# Supplementary material for: Methyl-triflate-mediated dearylmethylation of N-(arylmethyl)carboxamides via the retro-Mannich reaction induced by electrophilic dearomatization/rearomatization in an aqueous medium at room temperature
Source: Royal Society of Chemistry journal article supplement (doi:10.1039/c9gc00176j), 2019-01-01

# MeOTf-mediated De-arylmethylation of *N*-carboxamides via Retro-Mannich Reaction Induced by Dearomatization/Aromatization in Aqueous Medium

Hui Peng,<sup>a</sup> Jinhui Ma,<sup>b</sup> Wenkun Luo,<sup>a</sup> Guangwen Zhang,<sup>b</sup> and Biaolin Yin\*<sup>a</sup>

<sup>a</sup>Key Laboratory of Functional Molecular Engineering of Guangdong Province, School of Chemistry and Chemical Engineering, South China University of Technology, Guangzhou, P. R. China, 510640.

[blyin@scut.edu.cn](mailto:blyin@scut.edu.cn)

<sup>b</sup>Department of Food Science and Engineering, Jinan University, Guangzhou, 510632, China

| Content                                                        | Page    |
|----------------------------------------------------------------|---------|
| General information                                            | S2      |
| Experimental procedure                                         | S2-S4   |
| Characterization data of products                              | S4-S21  |
| References                                                     | S22     |
| <sup>1</sup> H and <sup>13</sup> C NMR spectra of all products | S23-S77 |

## General information

All reactions were carried out in air. Unless otherwise noted, all reagents and starting materials were purchased from commercial suppliers and used as received. FT-IR spectra were obtained with thin film samples or KBr pellets on a Bruker Vector 22 spectrometer, and data are expressed in  $\text{cm}^{-1}$ .  $^1\text{H}$  and  $^{13}\text{C}$ NMR spectra were recorded on a Bruker AVANCE III 400 (400 MHz for  $^1\text{H}$ ; 100MHz for  $^{13}\text{C}$ ),  $^1\text{H}$  (400 MHz) and  $^{13}\text{C}$  (101 MHz) NMR spectra were recorded in  $\text{CDCl}_3$  as a solvent. Chemical shifts are reported in ppm downfield from tetramethylsilane. MS were performed on Bruker Agilent1100/Esquire HCT PLUS mass spectrometer. The HRMS measurements were recorded on a TOF analyzer using an ESI source in the positive mode. Column chromatography was performed on silica gel (100–200 mesh) with mixtures of petroleum ether and ethyl acetate as the eluent.

## Experimental procedure

### General procedure for the preparation of 5

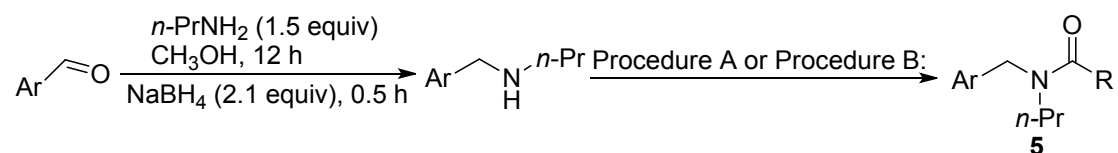

A solution of aromatic aldehydes (2 mmol, 1.0 equiv), propanamines, (3 mmol, 1.5 equiv) was stirred in  $\text{CH}_3\text{OH}$  (10 mL) at room temperature for 12 h. To the mixture was added  $\text{NaBH}_4$  (4.2 mmol, 159 mg, 2.1 equiv) in portion at 0 °C. The reaction was warmed to room temperature. After stirring at the same temperature for 0.5 h, the solvent was removed after reduced pressure and obtain the crude products.

Procedure A: To the solution of the above crude product in DCM (2 mmol, 5 mL) was added the acid (2.4 mmol, 1.2 equiv) at 0 °C, then a mixture of DCC (0.618 g, 3 mmol) and DMAP (0.024 g, 0.2 mmol) in  $\text{CH}_2\text{Cl}_2$  (2 mL) was added dropwise. The mixture was stirred for 12 h at room temperature and filtered through a short plug of silica gel, which was rinsed with EtOAc. The residue was purified by a silica gel column chromatography (petroleum ether/EtOAc = 5:1) to give the products.

Procedure B: To the solution of the above crude product and  $\text{Et}_3\text{N}$  (1.5 eq) in dichloromethane (2

mL/mmol), acyl chloride (1.0 equiv) was added in dropwise at 0 °C. The reaction mixture was stirred overnight at room temperature. The solution, diluted with dichloromethane, was washed with 1N HCl, dried over Na<sub>2</sub>SO<sub>4</sub> and concentrated under reduced. The residue was purified by a silica gel column chromatography (petroleum ether/EtOAc = 5:1) to give the products.

### Optimization of the reaction condition

**Table S1** Optimization of conditions for deindoylmethylation <sup>a</sup>

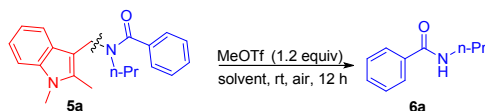

| Entry           | Electrophile            | Solvent                         | Yield (%) <sup>b</sup> |
|-----------------|-------------------------|---------------------------------|------------------------|
| 1               | MeOTf                   | DCM                             | 86                     |
| 2               | MeOTf                   | Ethyl acetate                   | 96                     |
| 3               | MeOTf                   | THF                             | ND                     |
| 4               | MeOTf                   | 1,4-Dioxane                     | 96                     |
| 5               | MeOTf                   | Acetone                         | 94                     |
| 6               | MeOTf                   | MeCN                            | 71                     |
| 7               | MeOTf                   | DMF                             | 99                     |
| 8               | MeOTf                   | MeOH                            | 99                     |
| 9               | MeOTf                   | EtOH                            | 99                     |
| 10              | MeOTf                   | Ethylene glycol                 | 89                     |
| 11              | MeOTf                   | Glycerol                        | 95                     |
| 12 <sup>c</sup> | MeOTf                   | H <sub>2</sub> O                | 93                     |
| 13              | MeOTf                   | 1:1 (v/v) EtOH/H <sub>2</sub> O | 99                     |
| 14              | MeOTf                   | 2:1 (v/v) EtOH/H <sub>2</sub> O | 99                     |
| 15              | MeOTf                   | 1:2 (v/v) EtOH/H <sub>2</sub> O | 91                     |
| 16 <sup>d</sup> | MeOTf                   | 1:1 (v/v) EtOH/H <sub>2</sub> O | 95                     |
| 17 <sup>e</sup> | MeOTf                   | 1:1 (v/v) EtOH/H <sub>2</sub> O | 97                     |
| 18              | EtOTf                   | 1:1 (v/v) EtOH/H <sub>2</sub> O | 97                     |
| 19              | Methyl methanesulfonate | 1:1 (v/v) EtOH/H <sub>2</sub> O | 96                     |
| 20              | NBS                     | 1:1 (v/v) EtOH/H <sub>2</sub> O | 66                     |
| 21              | NCS                     | 1:1 (v/v) EtOH/H <sub>2</sub> O | 59                     |
| 22              | Selectflour             | 1:1 (v/v) EtOH/H <sub>2</sub> O | 77                     |
| 23              | NFSI                    | 1:1 (v/v) EtOH/H <sub>2</sub> O | 70                     |

<sup>a</sup>Reaction conditions: **5a** (0.3 mmol), 2 mL of solvent. <sup>b</sup>Isolated yields are given. ND = not detected. <sup>c</sup>Time = 18 h. <sup>d</sup>Temp = 40 °C, Time = 6 h. <sup>e</sup>MeOTf (1 equiv).

### General procedure for the preparation of 6

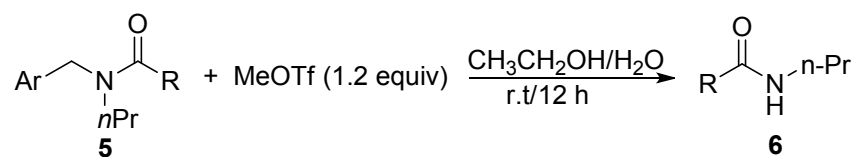

To a solution of **5** (0.3 mmol, 1.0 equiv) in the mixture of solvent (2 mL, EtOH/H<sub>2</sub>O = 1/1, v/v) was added the methyl trifluoromethanesulfonate (0.36 mmol, 1.2 equiv) at room temperature. The mixture was stirred at room temperature for 12 hours. Then, the crude mixture was filtered and concentrated. The residue was purified by a silica gel column chromatography (petroleum ether/EtOAc = 5:1) to give the desired products.

### Characterization Data for 5

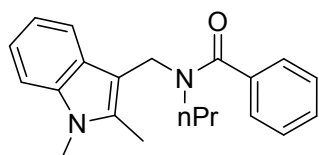

**N-((1,2-dimethyl-1H-indol-3-yl)methyl)-N-propylbenzamide (5a):** Prepared by the general procedure B in 62% yield as white solid; m.p 59 °C; <sup>1</sup>H NMR (400 MHz, CDCl<sub>3</sub>) δ 7.75 – 7.07 (m, 9H), 4.97 (s, 1.5H), 4.66 (s, 0.5H), 3.59 (s, 3H), 3.35 (s, 0.5H), 2.98 (s, 1.5H), 2.42 (br, 2.25H), 2.22 (br, 0.75H), 1.72 – 1.44 (m, 2H), 0.89(br, 0.75H), 0.66 (br, 2.25H); <sup>13</sup>C NMR (101 MHz, CDCl<sub>3</sub>) δ 171.71, 137.48, 136.74, 135.70, 129.07, 128.47, 127.83, 126.51, 121.08, 119.59, 118.45, 108.83, 106.82, 48.38, 37.00, 29.62, 21.49, 11.21, 10.41. HRMS (ESI) *m/z* calcd for C<sub>21</sub>H<sub>24</sub>N<sub>2</sub>NaO [M+Na]<sup>+</sup> 343.1786, Found 343.1781.

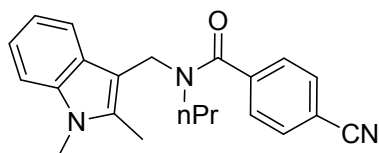

**4-Cyano-N-((1,2-dimethyl-1H-indol-3-yl)methyl)-N-propylbenzamide (5b):** Prepared by the general procedure A in 45% yield as yellow solid; m.p 57 °C; <sup>1</sup>H NMR (400 MHz, CDCl<sub>3</sub>) δ 7.62 (d, *J* = 6.3 Hz, 3H), 7.55 – 7.03 (m, 5H), 4.95 (s, 1.5H), 4.59 (s, 0.5H), 3.65 (s, 3H), 3.37 (br, 0.5H), 2.92 (br, 1.5H), 2.45 (s, 2.25H), 2.24 (s, 0.7H), 1.66 – 1.44(m, 2H), 0.89 (br, 0.75H), 0.69 (br, 2.25H); <sup>13</sup>C NMR (101 MHz, CDCl<sub>3</sub>) δ 169.57, 141.76, 136.75, 135.86, 132.41, 127.62, 127.23, 121.23, 119.71,

118.30, 118.20, 112.86, 108.92, 106.29, 48.34, 37.17, 29.67, 21.49, 11.15, 10.40. HRMS (ESI)  $m/z$  calcd for  $C_{22}H_{23}N_3NaO$   $[M+Na]^+$  368.1739, Found 368.1733.

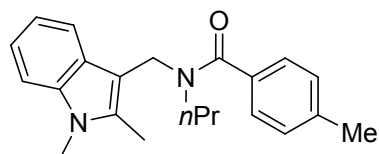

**N-((1,2-dimethyl-1H-indol-3-yl)methyl)-4-methyl-N-propylbenzamide (5c)** Prepared by the general procedure B in 60% yield as yellow syrup;  $^1H$  NMR (400 MHz,  $CDCl_3$ )  $\delta$  7.85 – 7.13 (m, 8H), 5.06 (s, 1.33H), 4.79 (s, 0.67H), 3.66 (s, 3H), 3.44 (br, 0.67H), 3.11 (s, 1.33H), 2.51 (s, 2H), 2.41 (s, 4H), 1.62 (br, 2H), 0.98 (br, 1H), 0.78 (br, 2H);  $^{13}C$  NMR (101 MHz,  $CDCl_3$ )  $\delta$  171.86, 139.02, 136.74, 135.65, 134.58, 129.08, 127.81, 126.62, 121.06, 119.55, 118.46, 108.84, 106.89, 48.46, 37.03, 33.96, 29.58, 21.44, 11.26, 10.39. HRMS (ESI)  $m/z$  calcd for  $C_{22}H_{27}N_2O$   $[M+H]^+$  335.2123, Found 335.2118.

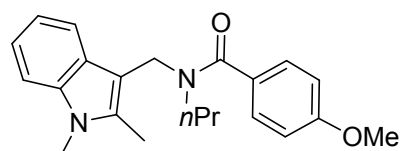

**N-((1,2-dimethyl-1H-indol-3-yl)methyl)-4-methoxy-N-propylbenzamide (5d)**: Prepared by the general procedure A in 50% yield as yellow syrup;  $^1H$  NMR (400 MHz,  $CDCl_3$ )  $\delta$  7.62 (br, 1H), 7.36 (br, 2H), 7.24 (d,  $J = 8.2$  Hz, 1H), 7.16 (t,  $J = 7.5$  Hz, 1H), 7.08 (t,  $J = 7.4$  Hz, 1H), 6.87 (d,  $J = 7.7$  Hz, 2H), 4.91 (s, 2H), 3.77 (s, 3H), 3.62 (s, 3H), 3.09 (br, 2H), 2.40 (br, 3H), 1.55 (br, 2H), 0.73 (br, 3H);  $^{13}C$  NMR (101 MHz,  $CDCl_3$ )  $\delta$  171.53, 160.29, 136.70, 135.35, 129.64, 128.58, 127.71, 121.02, 119.53, 118.32, 113.70, 108.76, 55.34, 33.95, 29.59, 25.10, 21.30, 11.27, 10.37. HRMS (ESI)  $m/z$  calcd for  $C_{22}H_{27}N_2O_2$   $[M+H]^+$  351.2073, Found 351.2067.

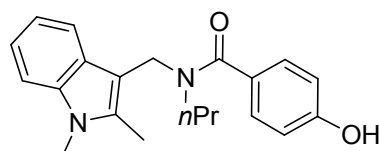

**N-((1,2-dimethyl-1H-indol-3-yl)methyl)-4-hydroxy-N-propylbenzamide (5e)**: Prepared by the general procedure A in 43% yield as white solid; m.p 140 °C;  $^1H$  NMR (400 MHz, DMSO)  $\delta$  9.87 (br, 1H), 7.68 – 7.15 (m, 4H), 7.09 (t,  $J = 7.2$  Hz, 1H), 7.01 (t,  $J = 7.0$  Hz, 1H), 6.85 (d,  $J = 6.0$  Hz, 2H), 4.81 (s, 2H), 3.64 (s, 3H), 3.02 (br, 2H), 2.38 (s, 3H), 1.59 – 1.40 (m, 2H), 0.68 (br, 3H);  $^{13}C$  NMR (101 MHz, DMSO)  $\delta$  170.94, 158.77, 136.83, 136.20, 128.90, 128.16, 127.61, 120.97, 119.43, 118.16,

115.44, 109.62, 106.60, 29.79, 21.11, 21.05, 11.58, 10.30. HRMS (ESI)  $m/z$  calcd for  $C_{21}H_{24}N_2NaO_2$   $[M+Na]^+$  359.1735, Found 359.1730.

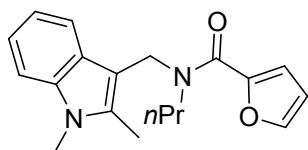

**N-((1,2-dimethyl-1H-indol-3-yl)methyl)-N-propylfuran-2-carboxamide (5f):** Prepared by the general procedure B in 55% yield as yellow syrup;  $^1H$  NMR (400 MHz,  $CDCl_3$ )  $\delta$  7.60 (br, 1H), 7.44 (s, 1H), 7.26 – 7.19 (m, 1H), 7.15 (t,  $J = 7.5$  Hz, 1H), 7.10 – 6.96 (m, 2H), 6.44 (br, 1H), 4.96 (s, 2H), 3.61 (s, 3H), 3.41 – 3.30 (m, 2H), 2.40 (s, 3H), 1.68 – 1.55 (m, 2H), 0.83 (t,  $J = 7.4$  Hz, 3H);  $^{13}C$  NMR (101 MHz,  $CDCl_3$ )  $\delta$  160.0, 148.8, 143.5, 136.7, 127.8, 121.0, 119.5, 118.4, 116.0, 111.2, 108.7, 77.6, 77.2, 76.9, 34.0, 29.6, 25.8, 25.1, 11.4, 10.4. HRMS (ESI)  $m/z$  calcd for  $C_{19}H_{22}N_2NaO_2$   $[M+Na]^+$  333.1579, Found 333.1573.

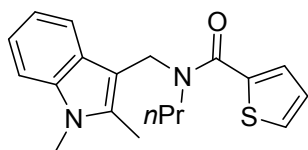

**N-((1,2-dimethyl-1H-indol-3-yl)methyl)-N-propylthiophene-2-carboxamide (5g):** Prepared by the general procedure B in 50% yield as yellow syrup;  $^1H$  NMR (400 MHz,  $CDCl_3$ )  $\delta$  7.58 (br, 1H), 7.38 – 7.25 (m, 2H), 7.20 (t,  $J = 6.7$  Hz, 1H), 7.14 (t,  $J = 7.3$  Hz, 1H), 7.07 (t,  $J = 6.9$  Hz, 1H), 6.96 (s, 1H), 4.95 (s, 2H), 3.57 (s, 3H), 3.29 (t,  $J = 7.0$  Hz, 2H), 2.36 (s, 3H), 1.68 – 1.55 (m, 2H), 0.80 (t,  $J = 6.7$  Hz, 3H);  $^{13}C$  NMR (101 MHz,  $CDCl_3$ )  $\delta$  164.33, 138.57, 136.72, 135.57, 128.37, 127.65, 126.79, 121.11, 119.62, 118.36, 108.85, 106.36, 34.02, 29.63, 25.20, 21.49, 11.34, 10.43. HRMS (ESI)  $m/z$  calcd for  $C_{19}H_{22}N_2NaOS$   $[M+Na]^+$  349.1351, Found 349.1345.

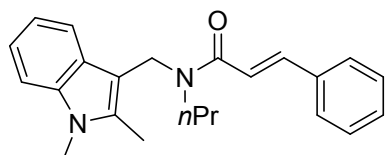

**N-((1,2-dimethyl-1H-indol-3-yl)methyl)-N-propylcinnamamide (5h):** Prepared by the general procedure A in 59% yield as yellow solid; m.p 95-98 °C;  $^1H$  NMR (400 MHz,  $CDCl_3$ )  $\delta$  7.79 (d,  $J = 15.3$  Hz, 1H), 7.63 (d,  $J = 7.7$  Hz, 1H), 7.50 (d,  $J = 7.0$  Hz, 2H), 7.33 (t,  $J = 7.3$  Hz, 3H), 7.24 (d,  $J = 8.4$  Hz, 1H), 7.16 (t,  $J = 7.5$  Hz, 1H), 7.09 (t,  $J = 7.2$  Hz, 1H), 6.85 (d,  $J = 15.4$  Hz, 1H), 4.93 (s, 2H),

3.64 (s, 3H), 3.24 (t,  $J = 7.5$  Hz, 2H), 2.44 (s, 3H), 1.55-1.68 (m, 2H), 0.89 (t,  $J = 7.3$  Hz, 3H);  $^{13}\text{C}$  NMR (101 MHz,  $\text{CDCl}_3$ )  $\delta$  166.09, 142.42, 136.65, 135.75, 135.64, 129.45, 128.81, 127.91, 127.78, 121.00, 119.53, 118.41, 118.16, 108.65, 107.22, 47.45, 38.40, 29.60, 22.53, 11.56, 10.42. HRMS (ESI)  $m/z$  calcd for  $\text{C}_{23}\text{H}_{26}\text{N}_2\text{NaO}$   $[\text{M}+\text{Na}]^+$  369.1943, Found 369.1937.

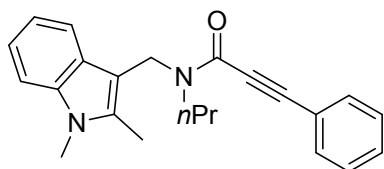

**N-((1,2-dimethyl-1H-indol-3-yl)methyl)-3-phenyl-N-propylpropiolamide (5i):** Prepared by the general procedure A in 52% yield as yellow syrup;  $^1\text{H}$  NMR (400 MHz,  $\text{CDCl}_3$ )  $\delta$  7.70 – 7.48 (m, 3H), 7.40 – 7.10 (m, 6H), 5.08 (s, 0.75H), 4.87 (s, 1.25H), 3.68 (d,  $J = 5.1$  Hz, 3H), 3.42 (t,  $J = 7.5$  Hz, 1.25H), 3.22 (t,  $J = 7.5$  Hz, 0.75H), 2.45 (s, 3H), 1.73 – 1.66 (m, 1.25H), 1.57 – 1.51 (m, 0.75H), 0.94 (t,  $J = 7.4$  Hz, 1.88H), 0.84 (t,  $J = 7.4$  Hz, 1.12H);  $^{13}\text{C}$  NMR (101 MHz,  $\text{CDCl}_3$ )  $\delta$  154.47 (153.92), 136.69 (136.59), 135.93 (135.47), 132.36 (132.31), 129.96 (129.85), 128.56 (128.51), 127.75 (127.50), 121.24 (121.10), 120.89, 119.78 (119.63), 118.32 (118.13), 108.85 (108.68), 106.33, 105.51, 100.00, 89.51, 82.63 (82.19), 48.65, 44.34 (43.52), 36.79 (33.99), 29.63, 24.98, 21.77 (20.17), 11.46 (10.44). HRMS (ESI)  $m/z$  calcd for  $\text{C}_{23}\text{H}_{24}\text{N}_2\text{NaO}$   $[\text{M}+\text{Na}]^+$  367.1786, Found 367.1781

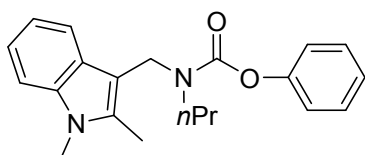

**Phenyl ((1,2-dimethyl-1H-indol-3-yl)methyl)(propyl)carbamate (5j):** Prepared by the general procedure B in 43% yield as white syrup;  $^1\text{H}$  NMR (400 MHz,  $\text{CDCl}_3$ )  $\delta$  7.67 (d,  $J = 6.6$  Hz, 1H), 7.34 (br, 2H), 7.23 (d,  $J = 7.9$  Hz, 1H), 7.17 - 7.08 (m, 5H), 4.79 (s, 2H), 3.60 (s, 3H), 3.26 - 3.16 (m, 2H), 2.41 (s, 3H), 1.70 - 1.57 (m, 2H), 0.92 - 0.83 (m, 3H);  $^1\text{H}$  NMR (400 MHz,  $\text{CDCl}_3$ )  $\delta$  7.68, 7.66, 7.34, 7.24, 7.22, 7.18, 7.17, 7.15, 7.12, 7.10, 7.09, 4.82, 4.75, 3.60, 3.22, 3.21, 2.41, 1.65, 1.63, 0.90, 0.88. HRMS (ESI)  $m/z$  calcd for  $\text{C}_{21}\text{H}_{24}\text{N}_2\text{NaO}_2$   $[\text{M}+\text{Na}]^+$  359.1735, Found 359.1730.

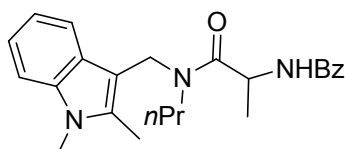

**N-(1-(((1,2-dimethyl-1H-indol-3-yl)methyl)(propyl)amino)-1-oxopropan-2-yl)benzamide (5k):**

Prepared by the general procedure A in 50% yield as syrup; <sup>1</sup>H NMR (400 MHz, CDCl<sub>3</sub>) δ 7.85 (d, *J* = 7.7 Hz, 2H), 7.51 (dd, *J* = 11.4, 7.5 Hz, 2H), 7.43 (t, *J* = 7.4 Hz, 3H), 7.26 (d, *J* = 7.3 Hz, 1H), 7.17 (t, *J* = 7.5 Hz, 1H), 7.08 (t, *J* = 7.4 Hz, 1H), 5.49 – 5.39 (m, 0.17H), 5.32 (d, *J* = 15.2 Hz, 0.83H), 5.14 – 5.04 (m, 0.83H), 4.86 (d, *J* = 15.2 Hz, 0.17H), 4.66 (d, *J* = 15.2 Hz, 0.17H), 4.39 (d, *J* = 15.2 Hz, 0.83H), 3.67 (s, 3H), 3.26 – 2.97 (m, 2H), 2.41 (s, 3H), 1.76 – 1.60 (m, 2H), 1.52 (d, *J* = 6.7 Hz, 0.5H), 1.42 (d, *J* = 6.6 Hz, 2.5H), 0.91 (t, *J* = 7.4 Hz, 2.5H), 0.81 (t, *J* = 7.4 Hz, 0.5H); <sup>13</sup>C NMR (101 MHz, CDCl<sub>3</sub>) δ 172.17, 166.29, 136.64, 135.65, 134.26, 131.55, 128.52, 127.64, 127.11, 121.15, 119.60, 118.06, 108.76, 106.47, 46.62, 46.08, 37.75, 29.61, 21.82, 19.53, 11.32, 10.26. HRMS (ESI) *m/z* calcd for C<sub>24</sub>H<sub>29</sub>N<sub>3</sub>NaO<sub>2</sub> [M+Na]<sup>+</sup> 414.2157, Found 414.2152

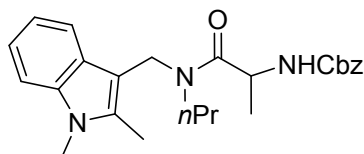

**Benzyl (1-(((1,2-dimethyl-1H-indol-3-yl)methyl)(propyl)amino)-1-oxopropan-2-yl)carbamate (5l):**

Prepared by the general procedure A in 47% yield as white solid; m.p 76-78°C; <sup>1</sup>H NMR (400 MHz, CDCl<sub>3</sub>) δ 7.49 (d, *J* = 7.8 Hz, 1H), 7.39 – 7.28 (m, 5H), 7.25 (t, *J* = 4.0 Hz, 1H), 7.17 (t, *J* = 7.5 Hz, 1H), 7.07 (t, *J* = 7.4 Hz, 1H), 5.86 (d, *J* = 7.7 Hz, 1H), 5.25 (d, *J* = 14.9 Hz, 1H), 5.16 – 5.06 (m, 2H), 4.73 – 4.56 (m, 1H), 4.38 (d, *J* = 14.9 Hz, 1H), 3.66 (s, 3H), 3.15 – 2.97 (m, 2H), 2.39 (s, 3H), 1.69 – 1.61 (m, 2H), 1.40 (d, *J* = 6.6 Hz, 0.6H), 1.31 (d, *J* = 6.7 Hz, 2.4H), 0.88 (t, *J* = 7.3 Hz, 2.4H), 0.79 (t, *J* = 7.4 Hz, 0.6H); <sup>13</sup>C NMR (101 MHz, CDCl<sub>3</sub>) δ 172.08, 155.61, 136.60, 135.65, 128.50, 128.03, 127.94, 127.68, 121.09, 119.56, 118.09, 108.70, 106.58, 66.66, 47.18, 46.68, 37.75, 29.60, 21.85, 19.66, 11.33, 10.24. HRMS (ESI) *m/z* calcd for C<sub>25</sub>H<sub>32</sub>N<sub>3</sub>O<sub>3</sub> [M+H]<sup>+</sup> 422.2444, Found 422.2438.

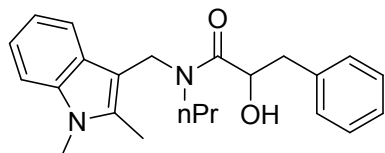

**N-((1,2-dimethyl-1H-indol-3-yl)methyl)-2-hydroxy-3-phenyl-N-propylpropanamide (5m):**

Prepared by the general procedure B in 63% yield as white white solid; m.p 84°C; <sup>1</sup>H NMR (400 MHz, CDCl<sub>3</sub>) δ 7.55 (br, 0.5H), 7.34 – 7.08 (m, 8.5H), 5.26 (d, *J* = 15.0 Hz, 0.75H), 4.98 (s, 0.25H), 4.61 (d, *J* = 15.0 Hz, 0.25H), 4.50 (s, 0.75H), 4.41 (d, *J* = 15.0 Hz, 0.75H), 4.09 (d, *J* = 15.0 Hz, 0.25H), 3.87



(s, 0.75H), 3.62 (s, 2.25H), 3.59 (s, 0.75H), 3.14 – 2.72 (m, 4H), 2.38 (s, 2.25H), 2.29 (s, 0.75H), 1.66 – 1.49 (m, 2H), 0.91– 0.75 (m, 3H);  $^{13}\text{C}$  NMR (101 MHz,  $\text{CDCl}_3$ )  $\delta$  173.51 (173.38), 137.44 (137.24), 136.71, 135.90 (135.09), (129.85) 129.64, 129.40, (128.55) 128.41, 127.76 (127.08), 126.86 (126.66), (121.38) 121.22, (119.92) 119.68, 118.29 (117.84), (109.04) 108.83, 106.37, 104.71, 69.63, 46.16 (46.06), 42.61 (42.37), 38.04, 29.68, 21.61 (20.43), 11.66 (11.40), 10.45 (10.34). HRMS (ESI)  $m/z$  calcd for  $\text{C}_{23}\text{H}_{28}\text{N}_2\text{NaO}_2$   $[\text{M}+\text{Na}]^+$  387.2048, Found 387.2043.

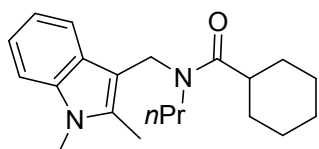

**N-((1,2-dimethyl-1H-indol-3-yl)methyl)-N-propylcyclohexanecarboxamide (5n):** Prepared by the general procedure B in 43% yield as white syrup;  $^1\text{H}$  NMR (400 MHz,  $\text{CDCl}_3$ )  $\delta$  7.53 (d,  $J = 7.7$  Hz, 0.85H), 7.39 (d,  $J = 7.8$  Hz, 0.15H), 7.22 (d,  $J = 8.8$  Hz, 1H), 7.14 (t,  $J = 7.5$  Hz, 1H), 7.06 (t,  $J = 7.3$  Hz, 1H), 4.81 (s, 1.66H), 4.68 (s, 0.34H), 3.62 (s, 3H), 3.21 (t,  $J = 7.1$  Hz, 0.34H), 3.04 (t,  $J = 7.4$  Hz, 1.66H), 2.38 (s, 3H), 1.89 – 1.52 (m, 9H), 1.50 – 1.18 (m, 4H), 0.86 (t,  $J = 7.3$  Hz, 2.5H), 0.79 (t,  $J = 7.2$  Hz, 0.5H);  $^{13}\text{C}$  NMR (101 MHz,  $\text{CDCl}_3$ )  $\delta$  175.90, 136.58, 135.49, 127.84, 120.89, 119.36, 118.42, 108.58, 107.47, 46.78, 41.12, 37.33, 29.74, 29.55, 25.98, 25.90, 22.26, 11.47, 10.28. HRMS (ESI)  $m/z$  calcd for  $\text{C}_{21}\text{H}_{31}\text{N}_2\text{O}$   $[\text{M}+\text{H}]^+$  327.2436, Found 327.2431.

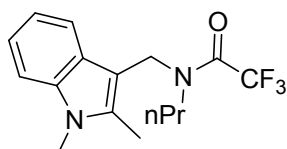

**N-((1,2-dimethyl-1H-indol-3-yl)methyl)-2,2,2-trifluoro-N-propylacetamide (5o):** Prepared by the general procedure A in 33% yield as white solid; m.p 84-86°C;  $^1\text{H}$  NMR (400 MHz, DMSO)  $\delta$  7.47-7.34 (m, 2H), 7.16-7.08 (m, 1H), 7.06-6.98 (m, 1H), 4.84 (s, 1.6H), 4.80 (s, 0.4H), 3.68 (s, 0.6H), 3.67 (s, 2.4H), 3.08 (t,  $J = 7.5$  Hz, 2H), 2.43 (s, 2.4H), 2.40 (s, 0.6H), 1.70-1.57 (m, 2H), 0.81 (t,  $J = 7.4$  Hz, 2.4H), 0.68 (t,  $J = 7.4$  Hz, 0.6H);  $^{13}\text{C}$  NMR (101 MHz, DMSO)  $\delta$  156.00 (156.32), 155.65 (155.31), 137.37 (137.16), 136.85(136.89), 127.36 (127.17), 121.22, 119.68, 117.88, 109.77 (109.95), 104.86 (103.15), 46.59 (46.23), 31.97 (33.83), 29.85 (30.20), 21.37 (19.71), 11.15 (11.43), 10.27 (10.12); HRMS (ESI)  $m/z$  calcd for  $\text{C}_{16}\text{H}_{19}\text{F}_3\text{N}_2\text{NaO}$   $[\text{M}+\text{Na}]^+$  335.1347, Found 335.1342.

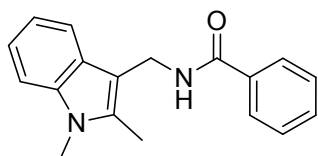

**N-((1,2-dimethyl-1H-indol-3-yl)methyl)benzamide (5p):** Prepared by the general procedure B in 60% yield as white syrup;  $^1\text{H}$  NMR (400 MHz,  $\text{CDCl}_3$ )  $\delta$  7.71 (d,  $J = 7.4$  Hz, 2H), 7.58 (d,  $J = 7.5$  Hz, 1H), 7.41 (t,  $J = 7.2$  Hz, 1H), 7.35 – 7.31 (m, 2H), 7.24 (s, 1H), 7.17 (t,  $J = 7.3$  Hz, 1H), 7.09 (t,  $J = 7.3$  Hz, 1H), 6.28 (br, 1H), 4.75 (d,  $J = 4.3$  Hz, 2H), 3.62 (s, 3H), 2.41 (s, 3H);  $^{13}\text{C}$  NMR (101 MHz,  $\text{CDCl}_3$ )  $\delta$  167.32, 136.70, 135.27, 134.65, 131.34, 128.51, 127.20, 126.97, 121.21, 119.61, 117.85, 108.91, 107.21, 34.90, 29.61, 10.33; HRMS (ESI)  $m/z$  calcd for  $\text{C}_{18}\text{H}_{18}\text{N}_2\text{NaO}^+$   $[\text{M}+\text{Na}]^+$  301.1311, Found 301.1312

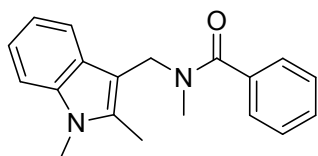

**N-((1,2-dimethyl-1H-indol-3-yl)methyl)-N-methylbenzamide (5q):** Prepared by the general procedure B in 80 % yield as white syrup;  $^1\text{H}$  NMR (400 MHz,  $\text{CDCl}_3$ )  $\delta$  7.75 – 7.53 (m, 1H), 7.51 – 7.22 (m, 5H), 7.20 – 7.04 (m, 3H), 4.90 (s, 1.5H), 4.63 (s, 0.5H), 3.52 (s, 3H), 2.87 (s, 0.75H), 2.68 (s, 2.25H), 2.38 (s, 2.25H), 2.16 (s, 0.75H);  $^{13}\text{C}$  NMR (101 MHz,  $\text{CDCl}_3$ )  $\delta$  171.05, 137.03, 136.76, 135.90, 129.42, 128.43, 127.83, 126.97, 121.11, 119.60, 118.52, 108.87, 106.57, 40.61, 36.25, 29.58, 10.36; HRMS (ESI)  $m/z$  calcd for  $\text{C}_{19}\text{H}_{20}\text{N}_2\text{NaO}^+$   $[\text{M}+\text{Na}]^+$  315.1468, Found 315.1467.

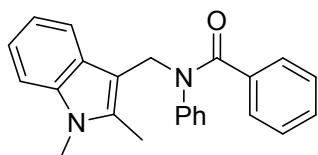

**N-((1,2-dimethyl-1H-indol-3-yl)methyl)-N-phenylbenzamide (5r):** Prepared by the general procedure B in 40 % yield as white syrup;  $^1\text{H}$  NMR (400 MHz,  $\text{CDCl}_3$ )  $\delta$  7.58 (d,  $J = 7.8$  Hz, 1H), 7.22 (s, 1H), 7.20 – 6.96 (m, 10H), 6.77 – 6.73 (m, 2H), 5.27 (s, 2H), 3.49 (s, 3H), 2.01 (s, 3H);  $^{13}\text{C}$  NMR (101 MHz,  $\text{CDCl}_3$ )  $\delta$  170.24, 142.91, 136.73, 136.68, 136.22, 129.15, 129.03, 128.76, 128.50, 127.67, 127.60, 126.88, 120.87, 119.39, 119.24, 108.45, 107.13, 43.83, 29.53, 9.93; HRMS (ESI)  $m/z$  calcd for  $\text{C}_{24}\text{H}_{22}\text{N}_2\text{NaO}^+$   $[\text{M}+\text{Na}]^+$  377.1624, Found 377.1625.

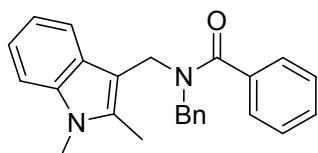

**N-benzyl-N-((1,2-dimethyl-1H-indol-3-yl)methyl)benzamide (5s):** Prepared by the general procedure B in 83% yield as white syrup;  $^1\text{H}$  NMR (400 MHz,  $\text{CDCl}_3$ )  $\delta$  7.59 (s, 1H), 7.48 – 7.40 (m, 2H), 7.38 – 7.22 (m, 8H), 7.21 – 7.15 (m, 1H), 7.10 (d,  $J = 5.4$  Hz, 2H), 4.62 (dd,  $J = 127.1, 121.4$  Hz, 4H), 3.61 (s, 3H), 2.10 (s, 3H);  $^{13}\text{C}$  NMR (101 MHz,  $\text{CDCl}_3$ )  $\delta$  172.16, 137.17, 136.87, 136.20, 129.50, 128.78, 128.59, 127.89, 127.45, 126.78, 126.69, 121.19, 119.62, 118.72, 108.82, 106.21, 50.69, 37.34, 29.60, 10.21; HRMS (ESI)  $m/z$  calcd for  $\text{C}_{25}\text{H}_{24}\text{N}_2\text{NaO}$   $[\text{M}+\text{Na}]^+$  391.1781, Found 391.1783.

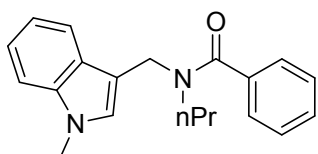

**N-((1-methyl-1H-indol-3-yl)methyl)-N-propylbenzamide (5aa):** Prepared by the general procedure B in 60% yield as yellow syrup;  $^1\text{H}$  NMR (400 MHz,  $\text{CDCl}_3$ )  $\delta$  7.65 (d,  $J = 103.7$  Hz, 1H), 7.41 – 6.86 (m, 9H), 4.93 (s, 1.2H), 4.65 (s, 0.8H), 3.70 (s, 3H), 3.50 (s, 0.8H), 3.07 (s, 1.2H), 1.69 (br, 0.8H), 1.54 (br, 1.2H), 0.93 (br, 1.2H), 0.70 (br, 1.8H);  $^{13}\text{C}$  NMR (101 MHz,  $\text{CDCl}_3$ )  $\delta$  171.82, 137.22, 129.17, 128.93, 128.47, 127.64, 126.92, 126.58, 121.99, 119.51, 118.80, 110.51, 109.47, 48.99, 38.30, 32.83, 21.42 (20.55), 11.57 (11.14). HRMS (ESI)  $m/z$  calcd for  $\text{C}_{20}\text{H}_{22}\text{N}_2\text{NaO}$   $[\text{M}+\text{Na}]^+$  329.1630, Found 329.1624.

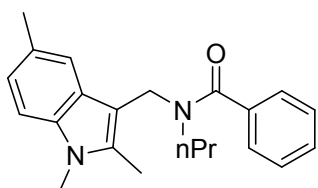

**N-propyl-N-((1,2,5-trimethyl-1H-indol-3-yl)methyl)benzamide (5ab):** Prepared by the general procedure B in 57% yield as yellow syrup;  $^1\text{H}$  NMR (400 MHz,  $\text{CDCl}_3$ )  $\delta$  7.65 – 7.25 (m, 6H), 7.16 – 6.97 (m, 2H), 4.95 (s, 1.5H), 4.65 (s, 0.5H), 3.61 (s, 3H), 3.36 (br, 0.5H), 2.99 (br, 1.5H), 2.44 (s, 4.5H), 2.23 (s, 1.5H), 1.65 – 1.46 (m, 2H), 0.95 – 0.85 (m, 0.75H), 0.68 (br, 2.25H);  $^{13}\text{C}$  NMR (101 MHz,  $\text{CDCl}_3$ )  $\delta$  171.66, 137.51, 135.70, 135.14, 129.01, 128.71, 128.43, 128.06, 127.02, 126.48, 122.55, 118.11, 108.48, 106.25, 48.30, 36.99, 29.62, 22.98, 21.61, 11.14, 10.38. HRMS (ESI)  $m/z$  calcd for  $\text{C}_{22}\text{H}_{26}\text{N}_2\text{NaO}$   $[\text{M}+\text{Na}]^+$  357.1943, Found 357.1937

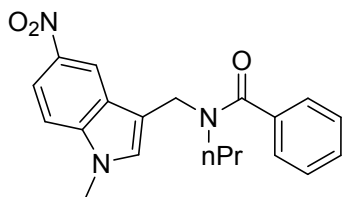

**N-((1,2-dimethyl-5-nitro-1H-indol-3-yl)methyl)-N-propylbenzamide (5ac):** Prepared by the general procedure B in 35% yield as yellow solid; m.p 101°C; <sup>1</sup>H NMR (400 MHz, CDCl<sub>3</sub>) δ 8.48 (d, *J* = 181.4 Hz, 1H), 8.07 (s, 1H), 7.60 – 7.10 (m, 7H), 4.93 (s, 1.3H), 4.70 (s, 0.7H), 3.82 (s, 3H), 3.49 (s, 0.7H), 3.12 (br, 1.3H), 1.79 – 1.51 (m, 2H), 0.95 (br, 1.1H), 0.74 (br, 1.9H); <sup>13</sup>C NMR (101 MHz, CDCl<sub>3</sub>) δ 171.95, 141.43, 139.81, 136.80, 131.85, 129.32, 128.49, 126.46, 117.41, 116.61, 113.61, 109.49, 49.51, 38.38, 33.28, 21.52, 11.03. HRMS (ESI) *m/z* calcd for C<sub>20</sub>H<sub>22</sub>N<sub>3</sub>O<sub>3</sub> [M+H]<sup>+</sup> 352.1661, Found 352.1656.

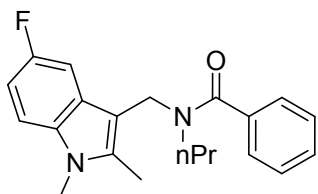

**N-((5-fluoro-1,2-dimethyl-1H-indol-3-yl)methyl)-N-propylbenzamide (5ad):** Prepared by the general procedure B in 43% yield as yellow solid; m.p 105-108°C; <sup>1</sup>H NMR (400 MHz, CDCl<sub>3</sub>) δ 7.62 – 7.23 (m, 6H), 7.15 (d, *J* = 4.6 Hz, 1H), 6.90 (t, *J* = 8.8 Hz, 1H), 4.92 (s, 1.5 H), 4.64 (s, 0.5H), 3.65 (s, 3H), 3.33 (br, 0.5H), 3.00 (br, 1.5H), 2.46 (br, 2.25H), 2.27 (br, 0.75H), 1.81 – 1.58 (m, 0.5H), 1.58 – 1.47 (s, 1.5H), 0.88 (br, 0.75H), 0.69 (br, 2.25H); <sup>13</sup>C NMR (101 MHz, CDCl<sub>3</sub>) δ 171.69, 159.21, 156.87, 137.27, 133.24, 129.08, 128.43, 126.46, 109.30, 109.20, 108.94, 107.10, 103.35, 48.47, 36.99, 29.82, 21.44, 11.12, 10.52. HRMS (ESI) *m/z* calcd for C<sub>21</sub>H<sub>23</sub>FN<sub>2</sub>NaO [M+Na]<sup>+</sup> 361.1692, Found 361.1687.

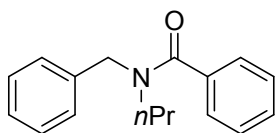

**N-benzyl-N-propylbenzamide (5ae):** Prepared by the general procedure B in 60% yield as white syrup; <sup>1</sup>H NMR (400 MHz, CDCl<sub>3</sub>) δ 7.46 – 7.09 (m, 10H), 4.78 (s, 1H), 4.49 (s, 1H), 3.42 (br, 1H), 3.10 (br, 1H), 1.66 (br, 1H), 1.50 (br, 1H), 0.93 (br, 1.5H), 0.68 (br, 1.5H); <sup>13</sup>C NMR (101 MHz, CDCl<sub>3</sub>) δ 172.13, 137.52, 136.82, 129.37, 128.74, 128.48, 128.06, 127.45, 126.83, 126.59, 52.59 (49.86), 47.2, (46.30), 21.45 (20.28), 11.42 (11.05). HRMS (ESI) *m/z* calcd for C<sub>17</sub>H<sub>20</sub>NO [M+H]<sup>+</sup>

254.1545, Found 254.1539.

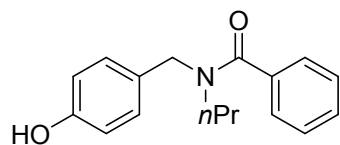

**N-(4-hydroxybenzyl)-N-propylbenzamide (5af):** Prepared by the general procedure B in 62% yield as white syrup;  $^1\text{H}$  NMR (400 MHz,  $\text{CDCl}_3$ )  $\delta$  7.85 (br, 1H), 7.47 – 7.33 (m, 5H), 7.19 (d,  $J = 7.3$  Hz, 1H), 6.98 – 6.79 (m, 3H), 4.73 (s, 1H), 4.43 (s, 1H), 3.46 (br, 1H), 3.12 (br, 1H), 1.68 (br, 1H), 1.51 (br, 1H), 0.95 (br, 1.5H), 0.70 (br, 1.5H);  $^{13}\text{C}$  NMR (101 MHz,  $\text{CDCl}_3$ )  $\delta$  172.40, 156.40, 135.99, 135.89, 129.39, 129.13, 128.31, 127.91, 127.39, 126.54, 126.30 (126.16), 115.69, 52.10 (49.44), 46.78 (46.01), 21.05 (19.97), 11.12 (10.70). HRMS (ESI)  $m/z$  calcd for  $\text{C}_{17}\text{H}_{19}\text{NNaO}_2$   $[\text{M}+\text{Na}]^+$  292.1313, Found 292.1308.

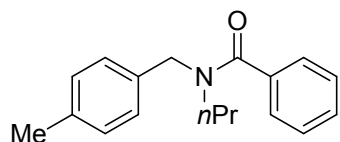

**N-(4-methylbenzyl)-N-propylbenzamide (5ag):** Prepared by the general procedure B in 65% yield as white syrup;  $^1\text{H}$  NMR (400 MHz,  $\text{CDCl}_3$ )  $\delta$  7.46 – 6.99 (m, 9H), 4.73 (s, 1H), 4.44 (s, 1H), 3.41 (br, 1H), 3.08 (br, 1H), 2.30 (s, 3H), 1.65 (br, 1H), 1.48 (br, 1H), 0.91 (br, 1.5H), 0.66 (br, 1.5H);  $^{13}\text{C}$  NMR (101 MHz,  $\text{CDCl}_3$ )  $\delta$  172.01, 136.96, 134.50, 133.94, 129.41, 128.45, 128.11, 126.81, 126.60, 52.28 (49.67), 46.94 (46.15), 21.44 (20.27), 21.13, 11.43 (11.02). HRMS (ESI)  $m/z$  calcd for  $\text{C}_{18}\text{H}_{21}\text{NNaO}$   $[\text{M}+\text{Na}]^+$  290.1521, Found 290.1515.

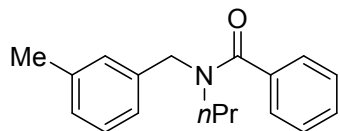

**N-(3-methylbenzyl)-N-propylbenzamide (5ah):** Prepared by the general procedure B in 62% yield as white syrup;  $^1\text{H}$  NMR (400 MHz,  $\text{CDCl}_3$ )  $\delta$  7.43 – 7.32 (m, 5H), 7.25 (br, 1H), 7.18 – 7.01 (m, 3H), 4.73 (s, 1H), 4.46 (s, 1H), 3.41 (br, 1H), 3.09 (br, 1H), 2.33 (s, 3H), 1.66 (br, 1H), 1.51 (br, 1H), 0.93 (br, 1.5H), 0.69 (br, 1.5H);  $^{13}\text{C}$  NMR (101 MHz,  $\text{CDCl}_3$ )  $\delta$  172.11, 136.88, 129.41, 128.45, 128.11, 127.40, 126.92, 126.78, 126.60, 65.08, 52.30 (49.67), 46.94 (46.15), 21.40 (21.12), 11.41 (11.00). HRMS (ESI)  $m/z$  calcd for  $\text{C}_{18}\text{H}_{22}\text{NO}$   $[\text{M}+\text{H}]^+$  268.1701, Found 268.1696.

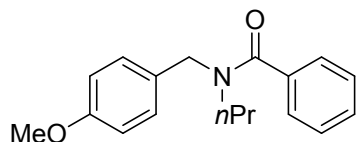

**N-(4-methoxybenzyl)-N-propylbenzamide(5ai):** Prepared by the general procedure B in 63% yield as white syrup;  $^1\text{H}$  NMR (400 MHz,  $\text{CDCl}_3$ )  $\delta$  7.44 – 7.26 (m, 6H), 7.06 (s, 1H), 6.87 (br, 2H), 4.71 (s, 1H), 4.42 (s, 1H), 3.76 (s, 3H), 3.40 (br, 1H), 3.08 (br, 1H), 1.65 (br, 1H), 1.50 (br, 1H), 0.92 (s, 1.5H), 0.68 (s, 1.5H);  $^{13}\text{C}$  NMR (101 MHz,  $\text{CDCl}_3$ )  $\delta$  171.98, 159.03, 136.92, 129.29, 128.44, 128.13, 126.56, 114.10, 55.24, 51.97 (49.59), 46.62 (46.02), 21.41 (20.25), 11.33 (11.01). HRMS (ESI)  $m/z$  calcd for  $\text{C}_{18}\text{H}_{22}\text{NO}_2$   $[\text{M}+\text{H}]^+$  284.1651, Found 284.1645.

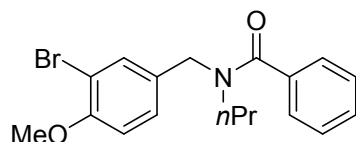

**N-(3-bromo-4-methoxybenzyl)-N-propylbenzamide (5aj):** Prepared by the general procedure B in 59% yield as white solid; m.p 70°C;  $^1\text{H}$  NMR (400 MHz,  $\text{CDCl}_3$ )  $\delta$  7.56 – 7.23 (m, 7H), 6.88 (d,  $J = 8.0$  Hz, 1H), 4.68 (s, 1H), 4.42 (s, 1H), 3.89 (s, 3H), 3.40 (br, 1H), 3.11 (br, 1H), 1.67 (br, 1H), 1.52 (br, 1H), 0.94 (br, 1.5H), 0.72 (br, 1.5H);  $^{13}\text{C}$  NMR (101 MHz,  $\text{CDCl}_3$ )  $\delta$  172.05, 155.28, 136.63, 132.97, 131.84, 129.43, 128.50, 126.53, 112.08, 100.00, 56.32, 51.48 (49.87), 46.29 (46.18), 21.51 (20.27), 11.42 (11.02). HRMS (ESI)  $m/z$  calcd for  $\text{C}_{18}\text{H}_{20}\text{BrNNaO}_2$   $[\text{M}+\text{Na}]^+$  384.0575, Found 384.0570.

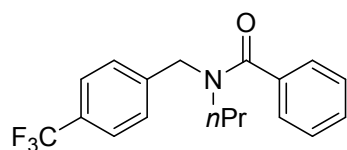

**N-propyl-N-(4-(trifluoromethyl)benzyl)benzamide (5ak):** Prepared by the general procedure B in 57% yield as white syrup;  $^1\text{H}$  NMR (400 MHz,  $\text{CDCl}_3$ )  $\delta$  7.61 (d,  $J = 7.8$  Hz, 2H), 7.51 – 7.25 (m, 7H), 4.81 (s, 1.2H), 4.57 (s, 0.8H), 3.42 (br, 0.8H), 3.15 (br, 1.2H), 1.67 (br, 0.8H), 1.53 (br, 1.2H), 0.95 (br, 1.2H), 0.72 (br, 1.8H);  $^{13}\text{C}$  NMR (101 MHz,  $\text{CDCl}_3$ )  $\delta$  172.26, 141.83, 141.37, 136.41, 129.56, 128.54, 128.16, 127.08, 126.52, 125.66, 52.16, 50.39, 47.28, 46.57, 21.60, 20.33, 11.26, 10.93. HRMS (ESI)  $m/z$  calcd for  $\text{C}_{18}\text{H}_{18}\text{F}_3\text{NNaO}$   $[\text{M}+\text{Na}]^+$  344.1238, Found 344.1233.

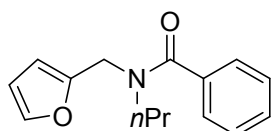

**N-(furan-2-ylmethyl)-N-propylbenzamide (5al):** Prepared by the general procedure B in 62% yield as yellow syrup;  $^1\text{H NMR}$  (400 MHz,  $\text{CDCl}_3$ )  $\delta$  7.64 – 7.19 (m, 6H), 6.47 -6.10 (m, 2H), 4.74 (s, 1H), 4.38 (s, 1H), 3.45 (br, 1H), 3.16 (br, 1H), 1.66 – 1.46 (m, 2H), 0.92 (s, 1.5H), 0.71 (s, 1.5H);  $^{13}\text{C NMR}$  (101 MHz,  $\text{CDCl}_3$ )  $\delta$  171.80, 151.00 (150.37), 142.56 (142.08), 136.63, 129.38, 128.41, 126.86, 110.42, 108.49, 50.24 (46.44), 46.19 (40.63), 21.46 (20.26), 11.29 (10.99); HRMS (ESI)  $m/z$  calcd for  $\text{C}_{15}\text{H}_{17}\text{NNaO}_2$   $[\text{M}+\text{H}]^+$  266.1157, Found 266.1151.

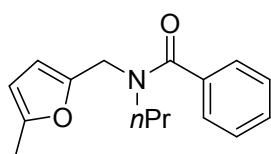

**N-((5-methylfuran-2-yl)methyl)-N-propylbenzamide (5am):** Prepared by the general procedure B in 62% yield as brown syrup;  $^1\text{H NMR}$  (400 MHz,  $\text{CDCl}_3$ )  $\delta$  7.45 – 7.17 (m, 5H), 6.17 – 5.75 (m, 2H), 4.60 (s, 1H), 4.23 (s, 1H), 3.36 (br, 1H), 3.08 (br, 1H), 2.18 (s, 3H), 1.51 (br, 2H), 0.84 (br, 1.5H), 0.63 (br, 1.5 H);  $^{13}\text{C NMR}$  (101 MHz,  $\text{CDCl}_3$ )  $\delta$  171.7, 152.3, 148.4, 136.8 129.3 128.4 126.9 109.3 106.2, 50.0, 46.3 40.7 13.6 11.1. HRMS (ESI)  $m/z$  calcd for  $\text{C}_{16}\text{H}_{20}\text{NO}_2$   $[\text{M}+\text{H}]^+$  258.1494, Found 258.1489.

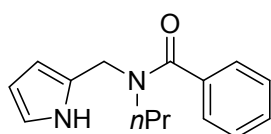

**N-((1H-pyrrol-2-yl)methyl)-N-propylbenzamide (5an):** Prepared by the general procedure B in 32% yield as yellow syrup;  $^1\text{H NMR}$  (400 MHz,  $\text{CDCl}_3$ )  $\delta$  9.01 (br, 0.6H), 8.84 (br, 0.4H), 7.52-7.34 (m, 5H), 6.8-6.48 (m, 2H), 6.25 (br, 0.4H), 6.04 (br, 0.6H), 4.67 (s, 0.8H), 4.36 (s, 1.2H), 3.49 (s, 1.2H), 3.15 (s, 0.8H), 1.76-1.61 (m, 1.2H), 1.61-1.48 (m, 0.8H), 0.97 (s, 1.8H), 0.74 (s, 1.2H);  $^{13}\text{C NMR}$  (101 MHz,  $\text{CDCl}_3$ )  $\delta$  171.82, 137.19, 129.21, 128.40, 126.71, 126.51, 119.05, 118.57, 117.21, 116.25, 108.66, 107.49, 49.38 (46.24), 45.89 (40.49), 21.47 (20.34), 11.44 (11.07). HRMS (ESI)  $m/z$  calcd for  $\text{C}_{15}\text{H}_{19}\text{N}_2\text{O}$   $[\text{M}+\text{H}]^+$  243.1497, Found 243.1492.

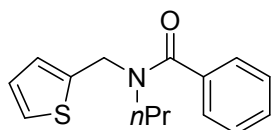

**N-propyl-N-(thiophen-2-ylmethyl)benzamide (5ao):** Prepared by the general procedure B in 52% yield as yellow syrup;  $^1\text{H}$  NMR (400 MHz,  $\text{CDCl}_3$ )  $\delta$  7.51–7.30 (m, 5H), 7.20 (s, 1H), 7.08–6.74 (m, 2H), 4.87 (br, 1.2H), 4.58 (br, 0.8H), 3.45 (br, 0.8H), 3.14 (br, 1.2H), 1.73–1.43 (m, 2H), 0.91 (br, 1.2H), 0.70 (br, 1.8H);  $^{13}\text{C}$  NMR (101 MHz,  $\text{CDCl}_3$ )  $\delta$  171.68, 140.21, 136.61, 129.42, 128.46, 126.61, 125.44, 49.83, 42.60, 21.57, 11.06. HRMS (ESI)  $m/z$  calcd for  $\text{C}_{15}\text{H}_{17}\text{NNaOS}$   $[\text{M}+\text{Na}]^+$  282.0929, Found 282.0923.

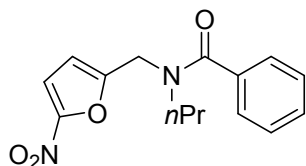

**N-((5-nitrofuran-2-yl)methyl)-N-propylbenzamide (5ap):** Prepared by the general procedure B in 31% yield as yellow syrup;  $^1\text{H}$  NMR (400 MHz,  $\text{CDCl}_3$ )  $\delta$  7.41 (s, 5H), 7.29 (d,  $J = 1.9$  Hz, 1H), 6.61 (br, 1H), 4.74 (br, 2H), 3.32 (br, 2H), 1.70–1.55 (m, 2H), 0.79 (br, 3H);  $^{13}\text{C}$  NMR (101 MHz,  $\text{CDCl}_3$ )  $\delta$  172.21, 155.19, 135.63, 129.91, 128.62, 126.85, 126.62, 112.73, 111.83, 51.65, 41.84, 21.92, 10.84. HRMS (ESI)  $m/z$  calcd for  $\text{C}_{15}\text{H}_{16}\text{N}_2\text{NaO}_4$   $[\text{M}+\text{Na}]^+$  311.1008, Found 311.1002.

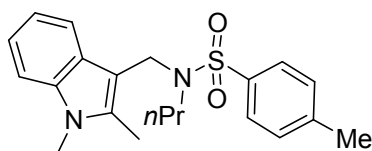

**N-((1,2-dimethyl-1H-indol-3-yl)methyl)-4-methyl-N-propylbenzenesulfonamide (7a):** Prepared by the general procedure B in 52% yield as yellow solid; m.p 104–106 °C;  $^1\text{H}$  NMR (400 MHz,  $\text{CDCl}_3$ )  $\delta$  7.72 (d,  $J = 7.9$  Hz, 2H), 7.55–7.49 (m, 1H), 7.26 (d,  $J = 7.7$  Hz, 2H), 7.20 (d,  $J = 5.7$  Hz, 1H), 7.13 (t,  $J = 7.4$  Hz, 1H), 7.03 (t,  $J = 7.3$  Hz, 1H), 4.45 (s, 2H), 3.58 (s, 3H), 2.95 (t,  $J = 7.4$  Hz, 2H), 2.40 (s, 3H), 2.34 (s, 3H), 1.32–1.21 (m, 2H), 0.58 (t,  $J = 7.3$  Hz, 3H);  $^{13}\text{C}$  NMR (101 MHz,  $\text{CDCl}_3$ )  $\delta$  143.00, 137.13, 136.60, 136.02, 129.67, 127.78, 127.25, 120.99, 119.49, 118.21, 108.72, 105.03, 49.13, 42.92, 29.59, 21.73, 21.58, 11.31, 10.31. HRMS (ESI)  $m/z$  calcd for  $\text{C}_{21}\text{H}_{26}\text{N}_2\text{NaO}_2\text{S}$   $[\text{M}+\text{Na}]^+$  393.1613, Found 393.1607.

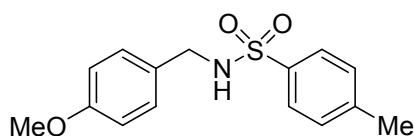

**N-(4-methoxybenzyl)-4-methylbenzenesulfonamide (7b):** Prepared by the general procedure B in



20% yield as white solid; m.p 6.8°C; <sup>1</sup>H NMR (400 MHz, CDCl<sub>3</sub>) δ 7.73 (d, *J* = 7.9 Hz, 2H), 7.27 (d, *J* = 8.0 Hz, 2H), 7.08 (d, *J* = 8.2 Hz, 2H), 6.76 (d, *J* = 8.1 Hz, 2H), 4.99 (br, 1H), 4.02 (d, *J* = 6.1 Hz, 2H), 3.74 (s, 3H), 2.42 (s, 3H); <sup>13</sup>C NMR (101 MHz, CDCl<sub>3</sub>) δ 159.24, 143.42, 136.95, 129.72, 129.28, 128.42, 127.19, 114.03, 55.30, 46.74, 21.55. HRMS (ESI) *m/z* calcd for C<sub>15</sub>H<sub>17</sub>NNaO<sub>3</sub>S [M+Na]<sup>+</sup> 314.0827, Found 314.0821.

### Characterization Data for 6

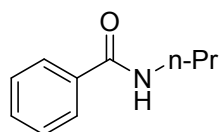

**N-propylbenzamide (6a):**<sup>1</sup> White solid was obtained in 99% (49 mg) isolated yield; <sup>1</sup>H NMR (400 MHz, CDCl<sub>3</sub>) δ 7.80 – 7.74 (m, 2H), 7.48 – 7.42 (m, 1H), 7.42 – 7.34 (m, 2H), 6.63 (br, 1H), 3.38 (q, *J* = 6.6 Hz, 2H), 1.67 – 1.56 (m, 2H), 0.95 (t, *J* = 7.4 Hz, 3H); <sup>13</sup>C NMR (101 MHz, CDCl<sub>3</sub>) δ 167.74, 134.88, 131.22, 128.44, 126.92, 41.79, 22.87, 11.40.

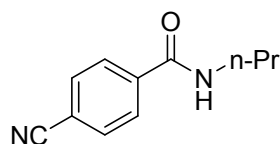

**4-Cyano-N-propylbenzamide (6b):** White solid was obtained in 99% (56.5 mg) isolated yield; mp 63°C; <sup>1</sup>H NMR (400 MHz, CDCl<sub>3</sub>) δ 7.87 (d, *J* = 8.1 Hz, 2H), 7.71 (d, *J* = 7.0 Hz, 2H), 6.52 (br, 1H), 3.42 (q, *J* = 6.0 Hz, 2H), 1.71 – 1.58 (m, 2H), 0.98 (t, *J* = 7.3 Hz, 3H); <sup>13</sup>C NMR (101 MHz, CDCl<sub>3</sub>) δ 165.84, 138.81, 132.38, 127.67, 118.05, 114.85, 42.04, 22.77, 11.41. HRMS (ESI) *m/z* calcd for C<sub>11</sub>H<sub>13</sub>N<sub>2</sub>O [M+H]<sup>+</sup> 189.1028, Found 189.1022.

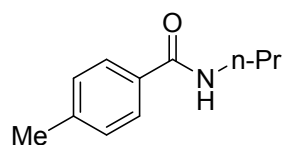

**4-Methyl-N-propylbenzamide (6c):**<sup>2</sup> Yellow solid was obtained in 99% (53.1 mg) isolated yield. <sup>1</sup>H NMR (400 MHz, CDCl<sub>3</sub>) δ 7.68 (d, *J* = 7.3 Hz, 2H), 7.22 (d, *J* = 7.5 Hz, 2H), 6.33 (br, 1H), 3.41 (q, *J* = 6.6 Hz, 2H), 2.40 (s, 3H), 1.71 – 1.58 (m, 2H), 0.98 (t, *J* = 7.2 Hz, 3H); <sup>13</sup>C NMR (101 MHz, CDCl<sub>3</sub>) δ 167.55, 141.61, 132.04, 129.15, 126.86, 41.71, 22.95, 21.38, 11.43.

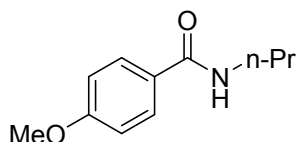

**4-Methoxy-N-propylbenzamide (6d):**<sup>2</sup> Yellowish liquid was obtained in 99% (58 mg) isolated yield; <sup>1</sup>H NMR (400 MHz, CDCl<sub>3</sub>) δ 7.76 (d, *J* = 8.1 Hz, 2H), 6.86 (d, *J* = 8.2 Hz, 2H), 6.73 (br, 1H), 3.80 (s, 3H), 3.35 (q, *J* = 6.6 Hz, 2H), 1.67 - 1.51 (m, 2H), 0.93 (t, *J* = 7.2 Hz, 3H); <sup>13</sup>C NMR (101 MHz, CDCl<sub>3</sub>) δ 167.29, 161.97, 128.75, 127.15, 113.60, 55.32, 41.74, 22.92, 11.43.

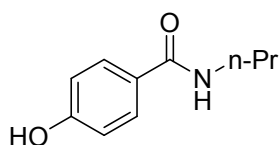

**4-Hydroxy-N-propylbenzamide (6e):**<sup>3</sup> Brown syrup was obtained in 83% (44.6 mg) isolated yield. <sup>1</sup>H NMR (400 MHz, CD<sub>3</sub>OD) δ 7.73 – 7.67 (m, 2H), 6.86 – 6.80 (m, 2H), 4.88 (s, 2H), 3.33 – 3.28 (m, 2H), 1.68 – 1.56 (m, 2H), 0.96 (t, *J* = 7.4 Hz, 3H); <sup>13</sup>C NMR (101 MHz, CD<sub>3</sub>OD) δ 168.74, 160.51, 128.78, 125.33, 114.69, 41.32, 22.42, 10.39. HRMS (ESI) *m/z* calcd for C<sub>10</sub>H<sub>13</sub>NNaO<sub>2</sub> [M+Na]<sup>+</sup> 202.0844, Found 202.0838.

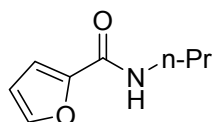

**N-propylfuran-2-carboxamide (6f):**<sup>4</sup> Yellow syrup was obtained in 94% (43.2 mg) isolated yield. <sup>1</sup>H NMR (400 MHz, CDCl<sub>3</sub>) δ 7.42 (s, 1H), 7.10 (d, *J* = 2.8 Hz, 1H), 6.58 – 6.41 (m, 2H), 3.39 (q, *J* = 6.6 Hz, 2H), 1.69 – 1.56 (m, 2H), 0.97 (t, *J* = 7.4 Hz, 3H); <sup>13</sup>C NMR (101 MHz, CDCl<sub>3</sub>) δ 158.47, 148.19, 143.68, 113.87, 112.06, 40.83, 22.93, 11.36;

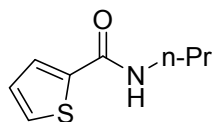

**N-propylthiophene-2-carboxamide (6g):** Yellow solid was obtained in 99% (50.2 mg) isolated yield; m.p 58-59°C; <sup>1</sup>H NMR (400 MHz, CDCl<sub>3</sub>) δ 7.56 (d, *J* = 3.1 Hz, 1H), 7.44 (d, *J* = 4.8 Hz, 1H), 7.05 (t, *J* = 3.8 Hz, 1H), 6.54 (s, 1H), 3.38 (q, *J* = 6.6 Hz, 2H), 1.69 – 1.56 (m, 2H), 0.95 (t, *J* = 7.3 Hz, 3H); <sup>13</sup>C NMR (101 MHz, CDCl<sub>3</sub>) δ 162.11, 139.38, 129.67, 127.87, 127.57, 41.74, 22.93, 11.40. HRMS (ESI) *m/z* calcd for C<sub>8</sub>H<sub>11</sub>NNaOS [M+Na]<sup>+</sup> 192.0459, Found 192.0454.

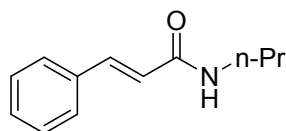

**N-propylcinnamamide (6h):**<sup>5</sup> White syrup was obtained in 90 % (52.2 mg) isolated yield; <sup>1</sup>H NMR (400 MHz, CDCl<sub>3</sub>) δ 7.62 (d, *J* = 15.6 Hz, 1H), 7.46 (s, 2H), 7.30 (s, 3H), 6.51 (d, *J* = 15.6 Hz, 1H), 6.43 (br, 1H), 3.34 (q, *J* = 6.7 Hz, 2H), 1.65 – 1.54 (m, 2H), 0.94 (t, *J* = 7.4 Hz, 3H); <sup>13</sup>C NMR (101 MHz, CDCl<sub>3</sub>) δ 166.21, 140.55, 134.98, 129.51, 128.76, 127.73, 121.18, 41.54, 22.91, 11.45.

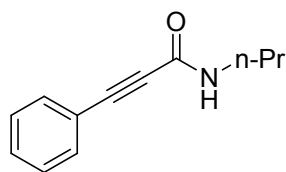

**3-Phenyl-N-propylpropiolamide (6i):** Yellow syrup was obtained in 96 % (53.9 mg) isolated yield;

<sup>1</sup>H NMR (400 MHz, CDCl<sub>3</sub>) δ 7.56 – 7.49 (m, 2H), 7.42 – 7.28 (m, 3H), 3.31 (q, *J* = 6.5 Hz, 2H), 1.64 – 1.53 (m, 2H), 0.95 (t, *J* = 7.4 Hz, 3H); <sup>13</sup>C NMR (101 MHz, CDCl<sub>3</sub>) δ 153.62, 132.45, 129.96, 128.48, 120.34, 84.51, 83.21, 41.70, 22.60, 11.34. HRMS (ESI) *m/z* calcd for C<sub>12</sub>H<sub>13</sub>NNaO [M+Na]<sup>+</sup> 210.0895, Found 210.0889.

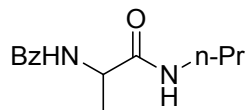

**N-(1-oxo-1-(propylamino)propan-2-yl)benzamide (6k):** White syrup was obtained in 90 % (63.2 mg) isolated yield; <sup>1</sup>H NMR (400 MHz, CDCl<sub>3</sub>) δ 7.84 (d, *J* = 7.6 Hz, 2H), 7.62 (d, *J* = 7.4 Hz, 1H), 7.48 (t, *J* = 7.3 Hz, 1H), 7.45 – 7.35 (m, 3H), 4.85 (p, *J* = 6.9 Hz, 1H), 3.30 – 3.12 (m, 2H), 1.58 – 1.49 (m, 2H), 1.47 (d, *J* = 6.9 Hz, 3H), 0.90 (t, *J* = 7.4 Hz, 3H); <sup>13</sup>C NMR (101 MHz, CDCl<sub>3</sub>) δ 172.74, 167.26, 133.85, 131.67, 128.46, 127.21, 49.29, 41.29, 22.63, 18.75, 11.35. HRMS (ESI) *m/z* calcd for C<sub>13</sub>H<sub>18</sub>N<sub>2</sub>NaO<sub>2</sub> [M+Na]<sup>+</sup> 257.1266, Found 257.1260.

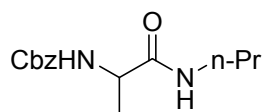

**Benzyl (1-oxo-1-(propylamino)propan-2-yl)carbamate (6l):** White solid was obtained in 90 % (71.3 mg) isolated yield; m.p 93-95°C; <sup>1</sup>H NMR (400 MHz, CDCl<sub>3</sub>) δ 7.38 – 7.23(m, 5H), 6.67 (s,

1H), 5.86 (s, 1H), 5.08 (s, 2H), 4.33 – 4.15 (m, 1H), 3.16 (br, 2H), 1.54 – 1.40 (m, 2H), 1.34 (d,  $J = 7.0$  Hz, 3H), 0.88 (t,  $J = 7.2$  Hz, 3H);  $^{13}\text{C}$  NMR (101 MHz,  $\text{CDCl}_3$ )  $\delta$  172.55, 156.12, 136.28, 128.51, 128.16, 127.94, 66.88, 50.60, 41.21, 22.65, 18.80, 11.28. HRMS (ESI)  $m/z$  calcd for  $\text{C}_{14}\text{H}_{20}\text{N}_2\text{NaO}_3$   $[\text{M}+\text{Na}]^+$  287.1372, Found 287.1366.

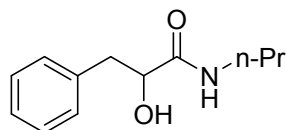

**2-Hydroxy-3-phenyl-N-propylpropanamide (6m):** Brown syrup was obtained in 55% (34.2 mg) isolated yield;  $^1\text{H}$  NMR (400 MHz,  $\text{CDCl}_3$ )  $\delta$  7.35 -7.18 (m, 5H), 6.65 (br, 1H), 4.24 (br, 1H), 3.55 (br, 1H), 3.25 -3.06 (m, 3H), 2.91-2.81 (m, 1H), 1.52-1.38 (m, 2H), 0.85 (t,  $J = 7.2$  Hz, 3H);  $^{13}\text{C}$  NMR (101 MHz,  $\text{CDCl}_3$ )  $\delta$  173.11, 137.15, 129.61, 128.55, 126.82, 72.77, 40.91, 40.77, 22.67, 11.32. HRMS (ESI)  $m/z$  calcd for  $\text{C}_{12}\text{H}_{17}\text{NNaO}_2$   $[\text{M}+\text{Na}]^+$  230.1157, Found 230.1151.

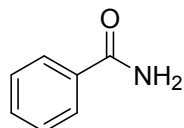

**Benzamide (6p):**<sup>6</sup> White solid was obtained in 93% (33.7 mg) isolated yield;  $^1\text{H}$  NMR (400 MHz, DMSO)  $\delta$  8.03 (s, 1H), 7.92 (d,  $J = 7.6$  Hz, 2H), 7.56 – 7.49 (m, 1H), 7.49 – 7.38 (m, 3H);  $^{13}\text{C}$  NMR (101 MHz, DMSO)  $\delta$  168.50, 134.72, 131.70, 128.68, 127.95.

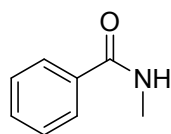

**N-methylbenzamide (6q):**<sup>7</sup> White solid was obtained in 70% (28 mg) isolated yield;  $^1\text{H}$  NMR (400 MHz,  $\text{CDCl}_3$ )  $\delta$  7.78 (d,  $J = 7.4$  Hz, 2H), 7.44 (t,  $J = 7.2$  Hz, 1H), 7.36 (t,  $J = 7.5$  Hz, 2H), 7.00 (br, 1H), 2.94 (d,  $J = 4.5$  Hz, 3H);  $^{13}\text{C}$  NMR (101 MHz,  $\text{CDCl}_3$ )  $\delta$  168.54, 134.57, 131.28, 128.44, 126.97, 26.81.

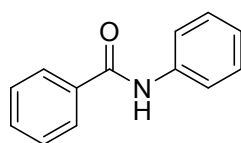

**N-phenylbenzamide (6r):**<sup>8</sup> White solid was obtained in 99% (58.5 mg) isolated yield;  $^1\text{H}$  NMR (400

MHz, DMSO)  $\delta$  10.27 (br, 1H), 7.98 (d,  $J = 7.3$  Hz, 2H), 7.82 (d,  $J = 7.8$  Hz, 2H), 7.63-7.51 (m, 3H), 7.37 (t,  $J = 7.8$  Hz, 2H), 7.12 (t,  $J = 7.1$  Hz, 1H);  $^{13}\text{C}$  NMR (101 MHz, DMSO)  $\delta$  166.06, 139.67, 135.49, 132.00, 129.07, 128.84, 128.13, 124.13, 120.86;

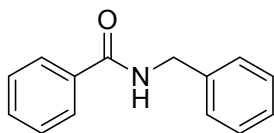

**N-benzylbenzamide (6s):**<sup>9</sup> White solid was obtained in 99% (63 mg) isolated yield;  $^1\text{H}$  NMR (400 MHz,  $\text{CDCl}_3$ )  $\delta$  7.77 (d,  $J = 7.5$  Hz, 2H), 7.45 (t,  $J = 7.3$  Hz, 1H), 7.36 (t,  $J = 7.3$  Hz, 2H), 7.32 – 7.22 (m, 5H), 6.84 (s, 1H), 4.57 (d,  $J = 5.5$  Hz, 2H);  $^{13}\text{C}$  NMR (101 MHz,  $\text{CDCl}_3$ )  $\delta$  167.53, 138.36, 134.43, 131.51, 128.73, 128.55, 127.85, 127.52, 127.08, 44.06;

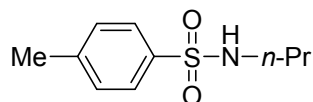

**4-Methyl-N-propylbenzenesulfonamide (8a):**<sup>10</sup> Yellow solid was obtained in 99% (63.3 mg) isolated yield;  $^1\text{H}$  NMR (400 MHz,  $\text{CDCl}_3$ )  $\delta$  7.77 (d,  $J = 8.3$  Hz, 2H), 7.30 (d,  $J = 8.2$  Hz, 2H), 5.05 (s, 1H), 2.88 (q,  $J = 6.9$  Hz, 2H), 2.42 (s, 3H), 1.52 – 1.42 (m, 2H), 0.85 (t,  $J = 7.4$  Hz, 3H);  $^{13}\text{C}$  NMR (101 MHz,  $\text{CDCl}_3$ )  $\delta$  143.26, 137.10, 129.66, 127.09, 44.95, 22.86, 21.47, 11.09.

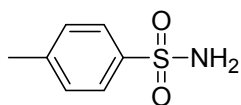

**4-Methylbenzenesulfonamide (8b):**<sup>11</sup> White solid was obtained in 87% (44.6 mg) isolated yield;  $^1\text{H}$  NMR (400 MHz,  $\text{CD}_3\text{OD}$ )  $\delta$  7.80 (d,  $J = 7.9$  Hz, 2H), 7.35 (d,  $J = 7.9$  Hz, 2H), 4.82 (s, 2H), 2.42 (s, 3H);  $^{13}\text{C}$  NMR (101 MHz,  $\text{CD}_3\text{OD}$ )  $\delta$  142.80, 140.67, 129.17, 125.79.

## References

1. D. P. Ojha, K. Gadde, and K. R. Prabhu, *Org. Lett.*, 2016, **18**, 5062.
2. W. Tong, P. Cao, Y. Liu, and J. Chen, *J. Org. Chem.*, 2017, **82**, 11603.
3. S. M. Hyatt, E. L. Lockamy, R. A. Stein, D. P. McDonnell, A. B. Miller, L. A. Orband-Miller, T. M. Willson and W. J. Zuercher, *J. Med. Chem.*, 2007, **50**, 6722.
4. N. Laidaoui, J. Roger, A. Miloudi, D. El. Abed, and H. Doucet, *Eur. J. Org. Chem.*, 2011, **2011**, 4373.
5. S. De Sarkar and A. Studer, *Org. Lett.*, 2010, **12**, 1992.
6. G. Meng, S. Shi, R. Lalancette, R. Szostak, and M. Szostak, *J. Am. Chem. Soc.*, 2018, **140**, 727
7. Y. Yuan, R. Kamaraj, C. Bruneau, T. Labasque, T. Roisnel, and R. Gramage-Doria, *Org. Lett.*, 2017, **19**, 6404.
8. S. Liu, H. Wang, X. Dai, and F. Shi, *Green Chem.*, 2018, **20**, 3457.
9. J. D. Williams, W. J. Kerr, S. G. Leach, and D. M. Lindsay, *Angew. Chem. Int. Ed.*, 2018, **57**, 12126.
10. S. K. R. Parumala, R. K. Peddinti, *Tetrahedron Lett.*, 2016, **57**, 1232.
11. N. Chandna, F. Kaur, S. Kumar and N. Jain, *Green Chem.*, 2017, **19**, 4268.

# <sup>1</sup>H and <sup>13</sup>C NMR spectra of all products

## N-((1,2-dimethyl-1H-indol-3-yl)methyl)-N-propylbenzamide (5a)

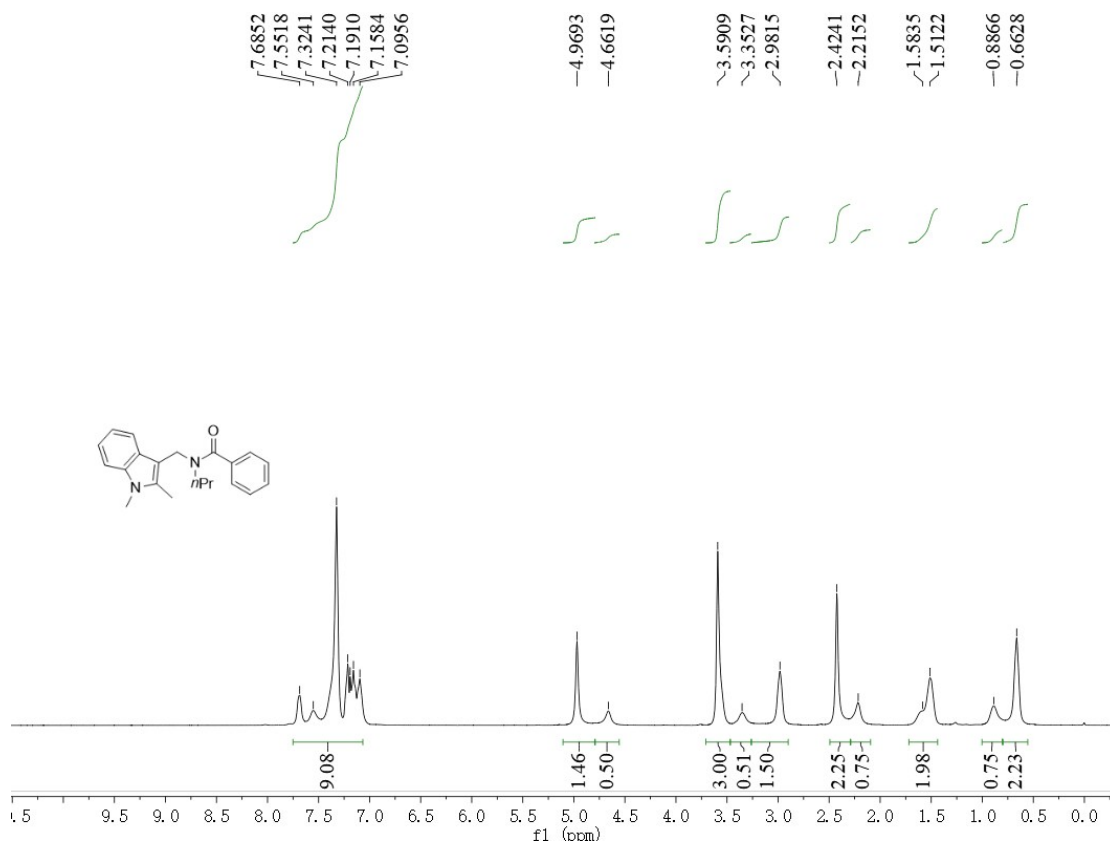

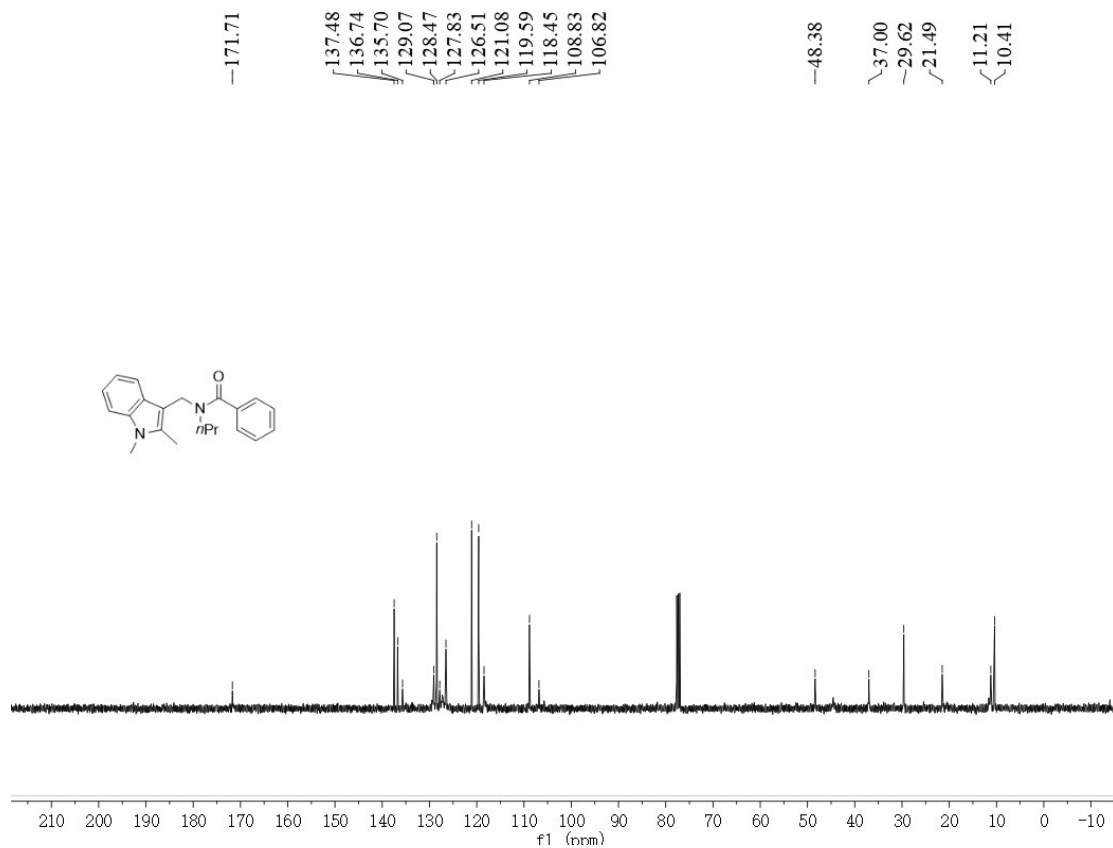

**4-Cyano-N-((1,2-dimethyl-1H-indol-3-yl)methyl)-N-propylbenzamide (5b)**

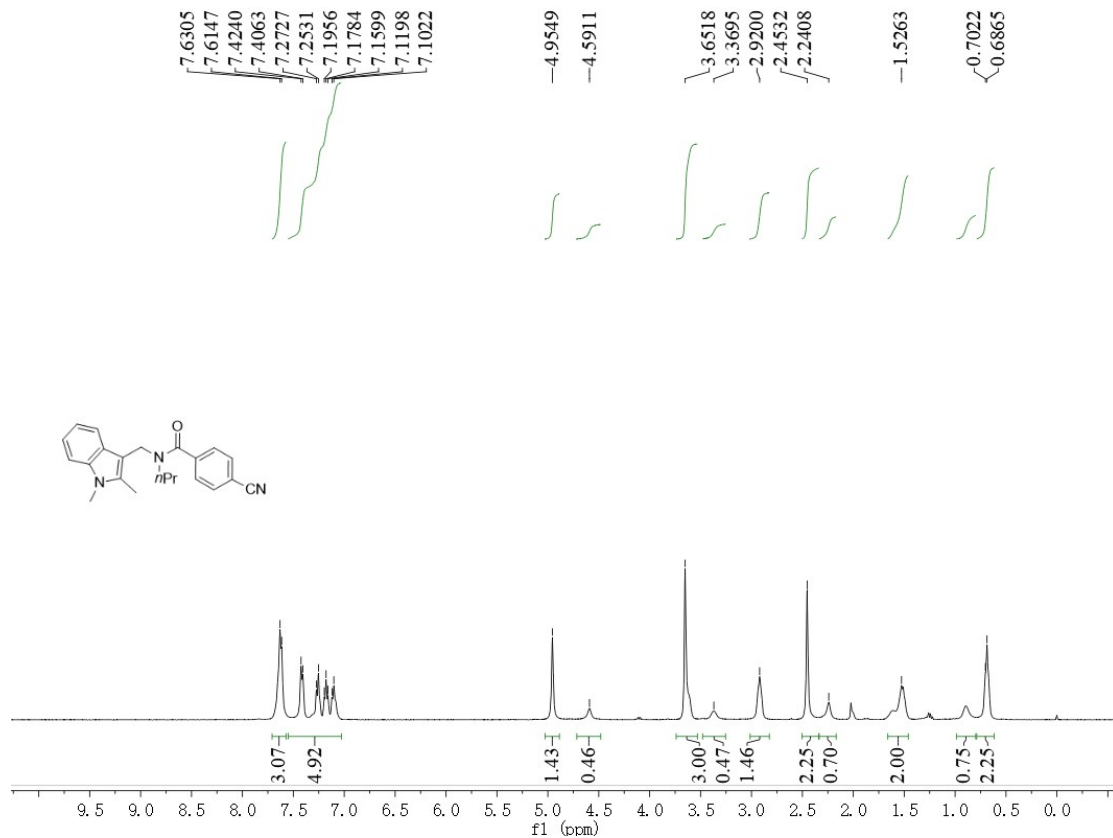



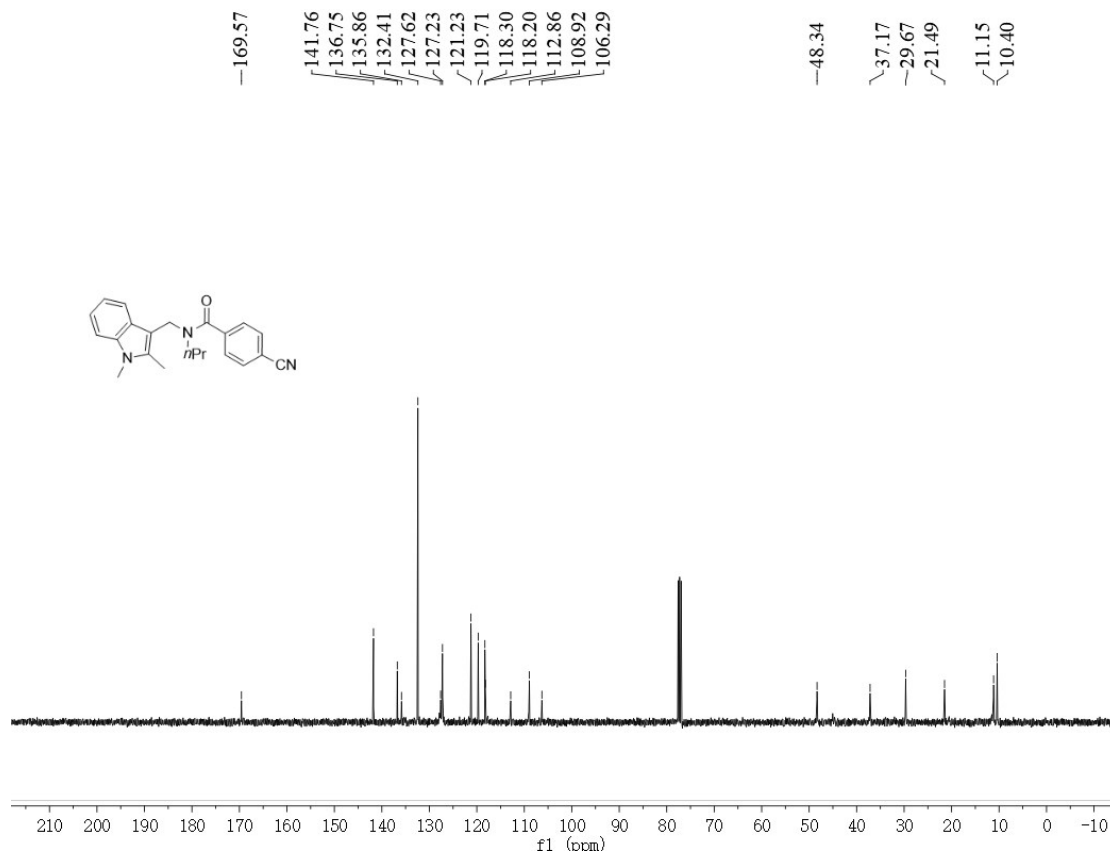

**N-((1,2-dimethyl-1H-indol-3-yl)methyl)-4-methyl-N-propylbenzamide (5c)**

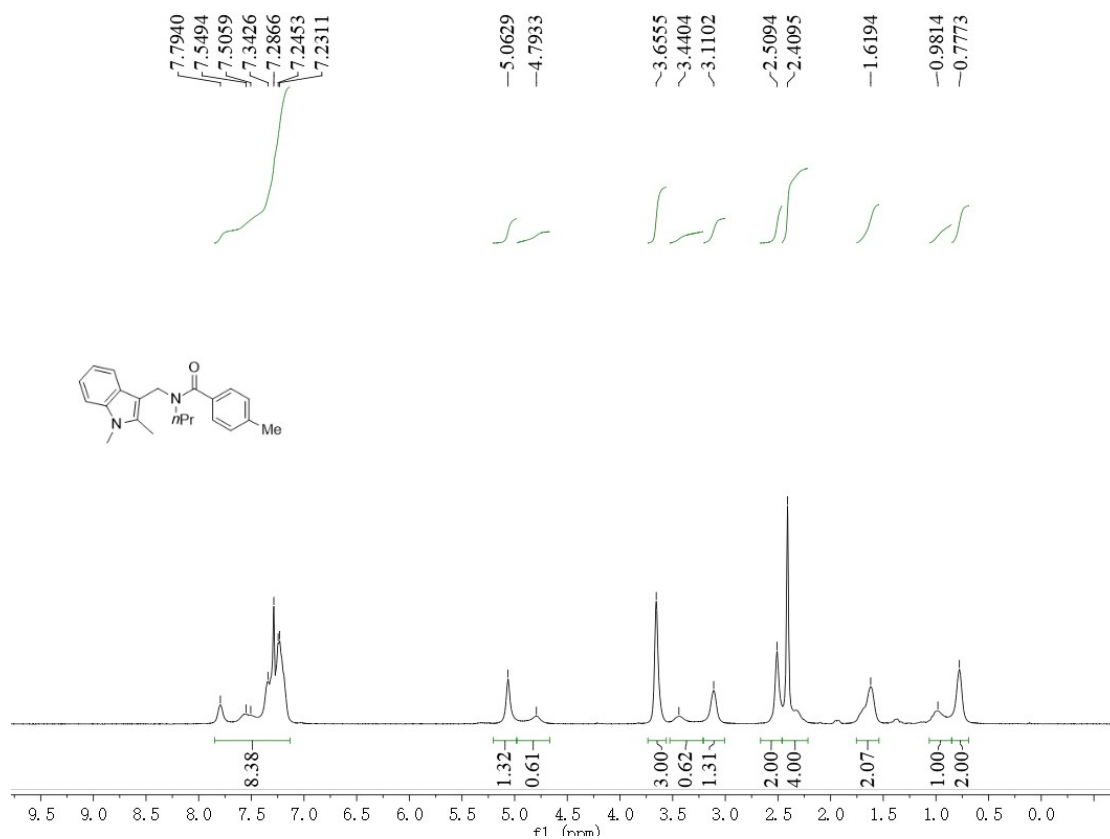

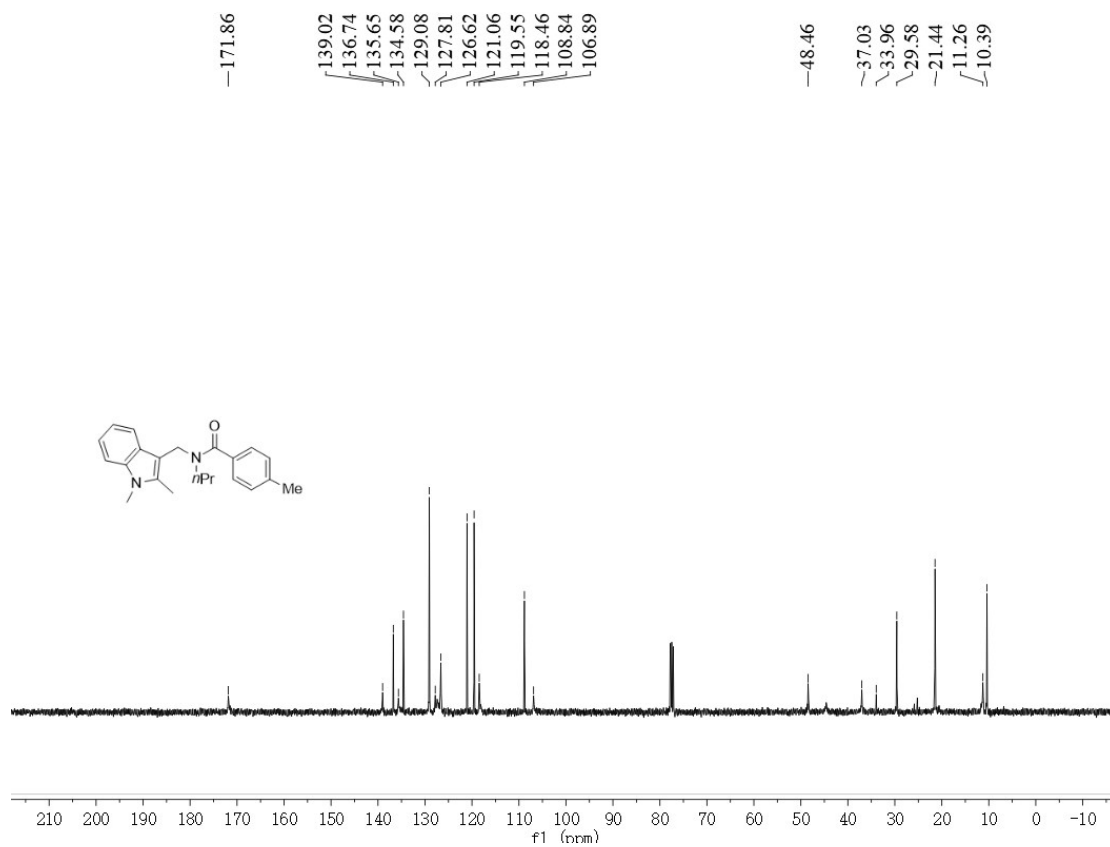

**N-((1,2-dimethyl-1H-indol-3-yl)methyl)-4-methoxy-N-propylbenzamide (5d)**

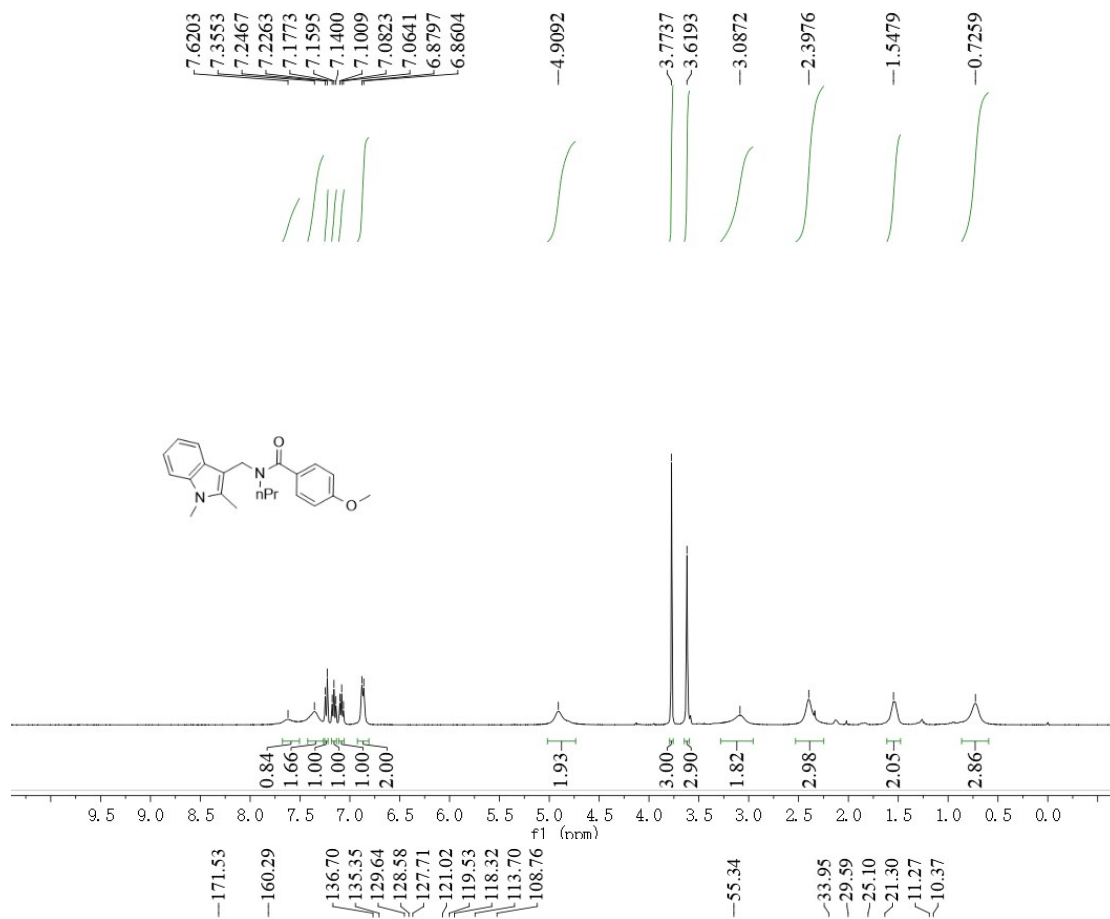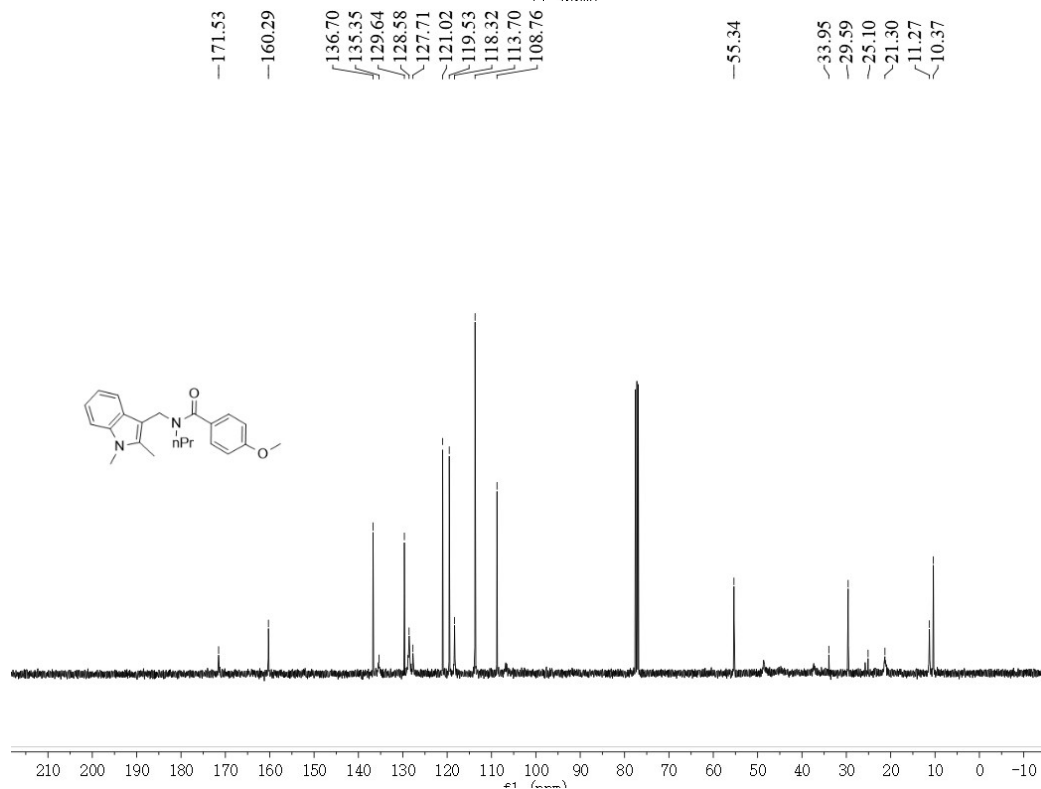

N-((1,2-dimethyl-1H-indol-3-yl)methyl)-4-hydroxy-N-propylbenzamide (5e)

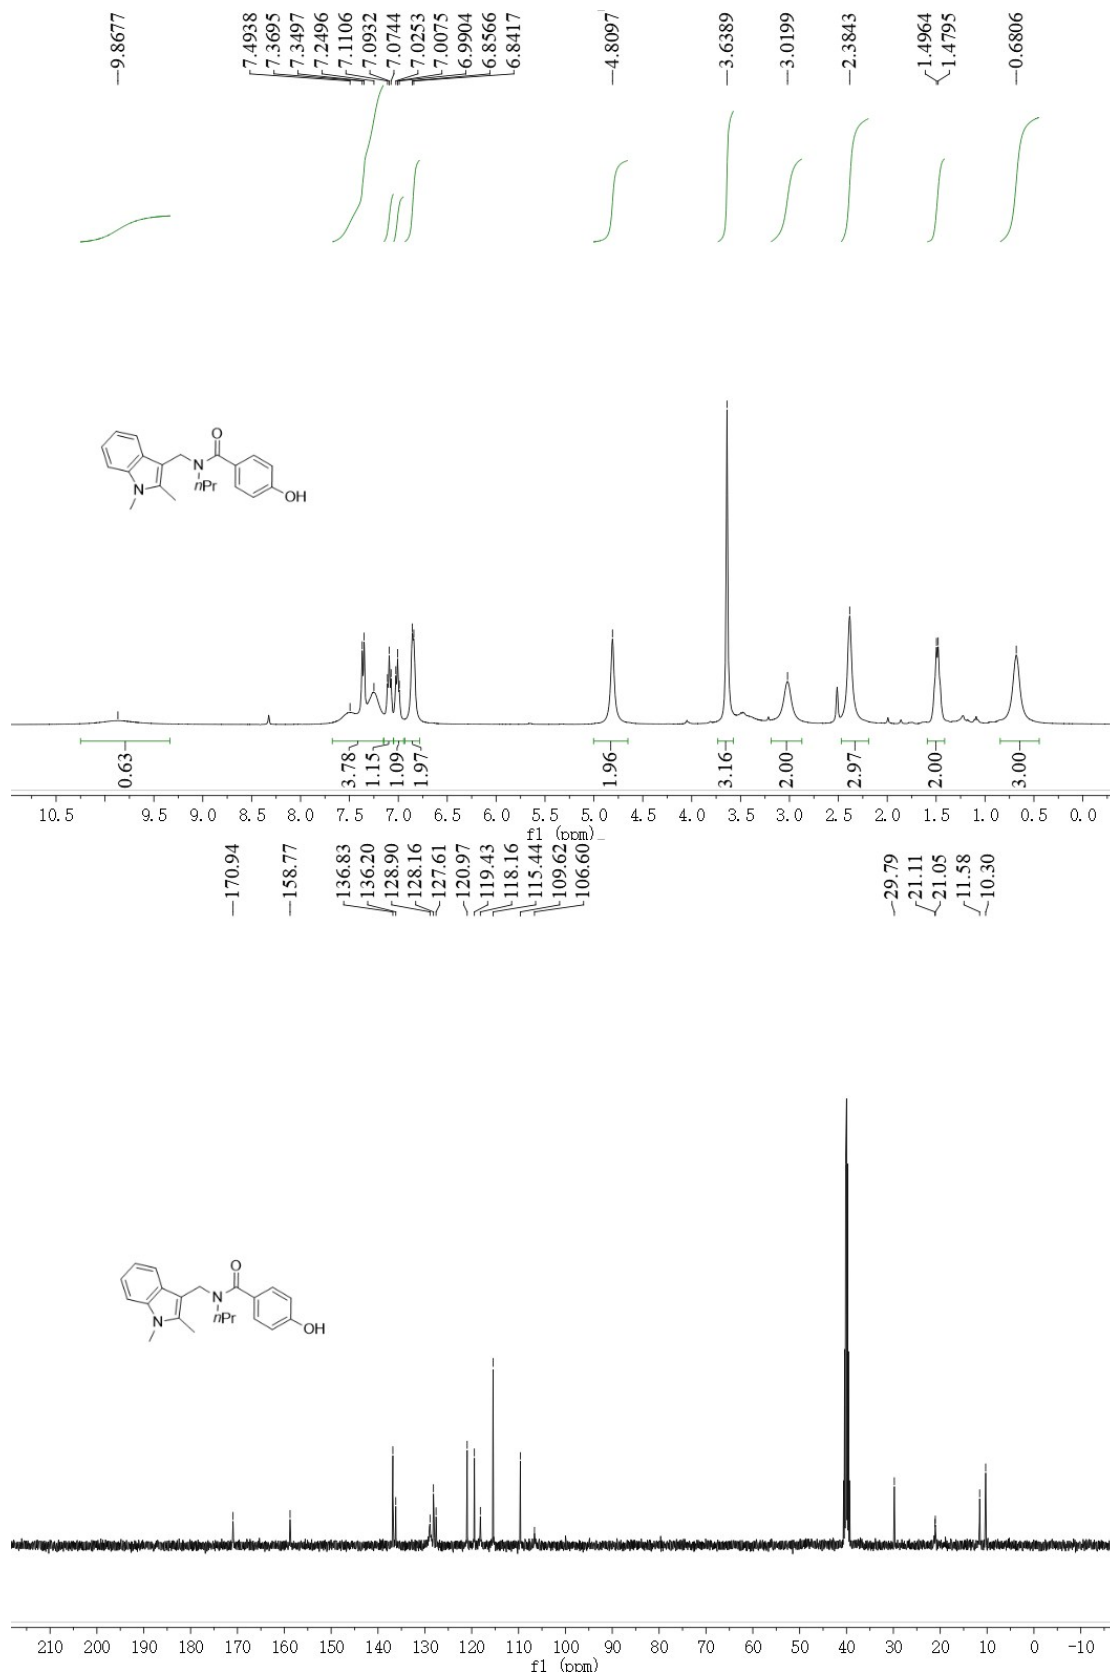

**N-((1,2-dimethyl-1H-indol-3-yl)methyl)-N-propylfuran-2-carboxamide (5f)**

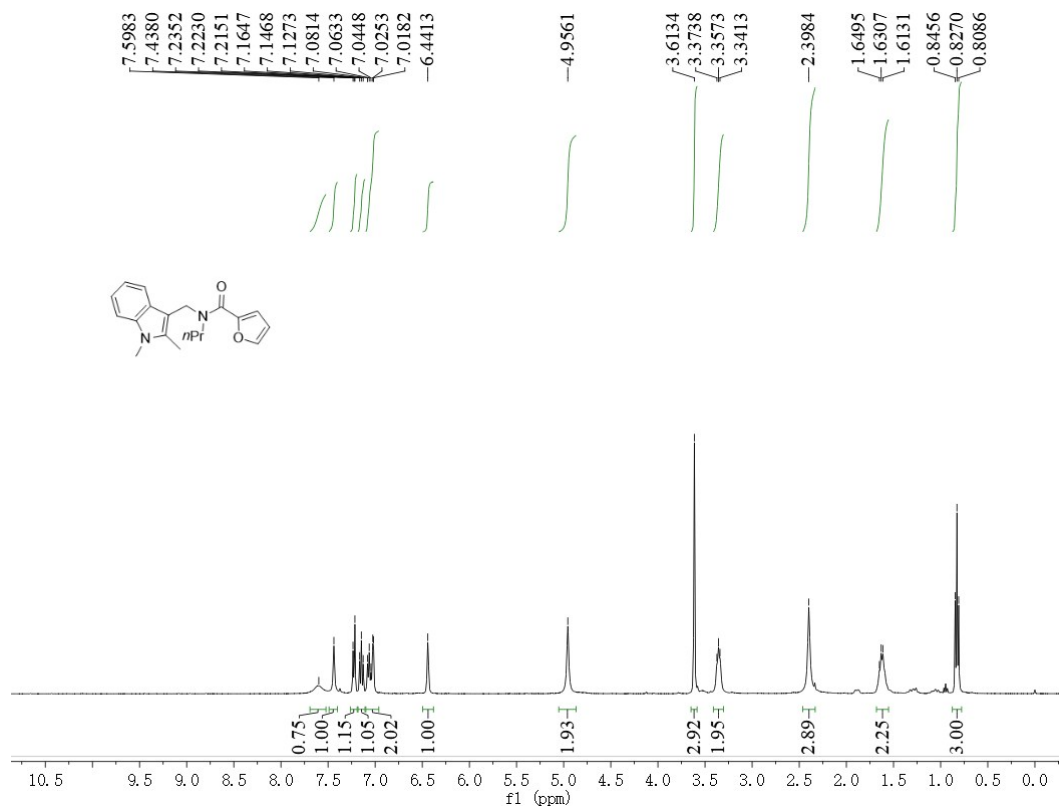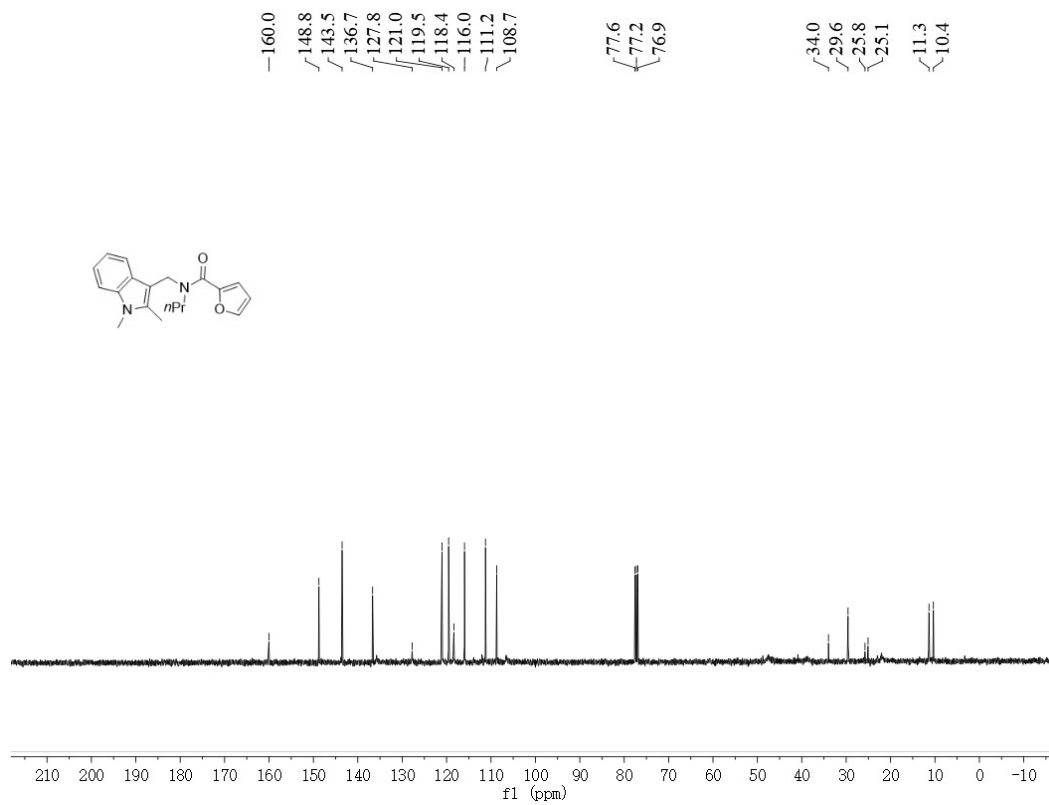

**N-((1,2-dimethyl-1H-indol-3-yl)methyl)-N-propylthiophene-2-carboxamide (5g)**

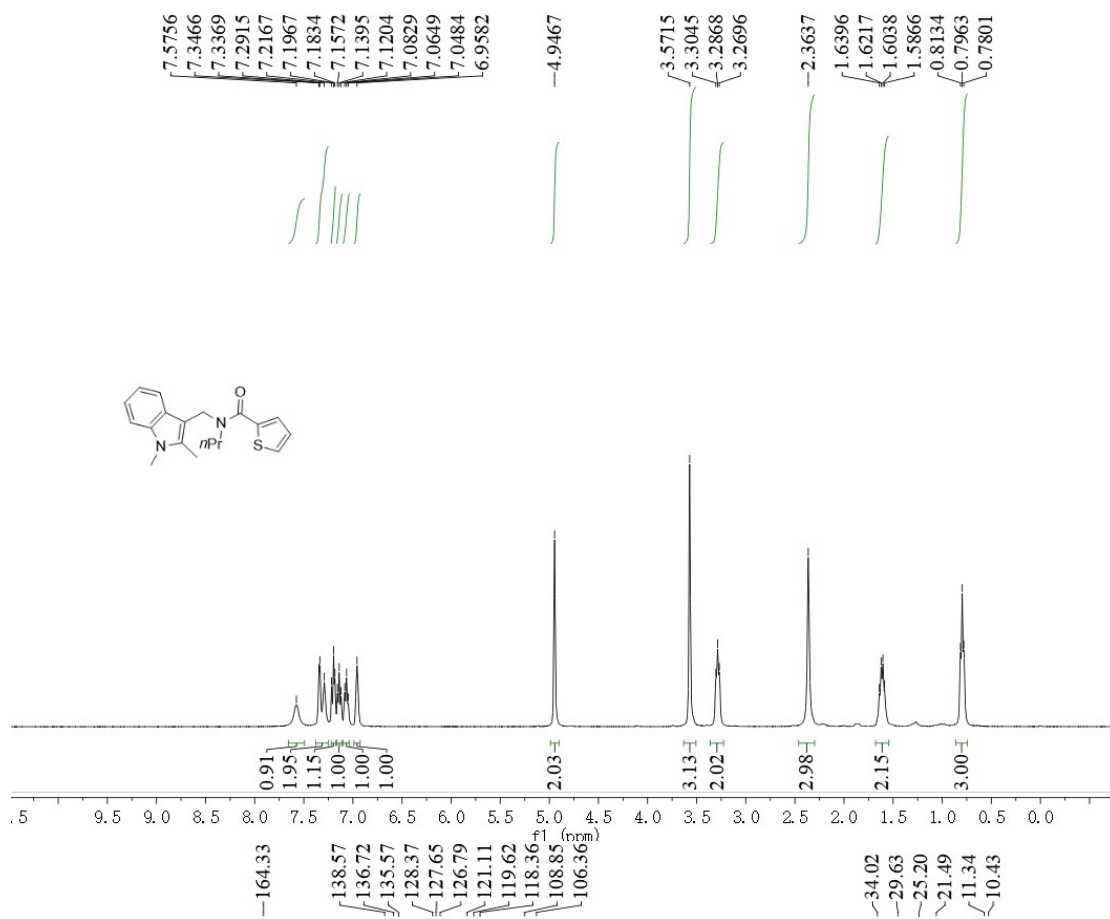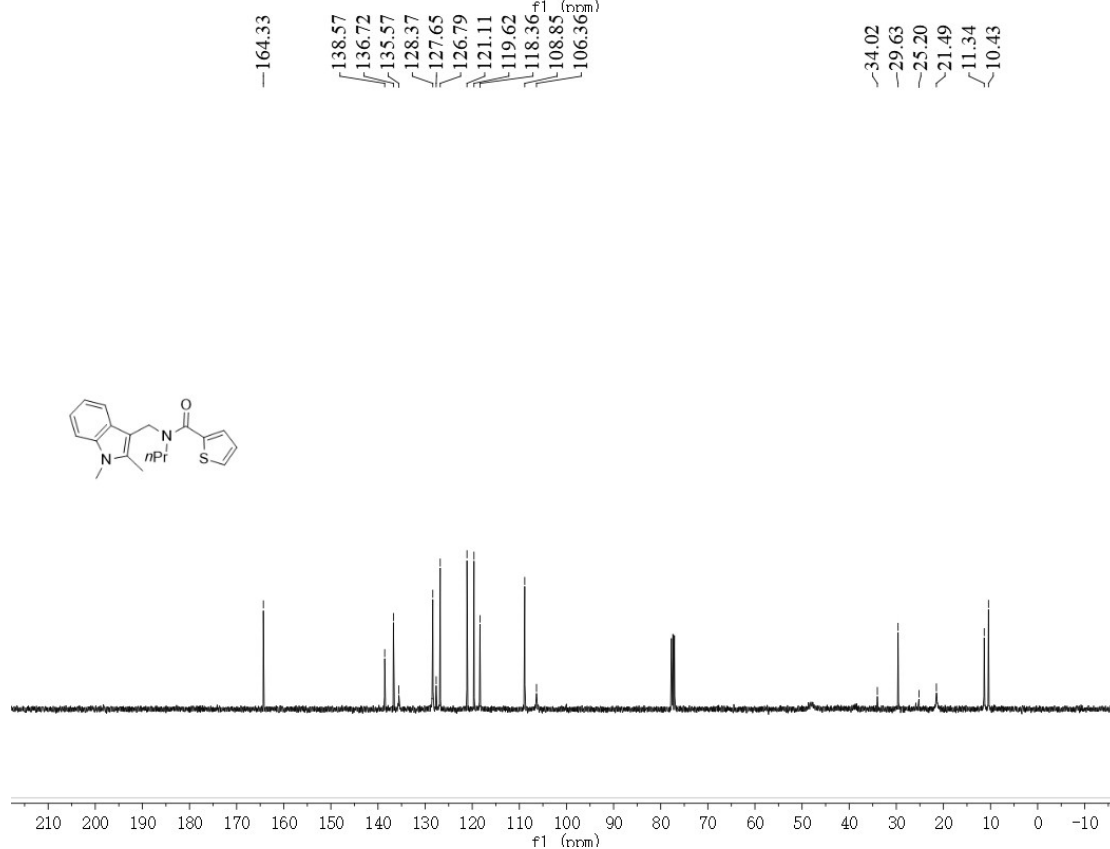

**N-((1,2-dimethyl-1H-indol-3-yl)methyl)-N-propylcinnamamide (5h)**

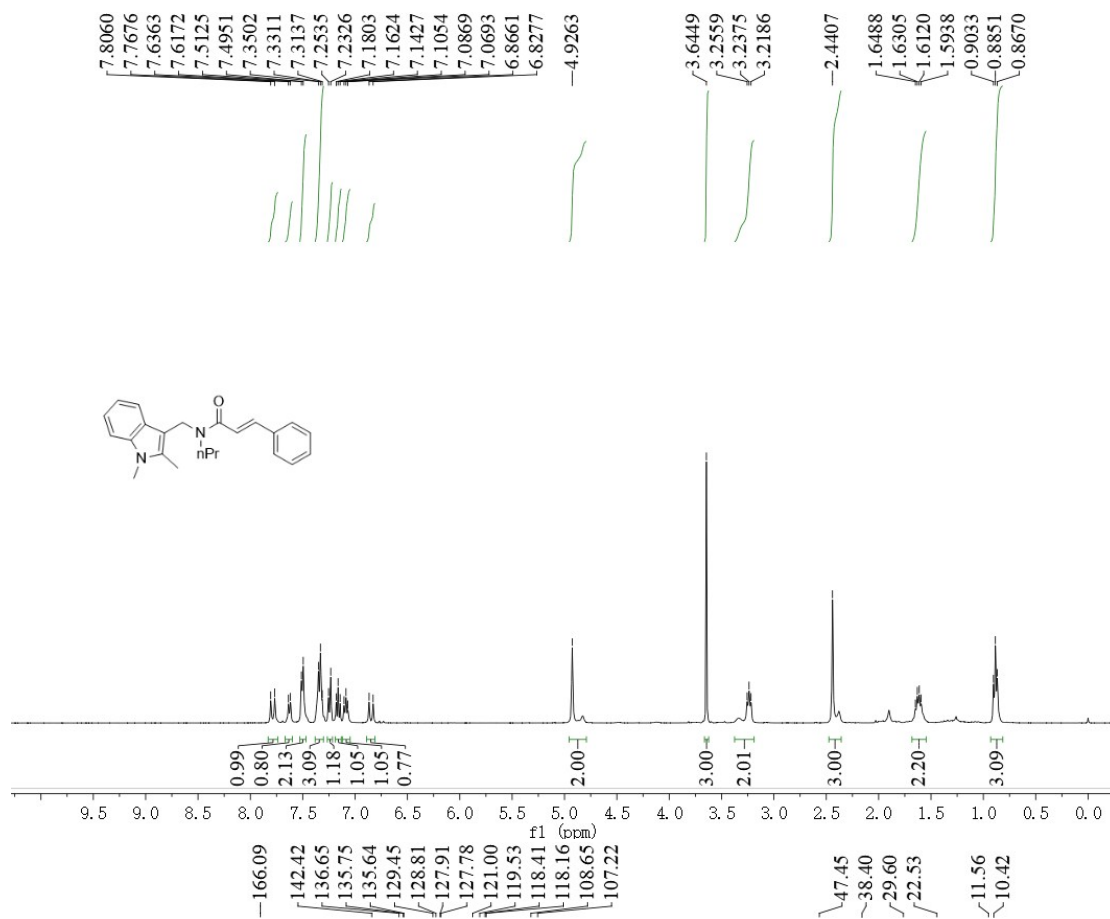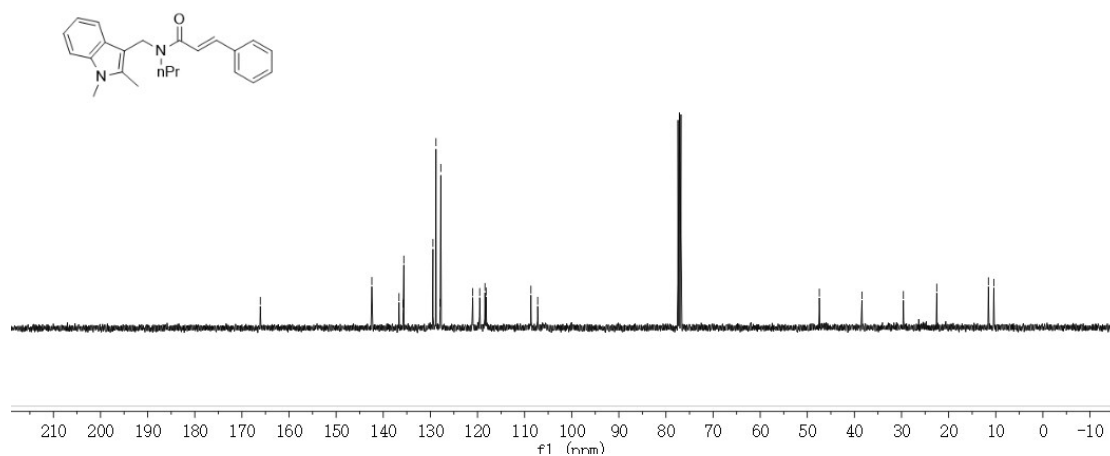

**N-((1,2-dimethyl-1H-indol-3-yl)methyl)-3-phenyl-N-propylpropiolamide (5i)**

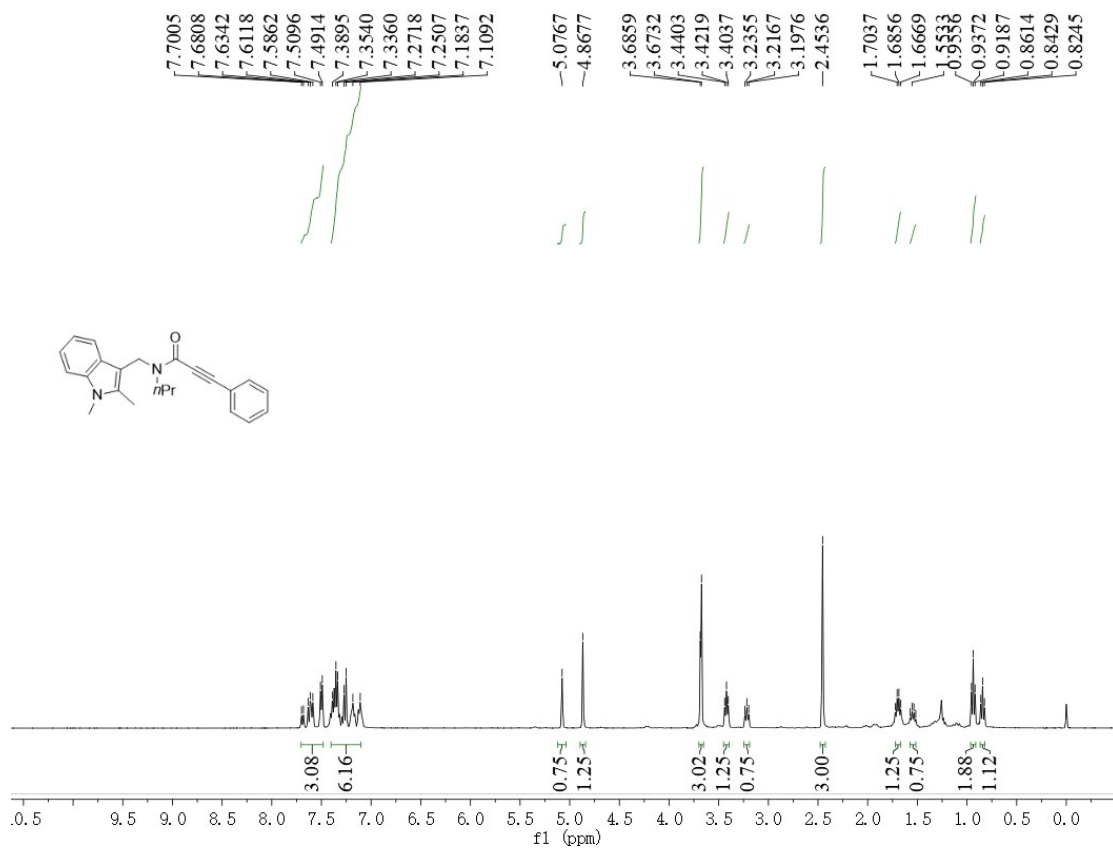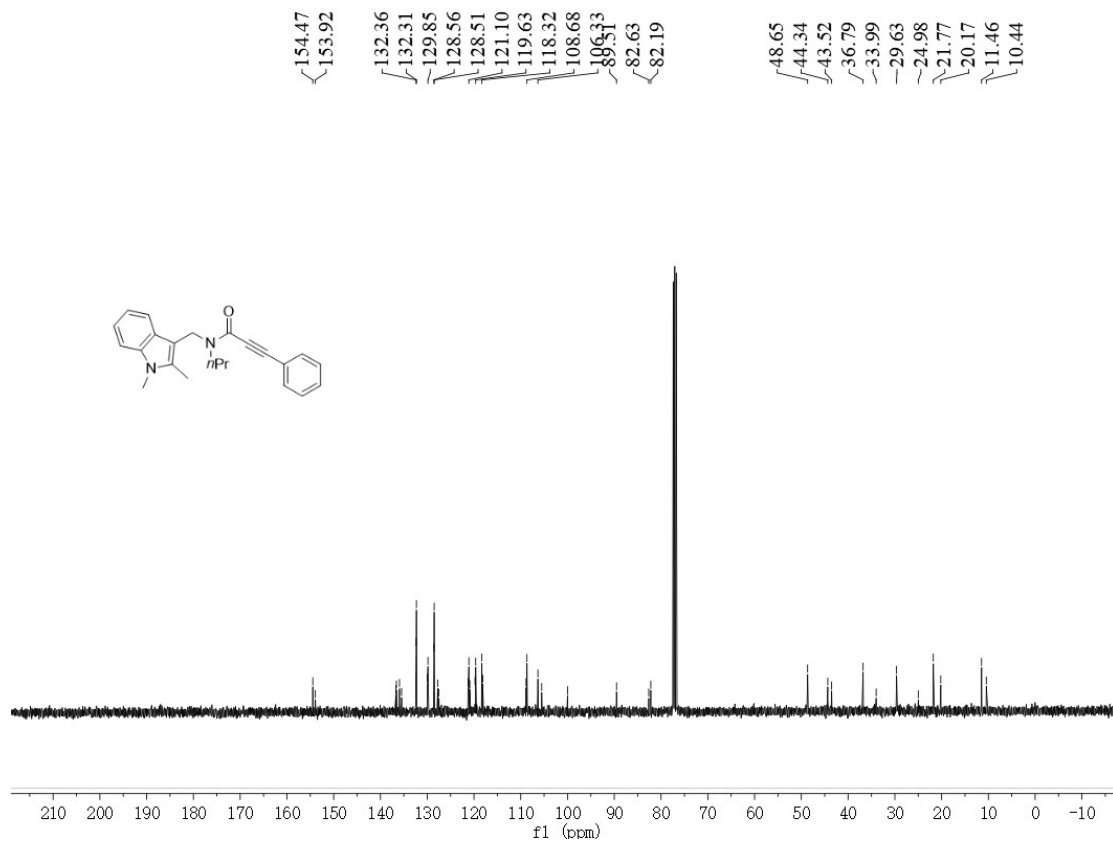

Phenyl ((1,2-dimethyl-1H-indol-3-yl)methyl)(propyl)carbamate (5j)



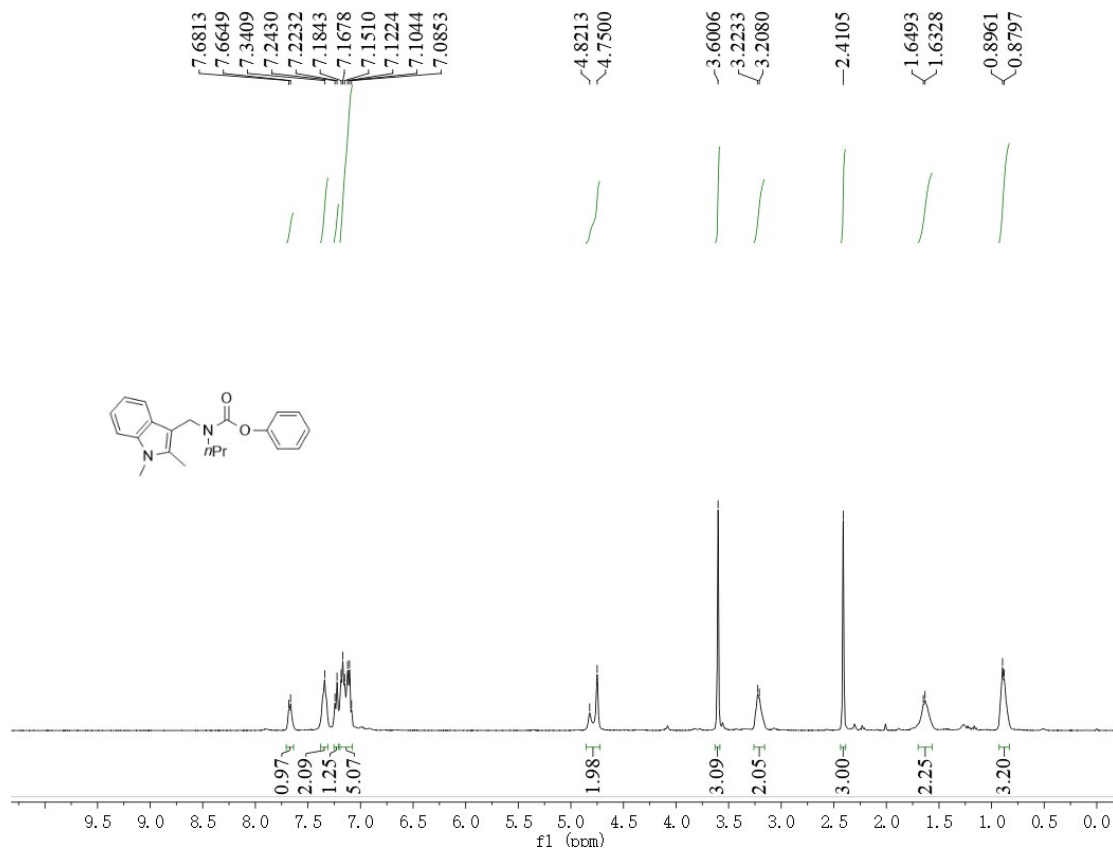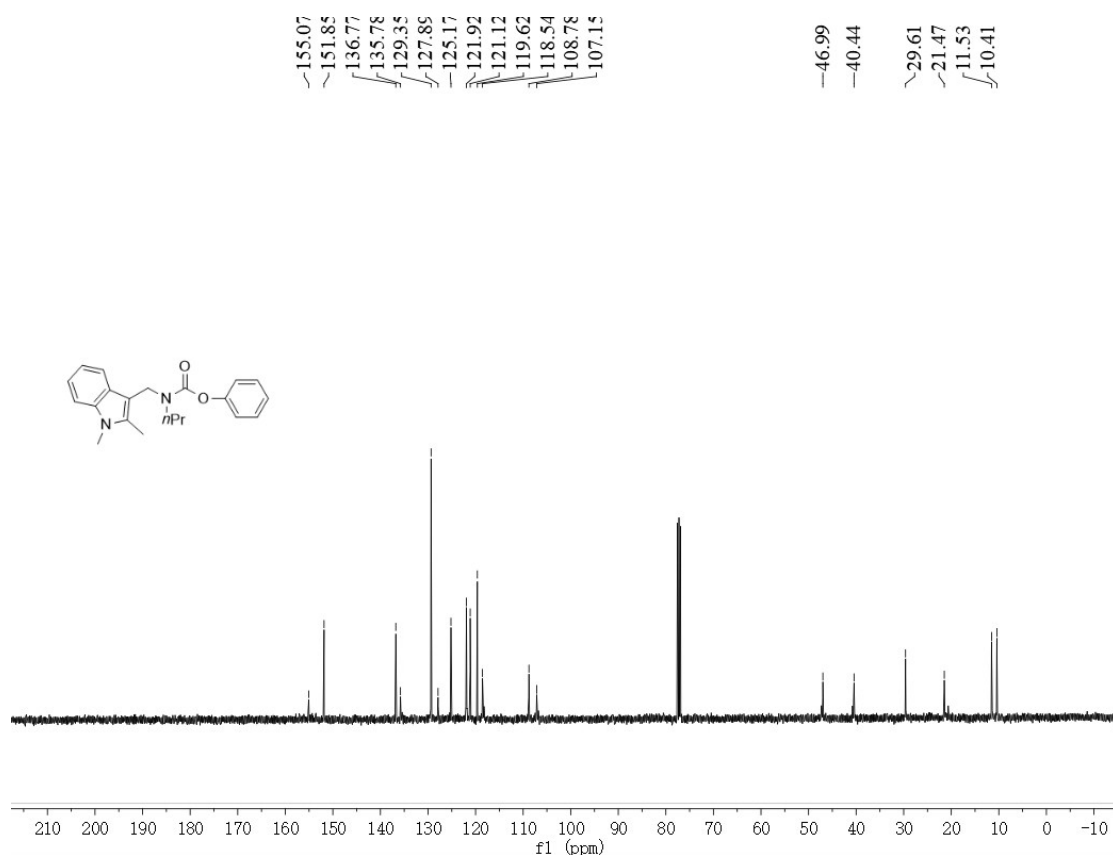

**N-(1-((1,2-dimethyl-1H-indol-3-yl)methyl)(propyl)amino)-1-oxopropan-2-ylbenzamide (5k)**

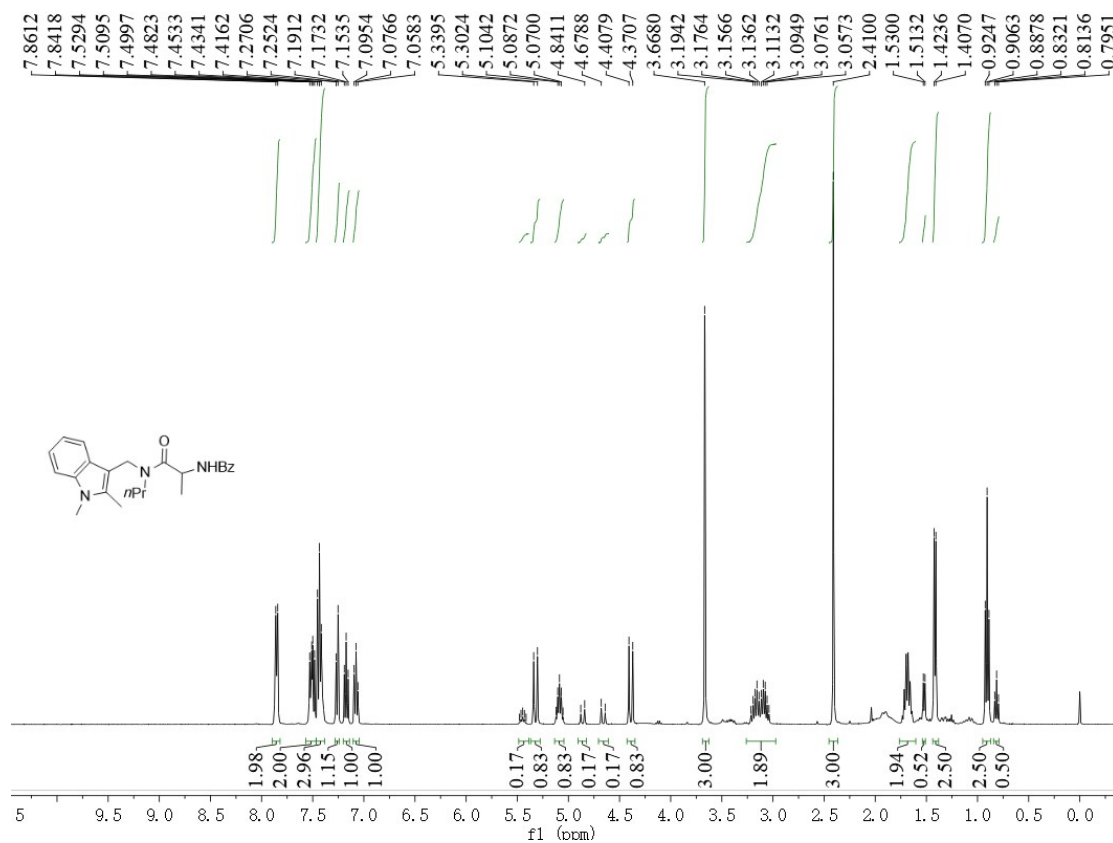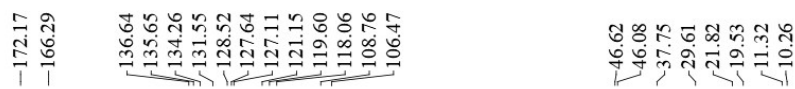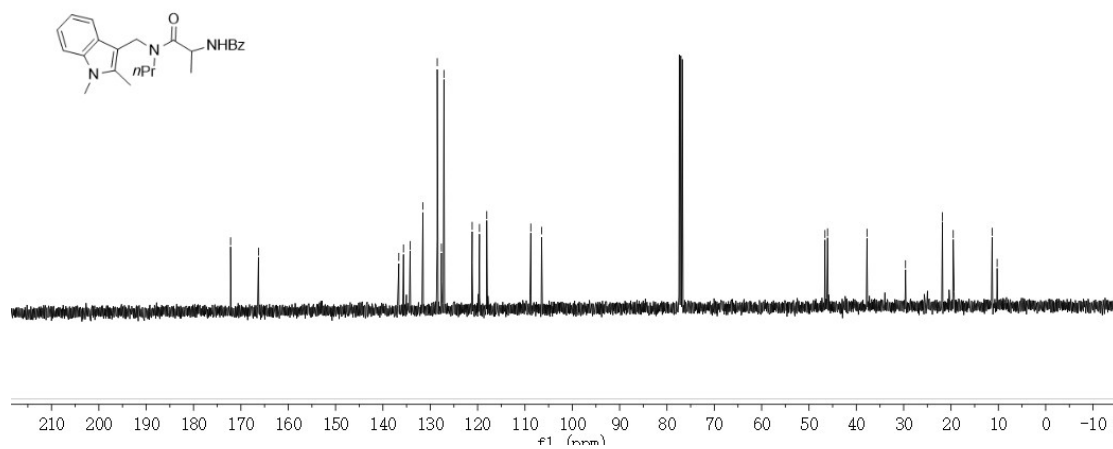

**Benzyl (1-(((1,2-dimethyl-1H-indol-3-yl)methyl)(propyl)amino)-1-oxopropan-2-yl)carbamate (5l)**

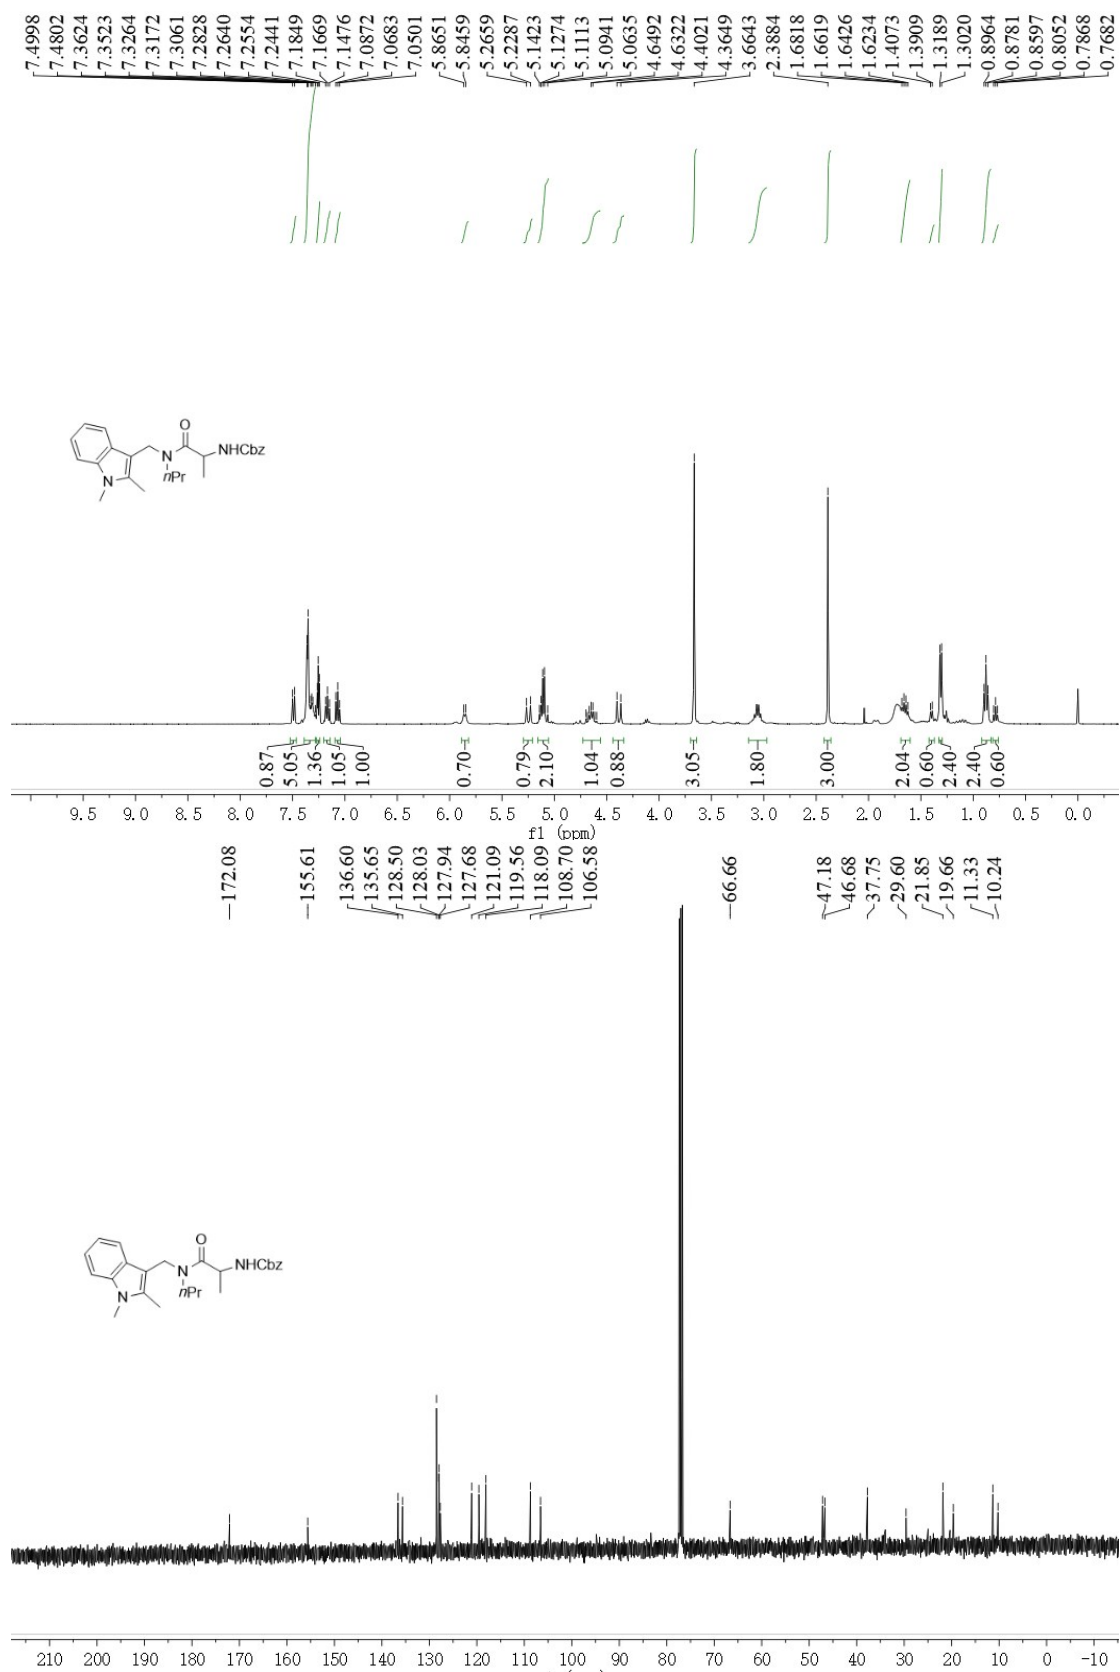

**N-((1,2-dimethyl-1H-indol-3-yl)methyl)-2-hydroxy-3-phenyl-N-propylpropanamide (5m)**

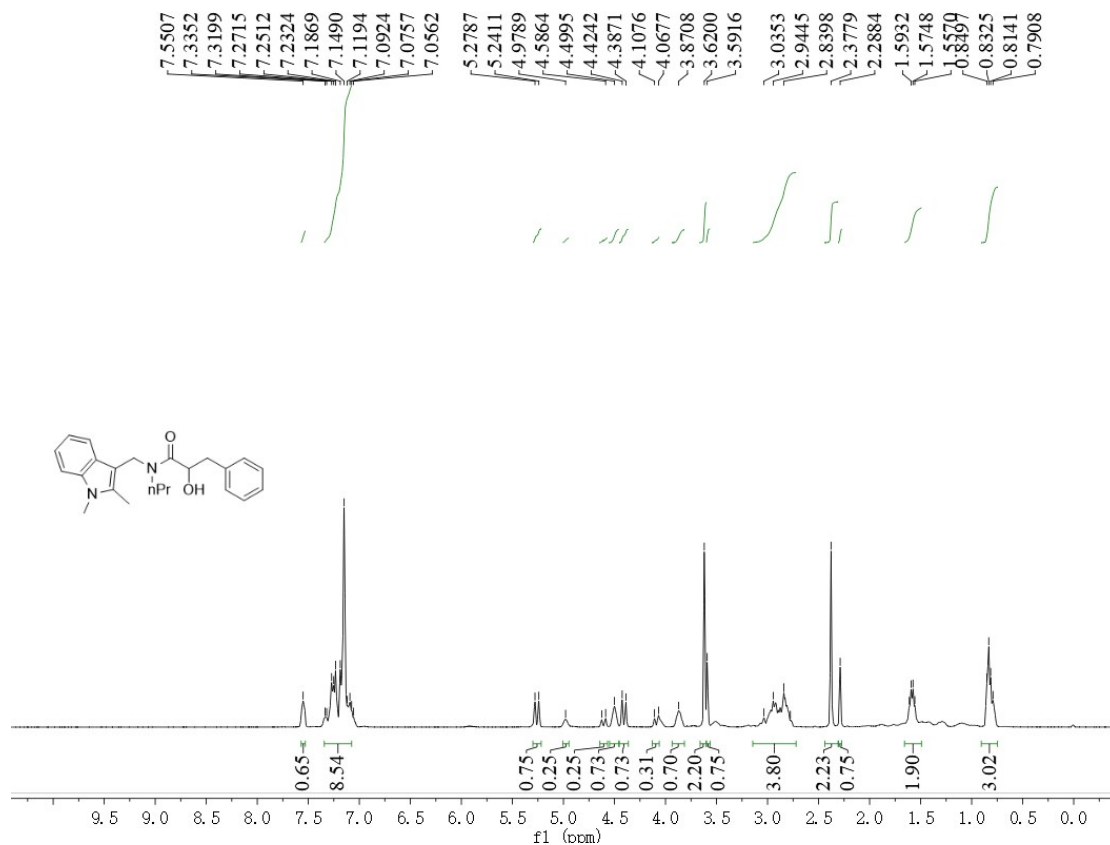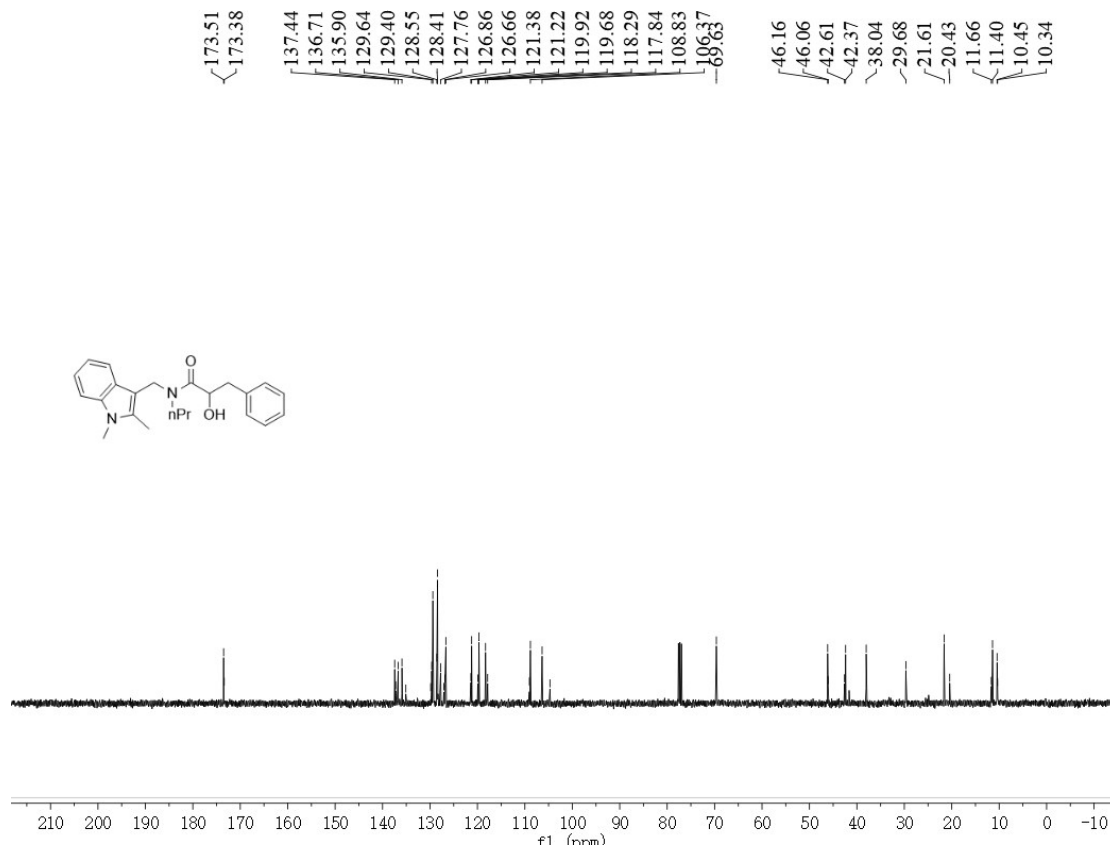

**N-((1,2-dimethyl-1H-indol-3-yl)methyl)-N-propylcyclohexanecarboxamide (5n)**

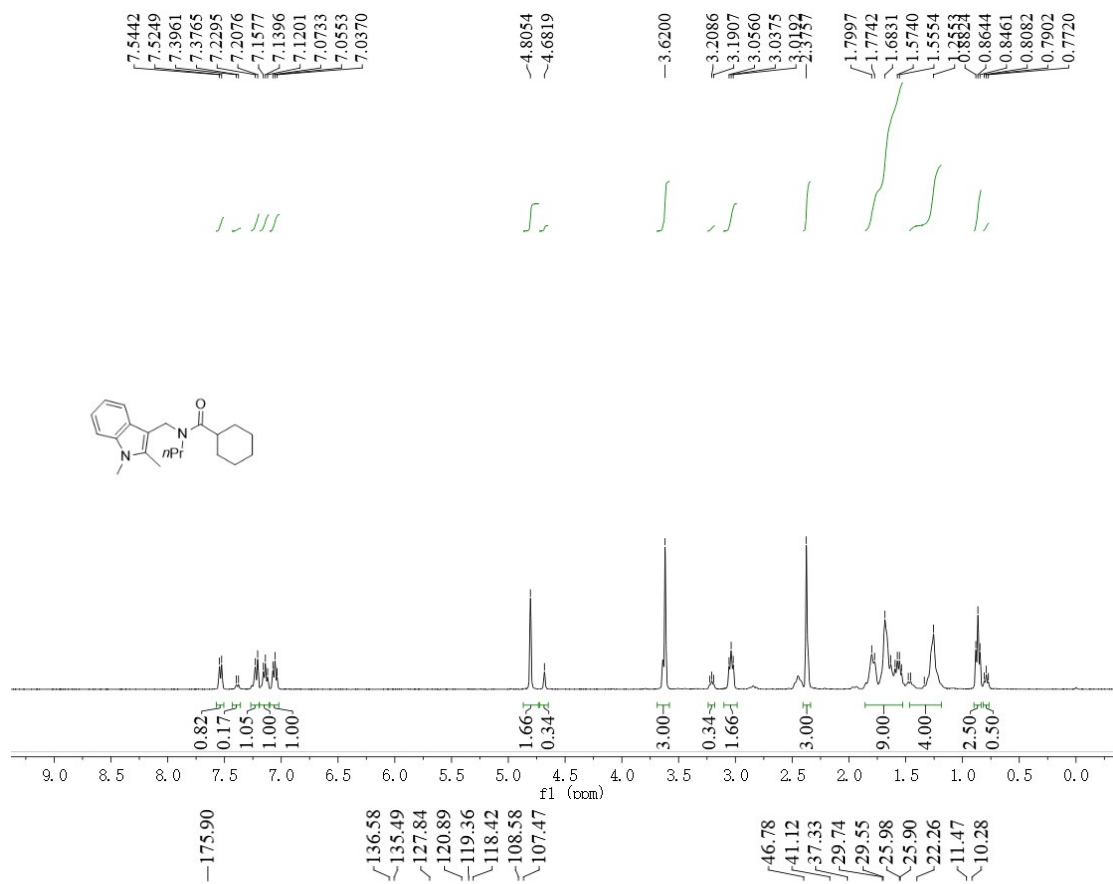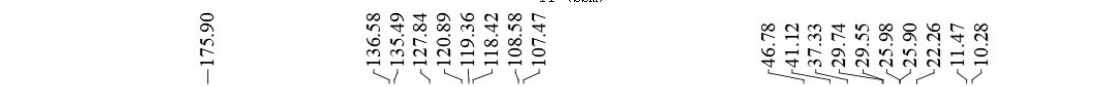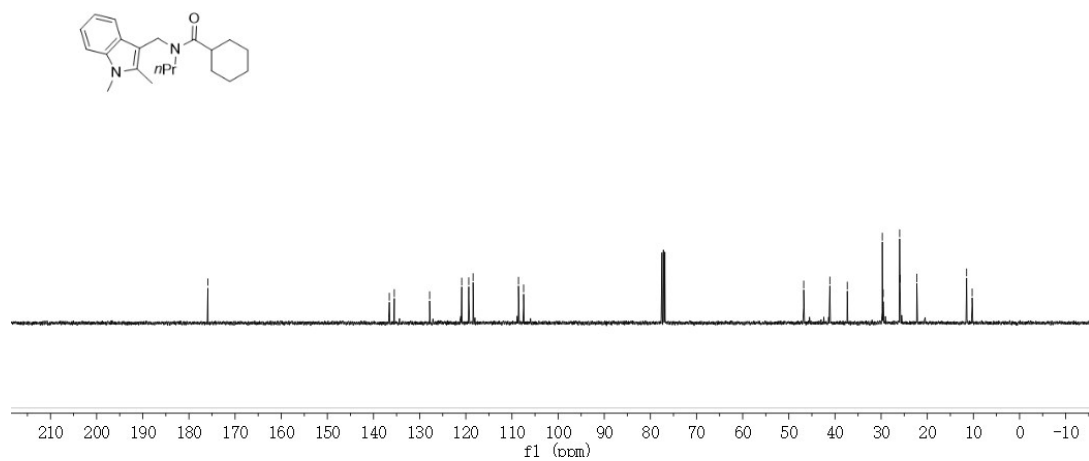

**N-((1,2-dimethyl-1H-indol-3-yl)methyl)-2,2,2-trifluoro-N-propylacetamide (5o)**

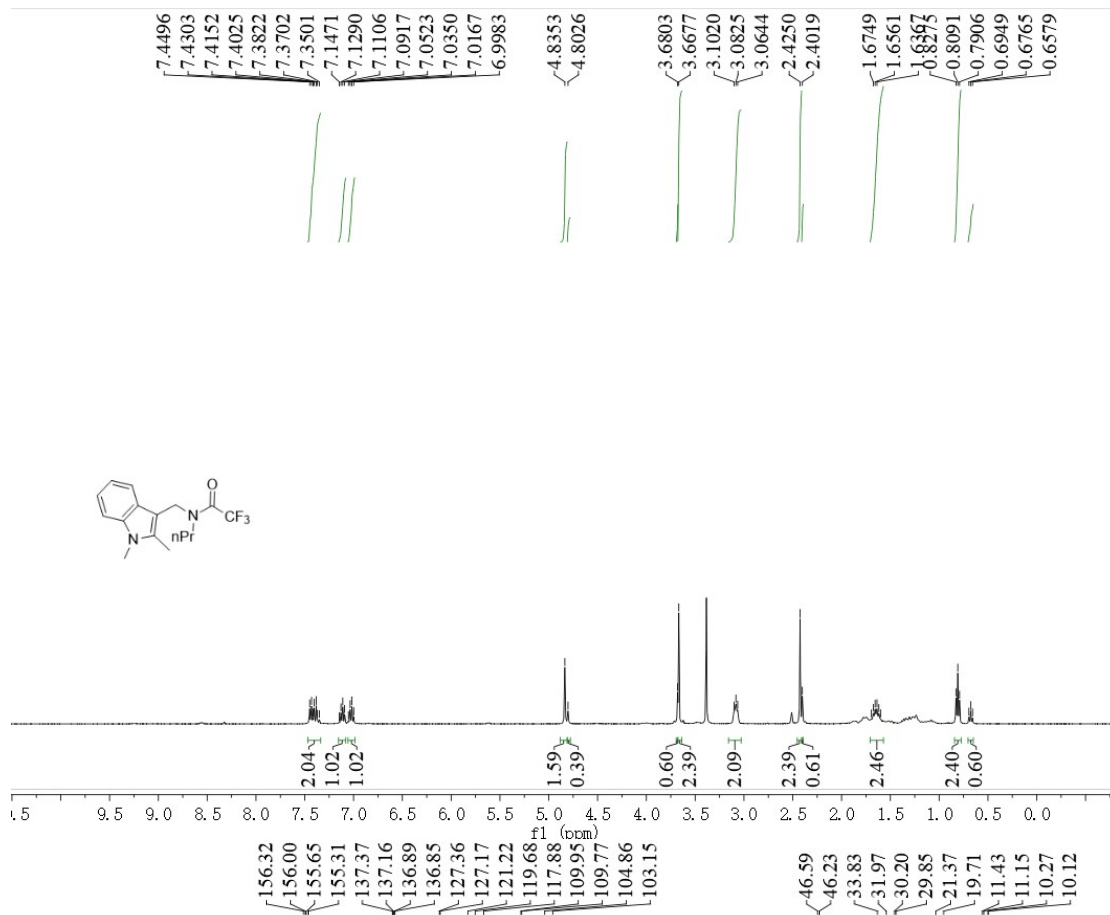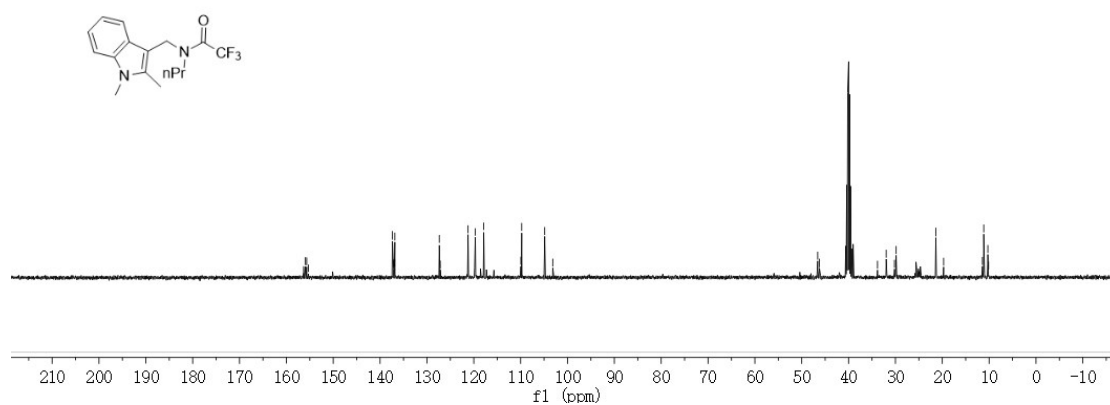

**N-((1,2-dimethyl-1H-indol-3-yl)methyl)benzamide (5p)**

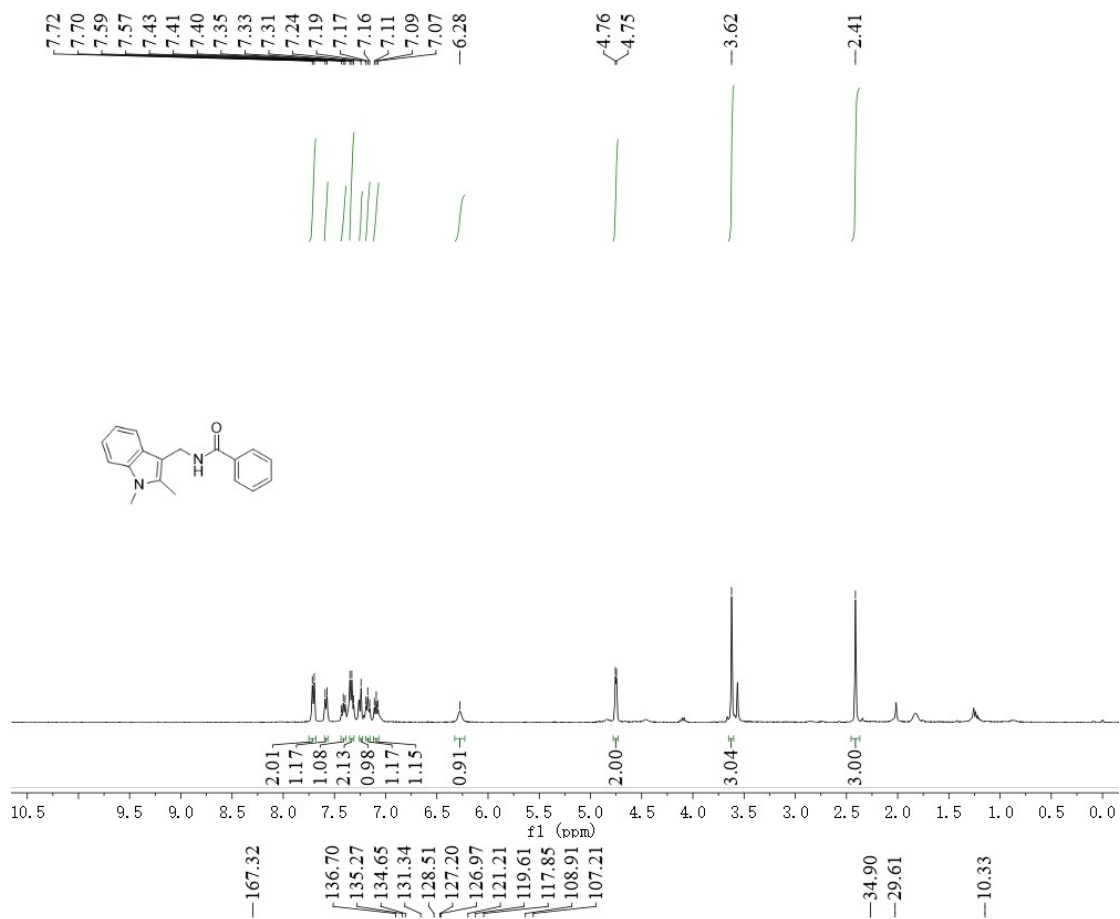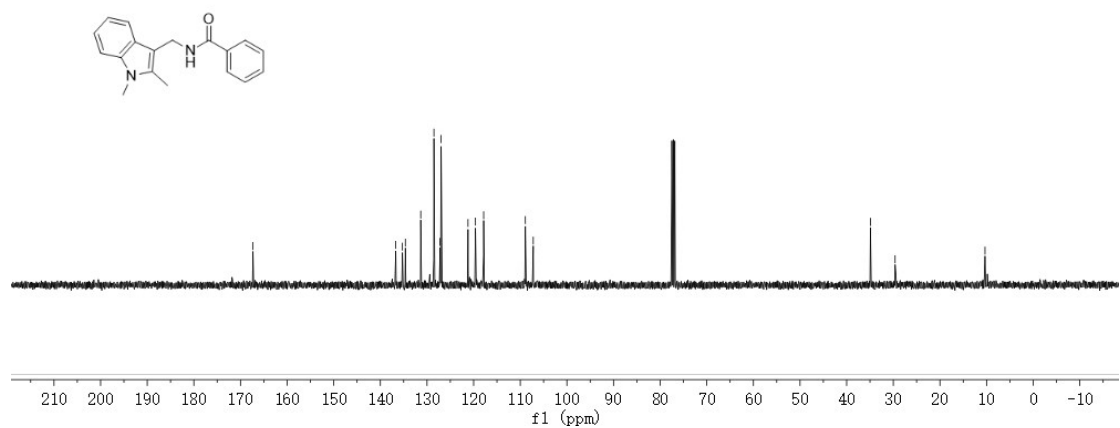

**N-((1,2-dimethyl-1H-indol-3-yl)methyl)-N-methylbenzamide (5q)**

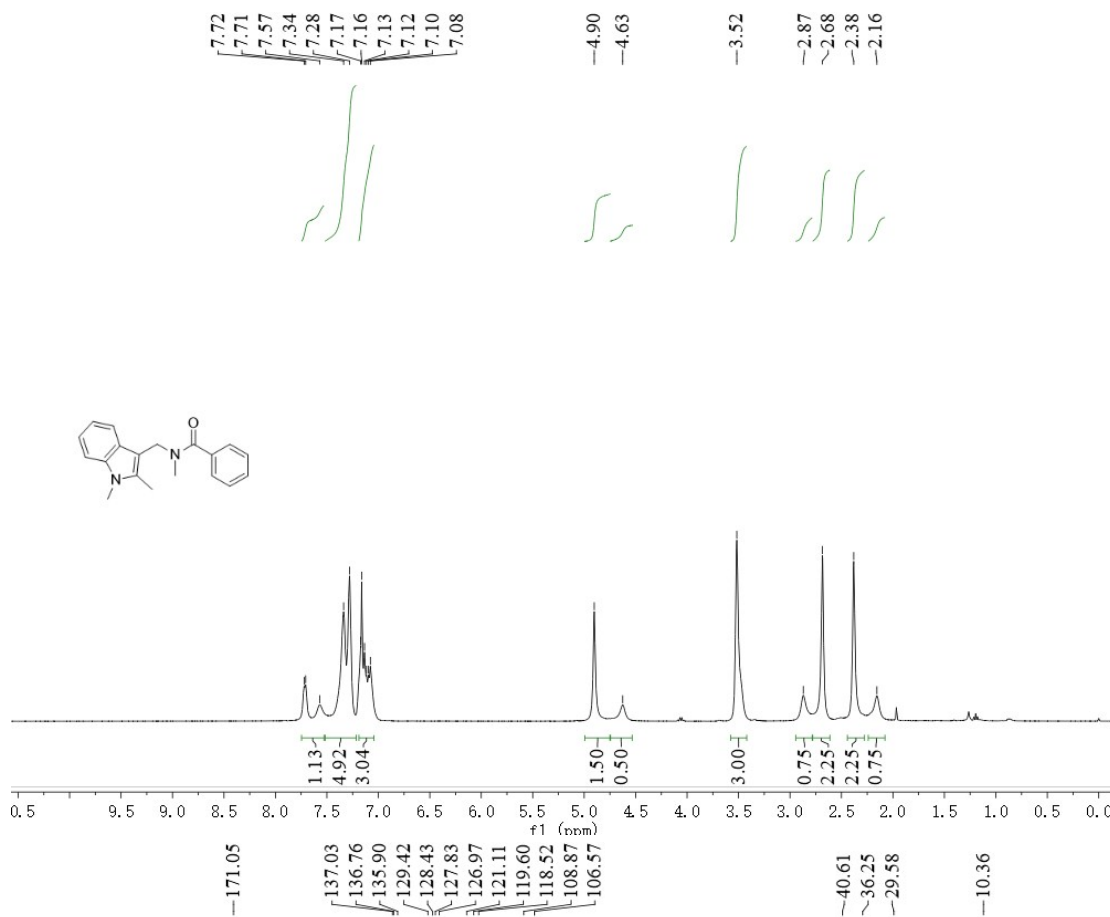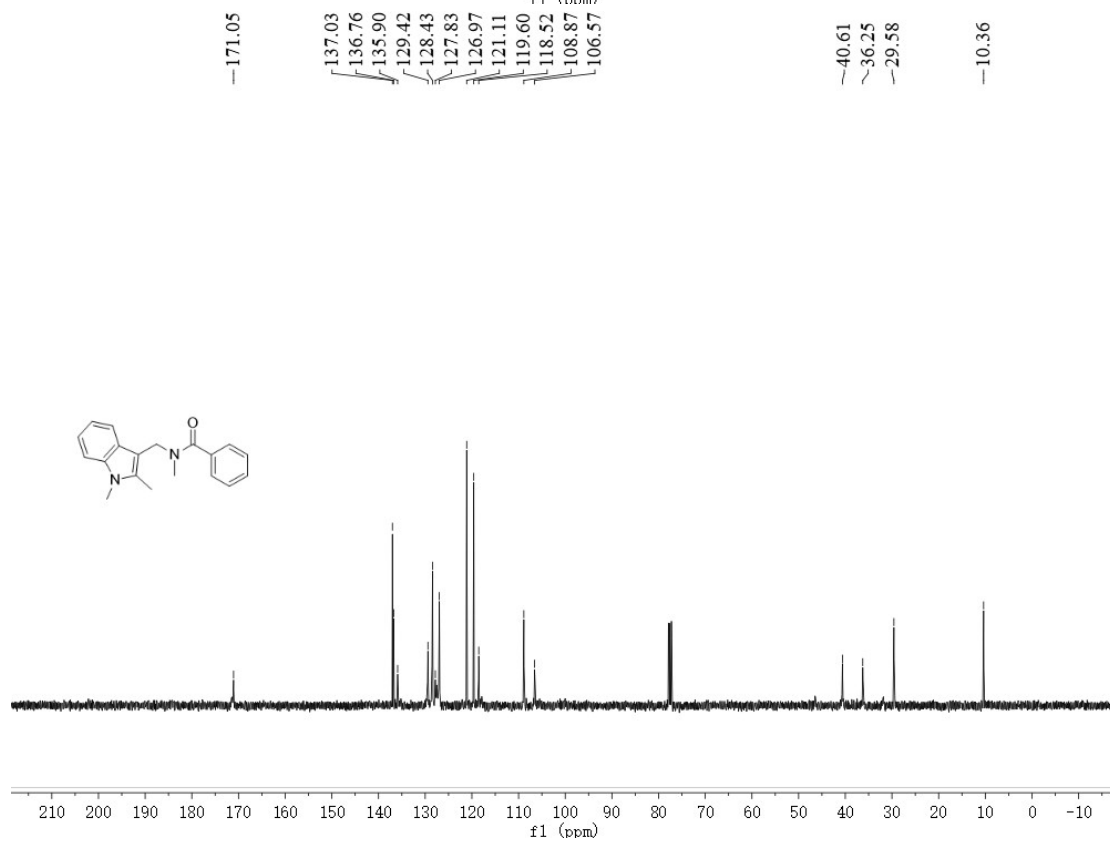

**N-((1,2-dimethyl-1H-indol-3-yl)methyl)-N-phenylbenzamide (5r)**



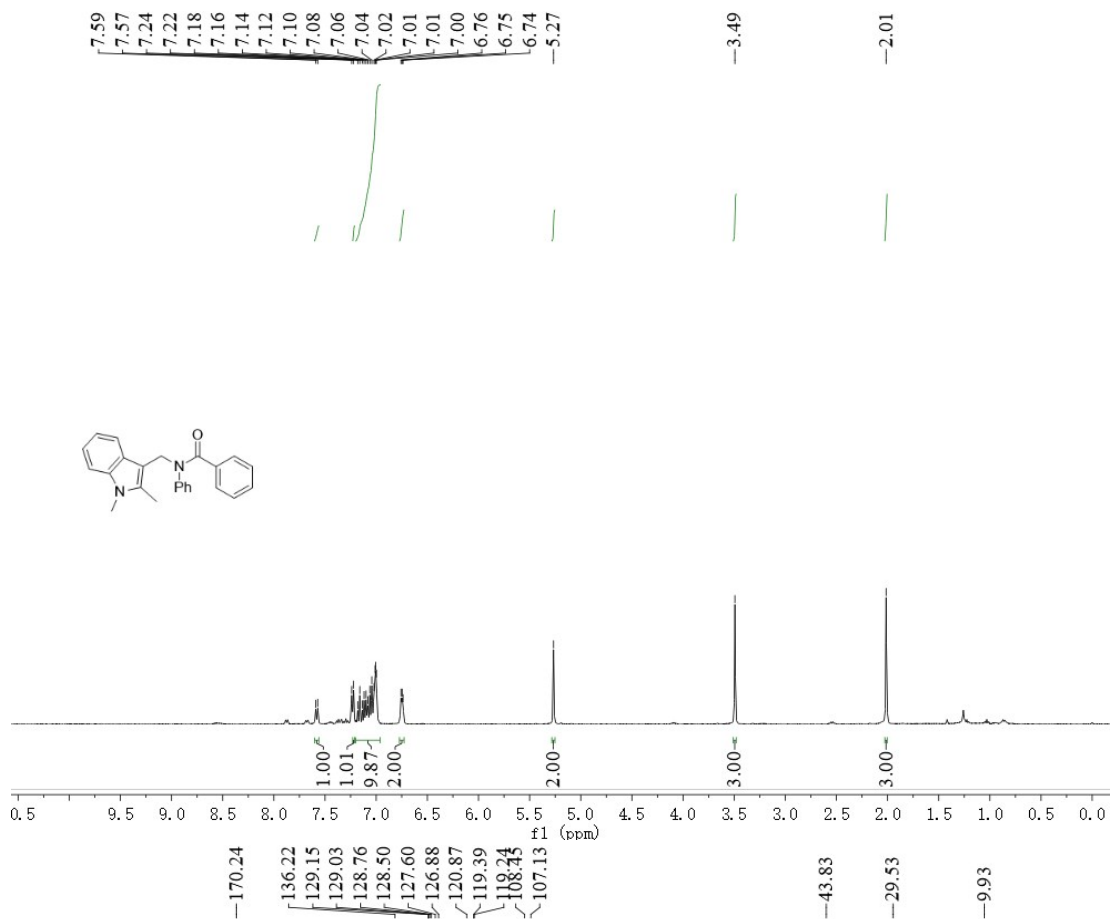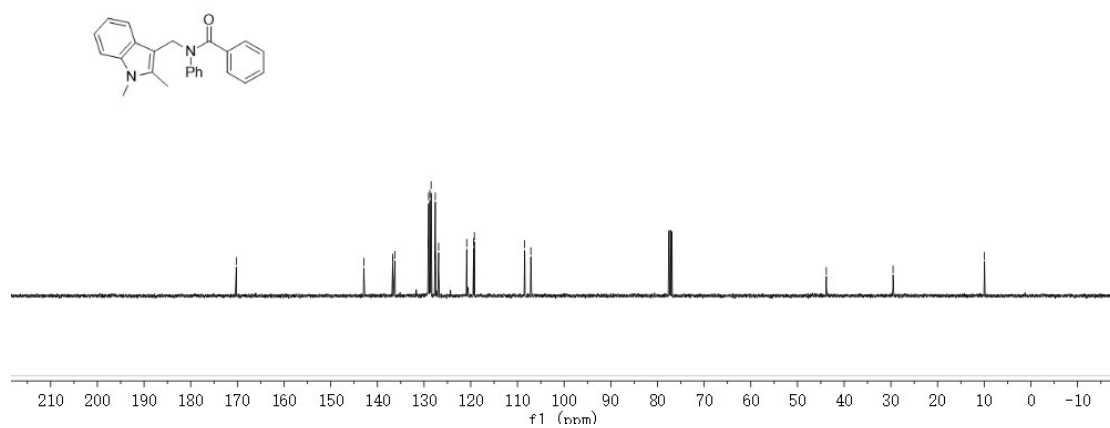

**N-benzyl-N-((1,2-dimethyl-1H-indol-3-yl)methyl)benzamide (5s)**

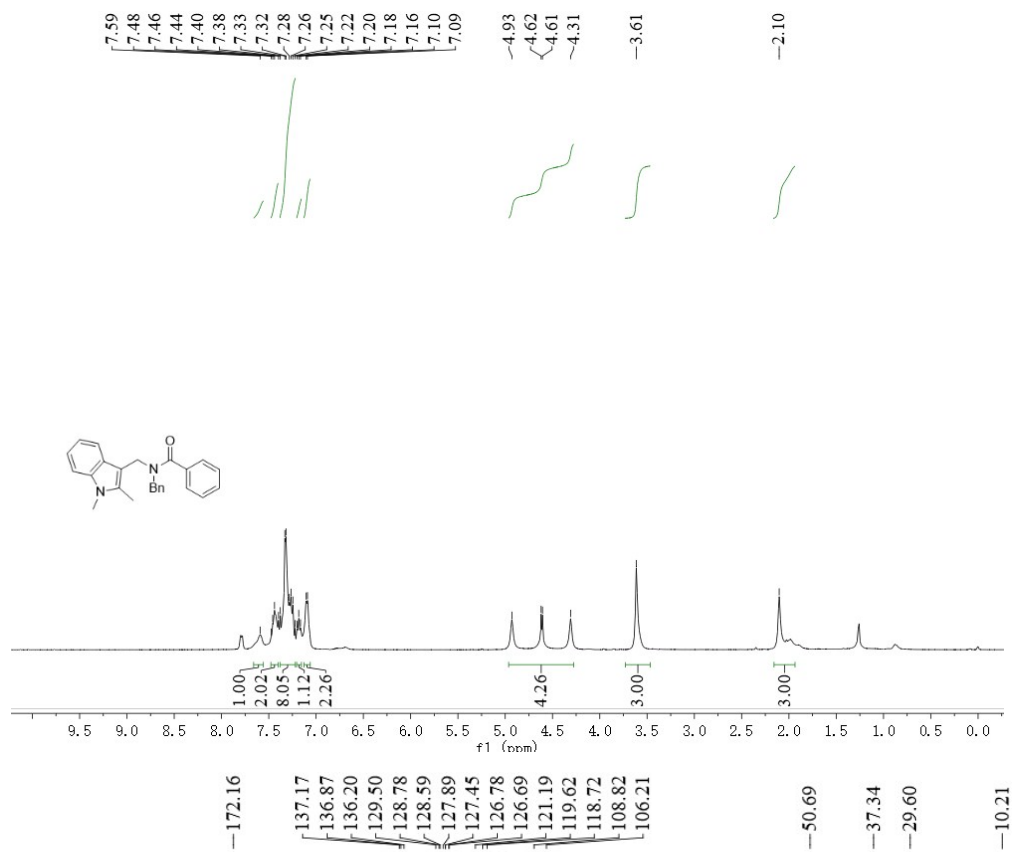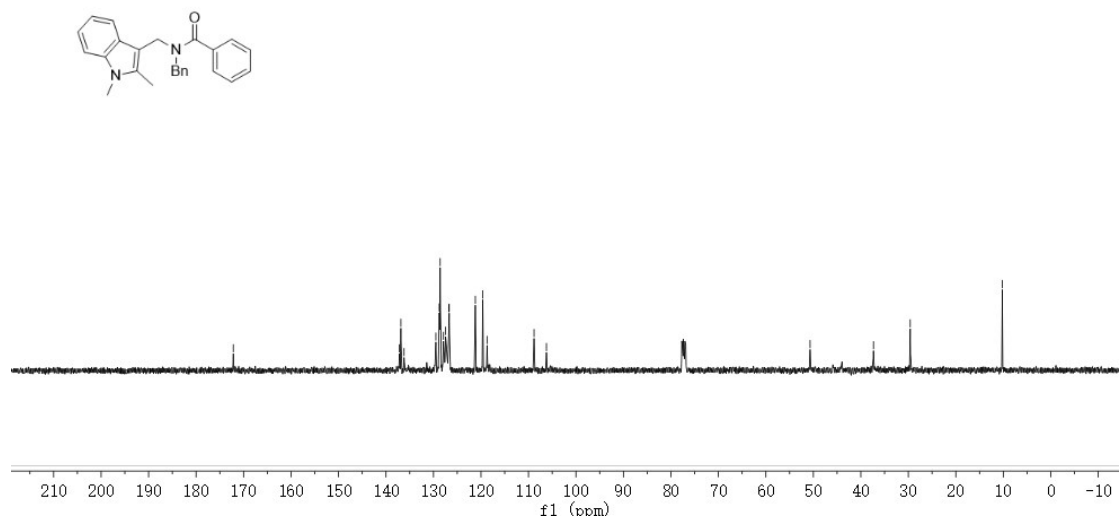

N-((1-methyl-1H-indol-3-yl)methyl)-N-propylbenzamide (5aa)

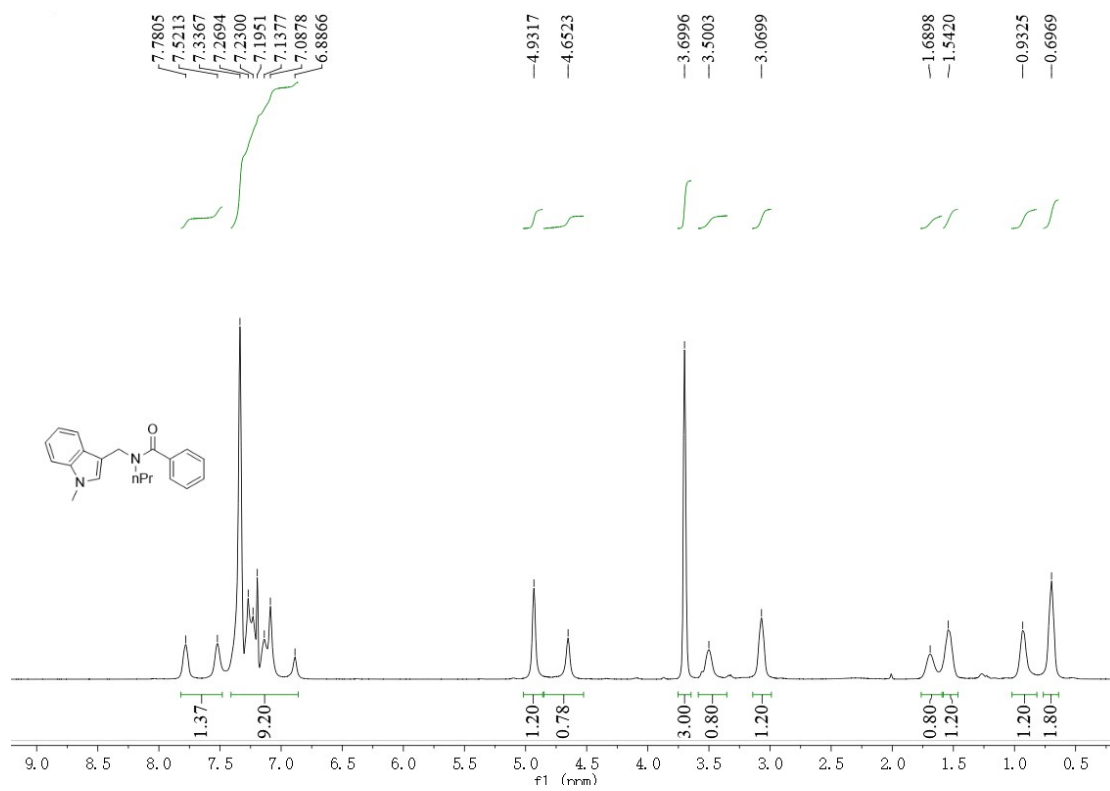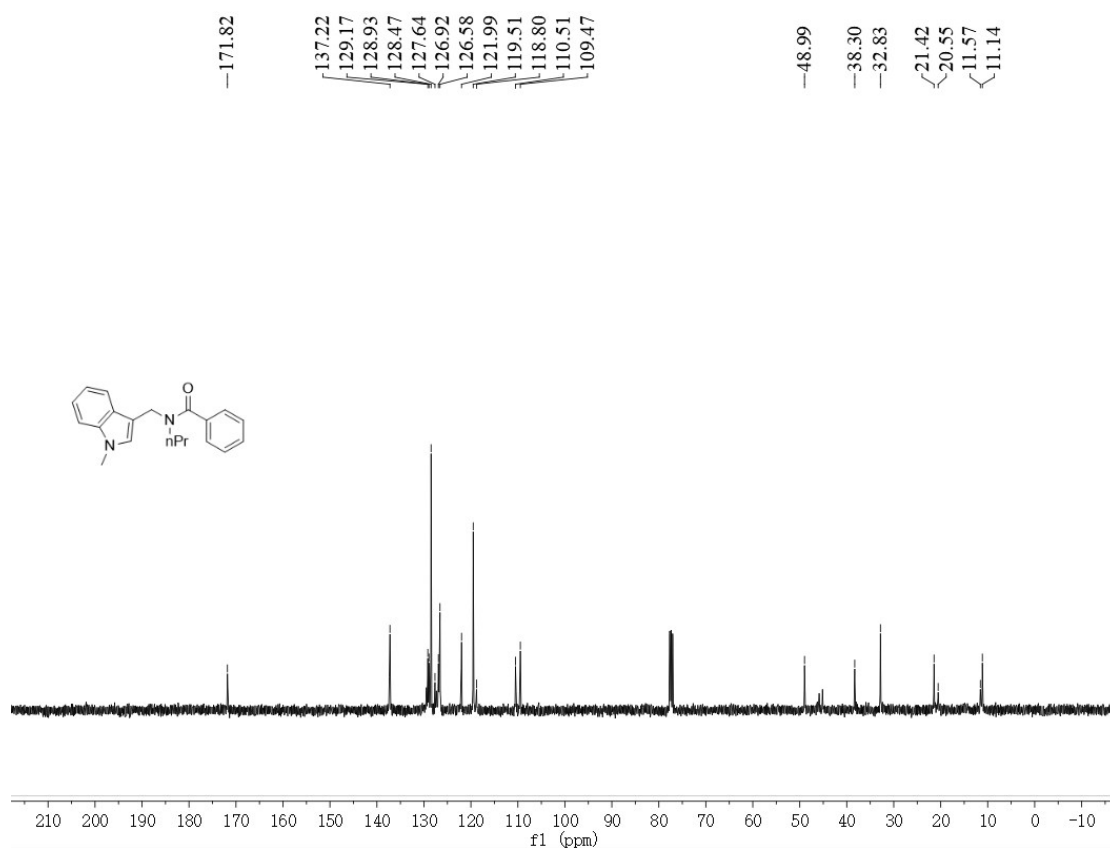

**N-propyl-N-((1,2,5-trimethyl-1H-indol-3-yl)methyl)benzamide (5ab)**

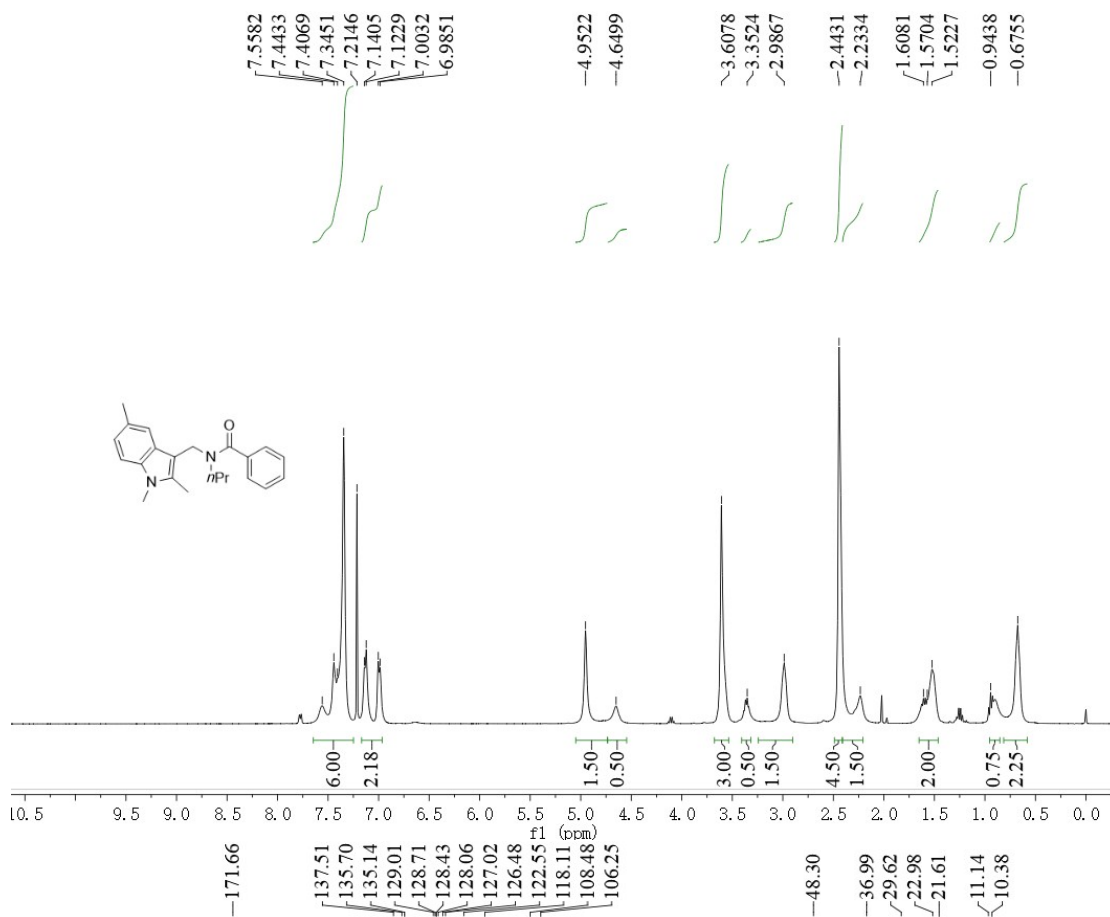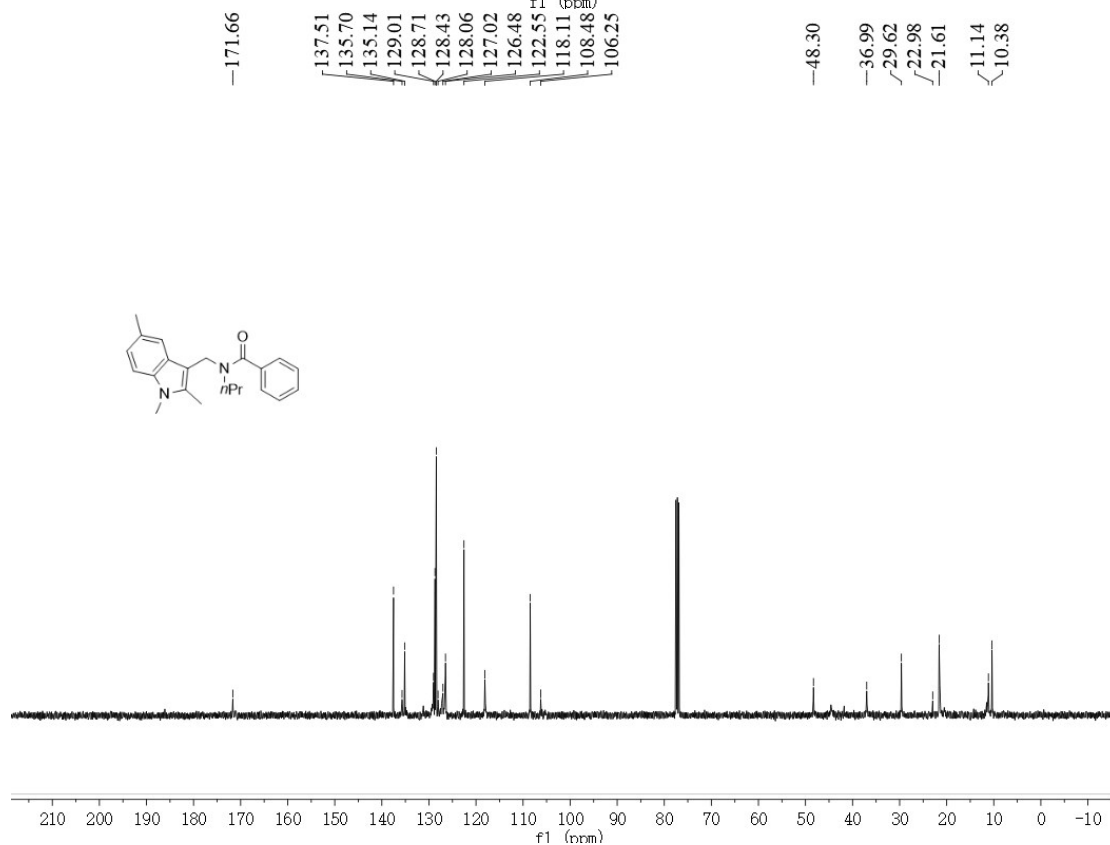

**N-((1,2-dimethyl-5-nitro-1H-indol-3-yl)methyl)-N-propylbenzamide (5ac)**

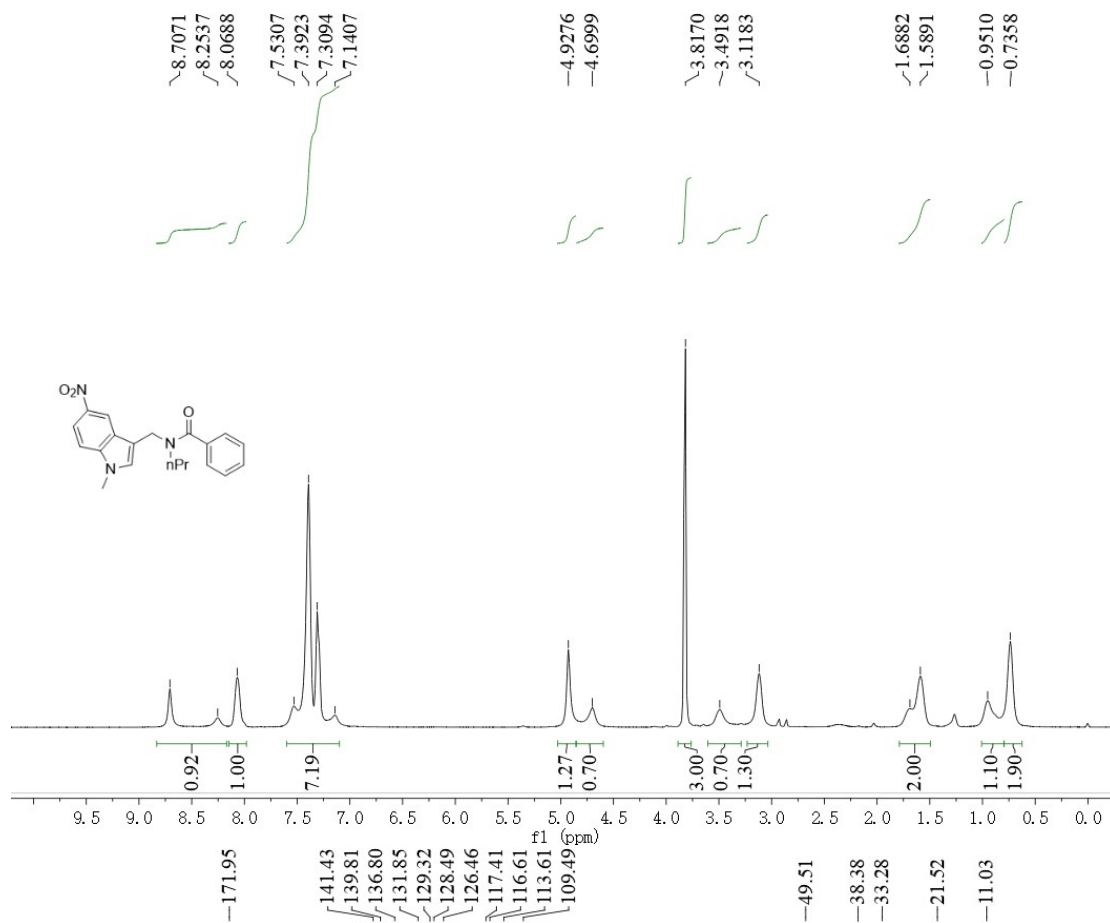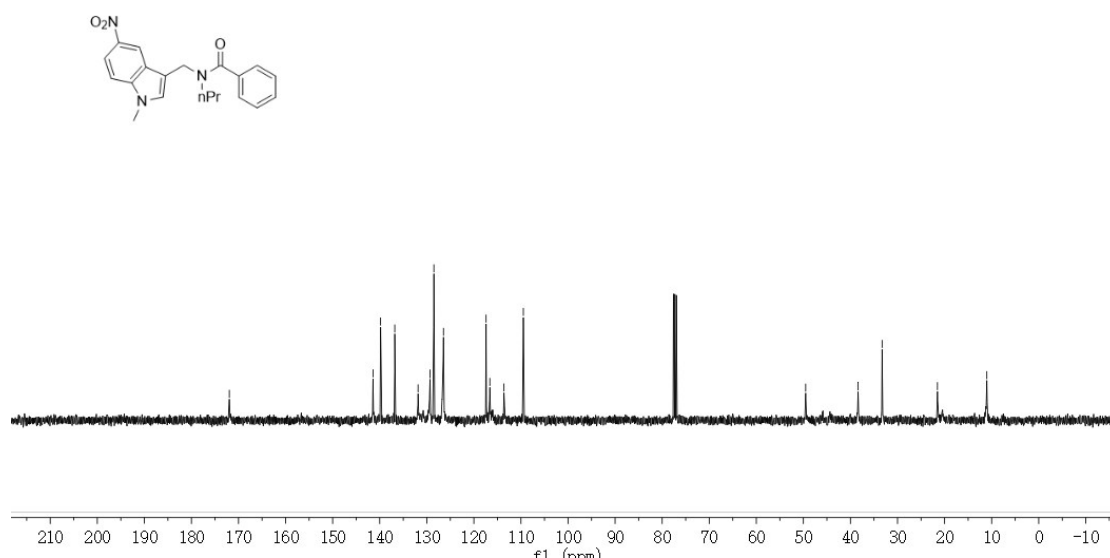

**N-((5-fluoro-1,2-dimethyl-1H-indol-3-yl)methyl)-N-propylbenzamide (5ad)**

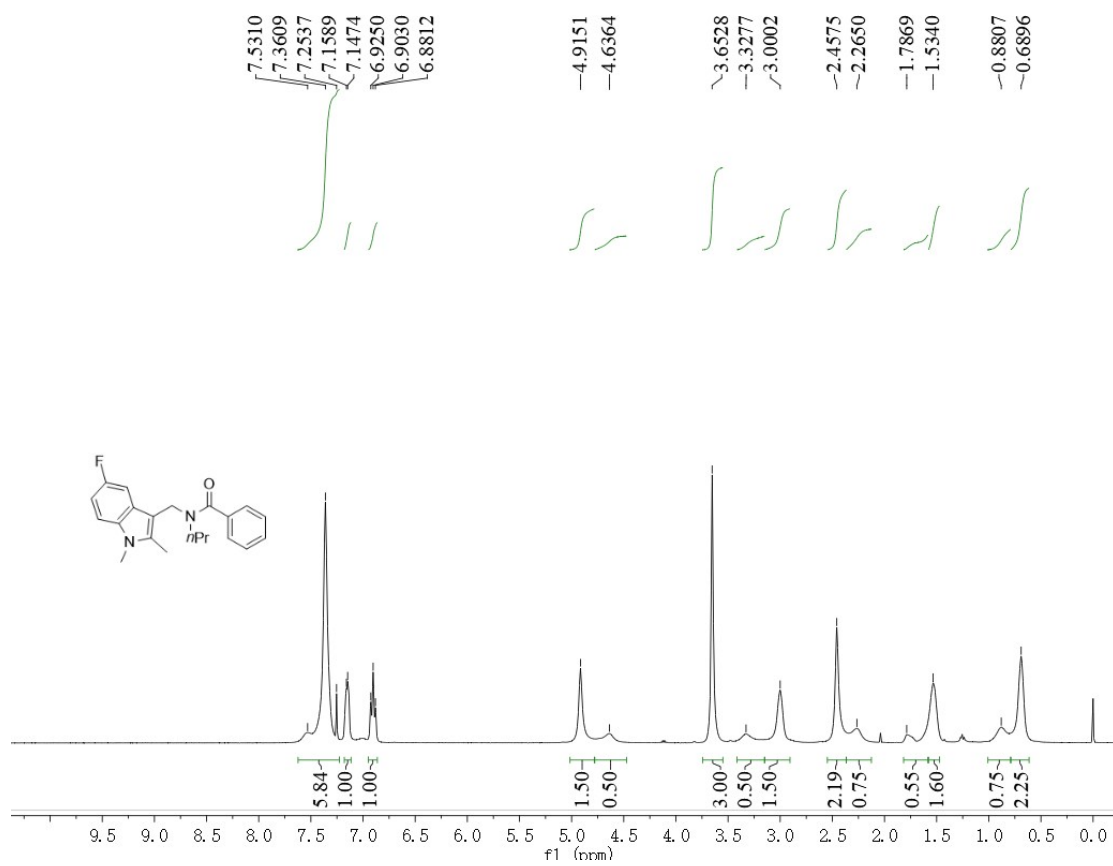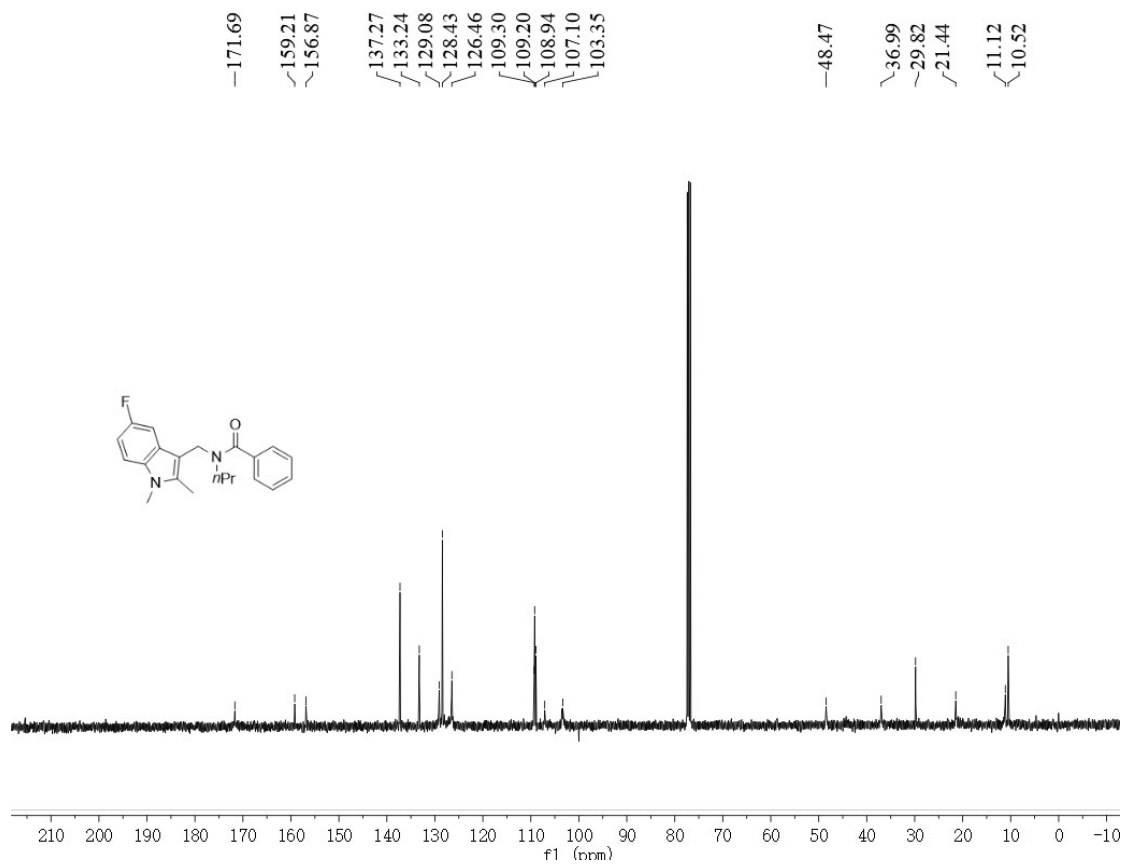

N-benzyl-N-propylbenzamide (5ae)

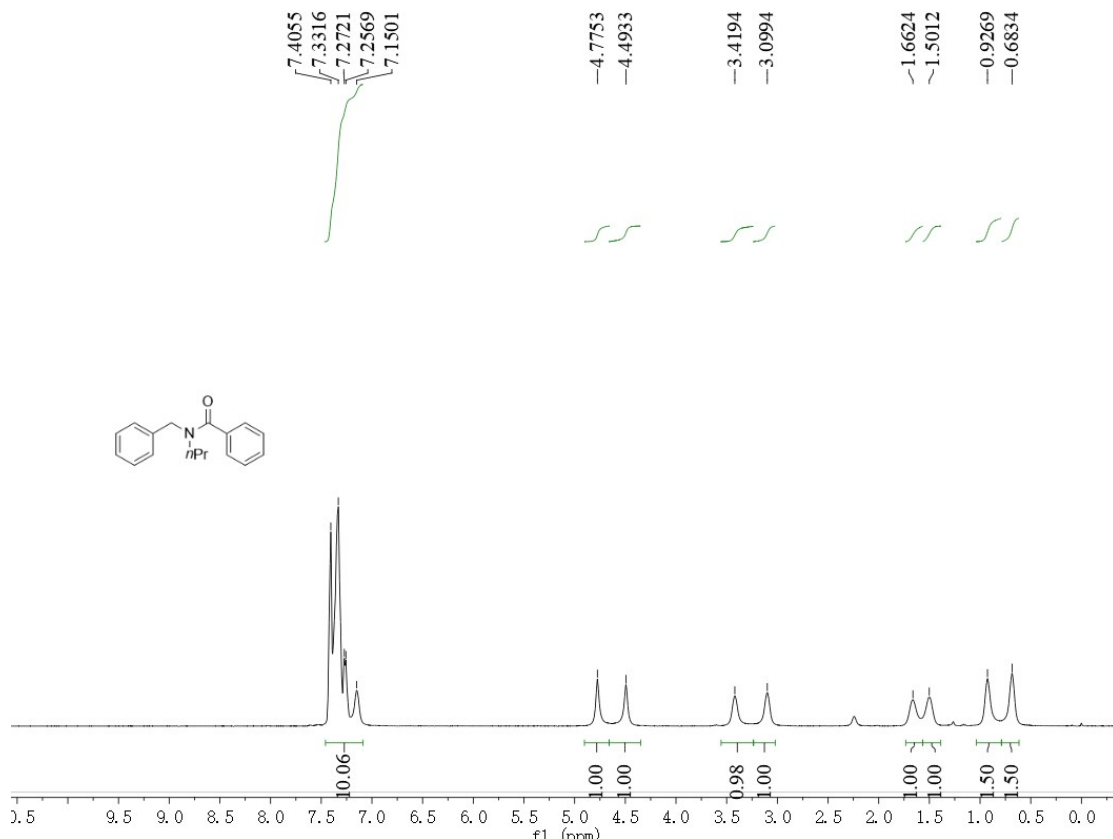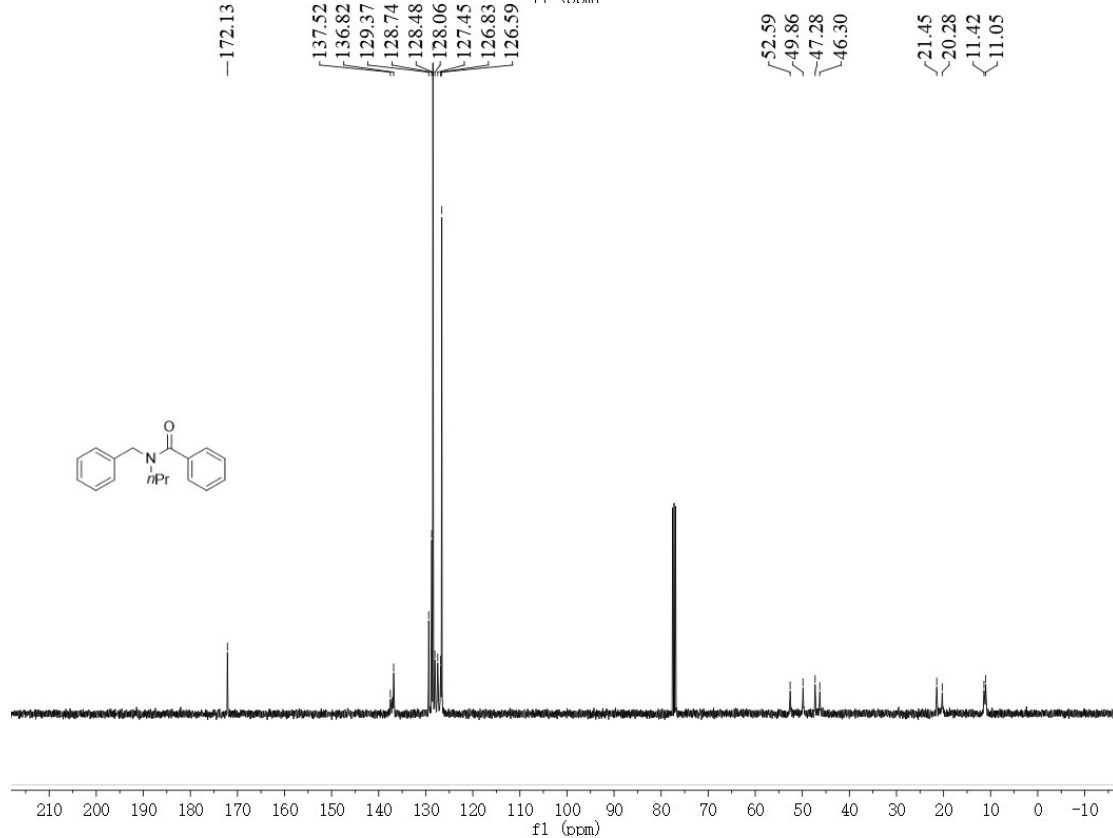

**N-(4-hydroxybenzyl)-N-propylbenzamide (5af)**

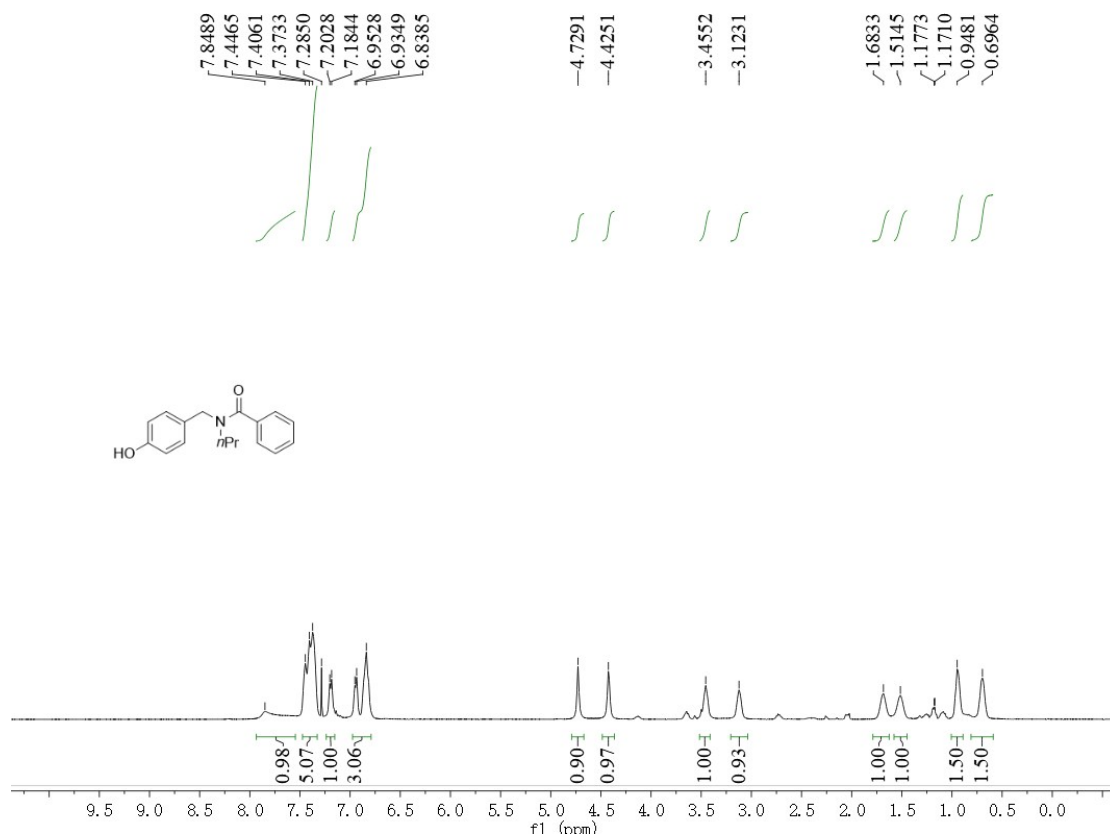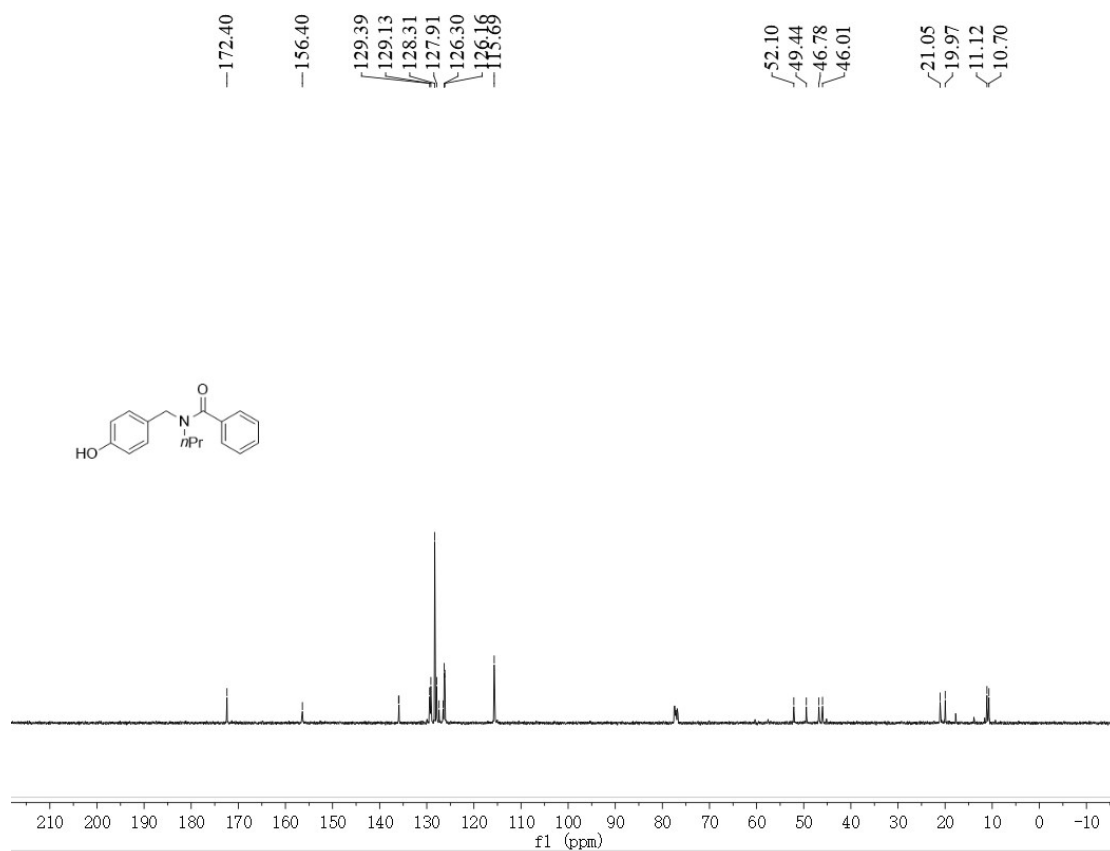

**N-(4-methylbenzyl)-N-propylbenzamide (5ag)**



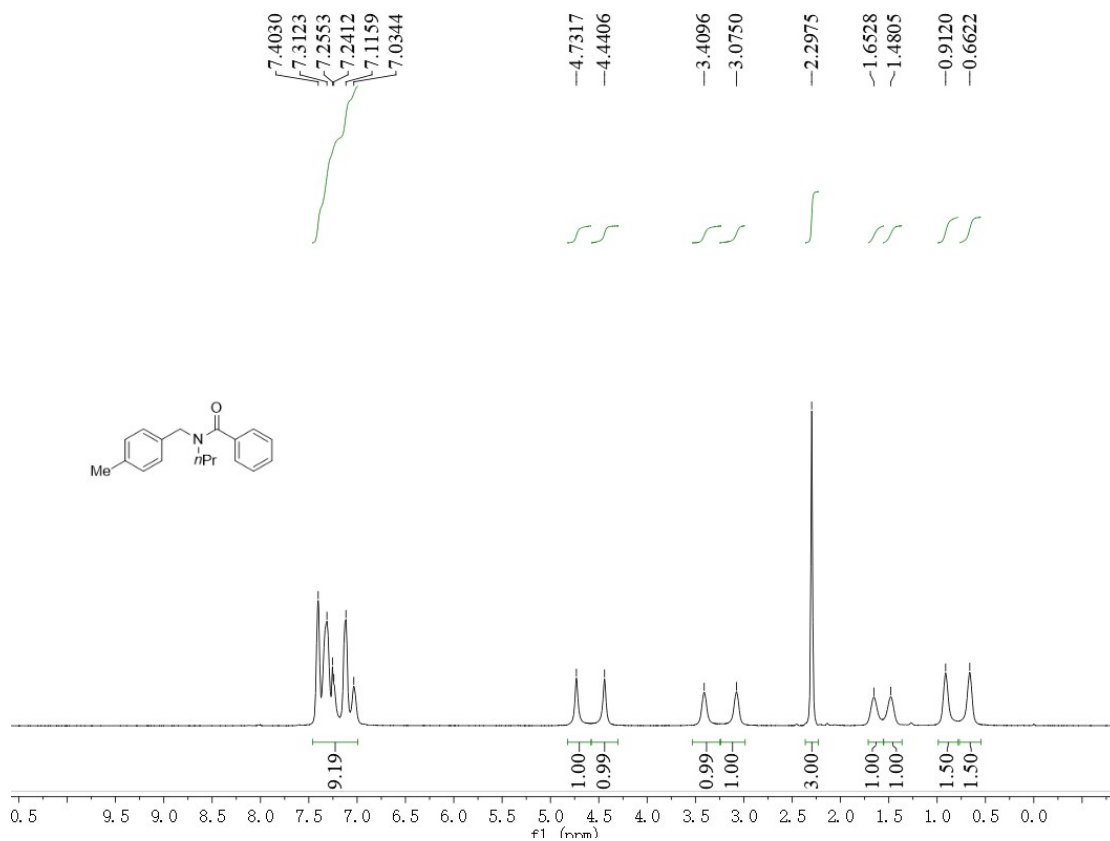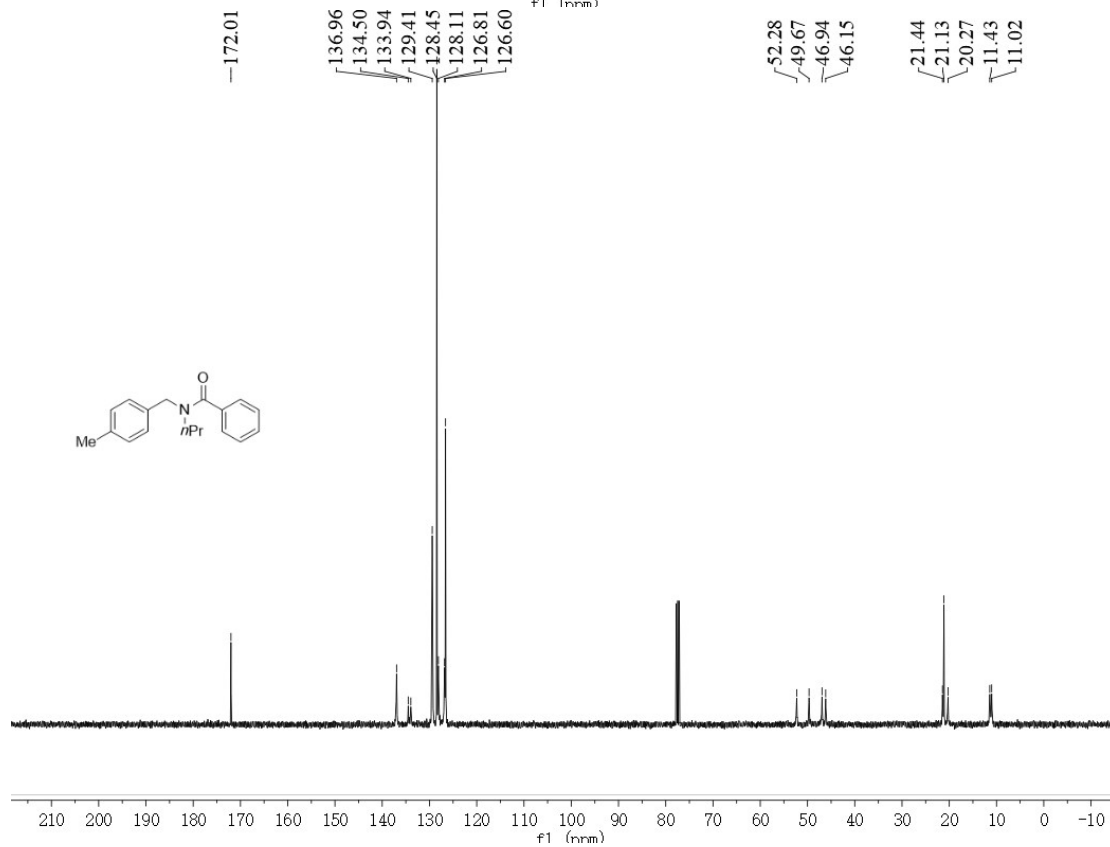

**N-(3-methylbenzyl)-N-propylbenzamide (5ah)**

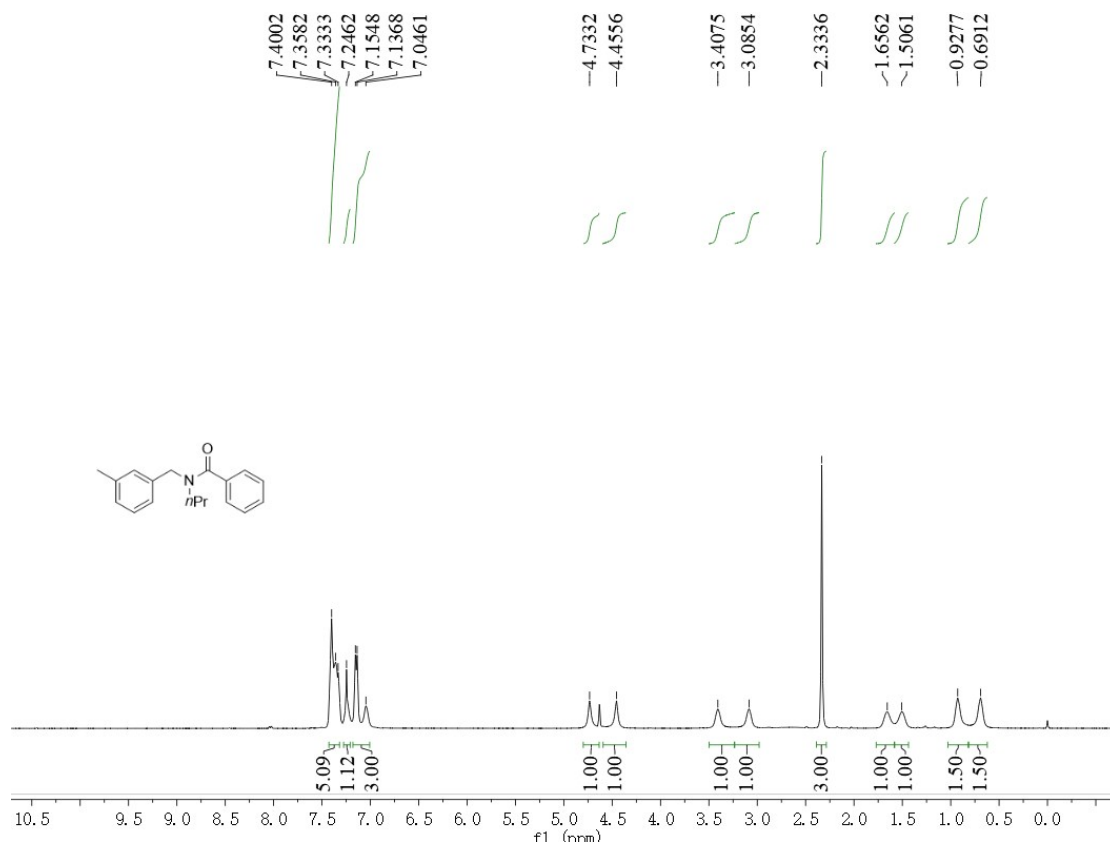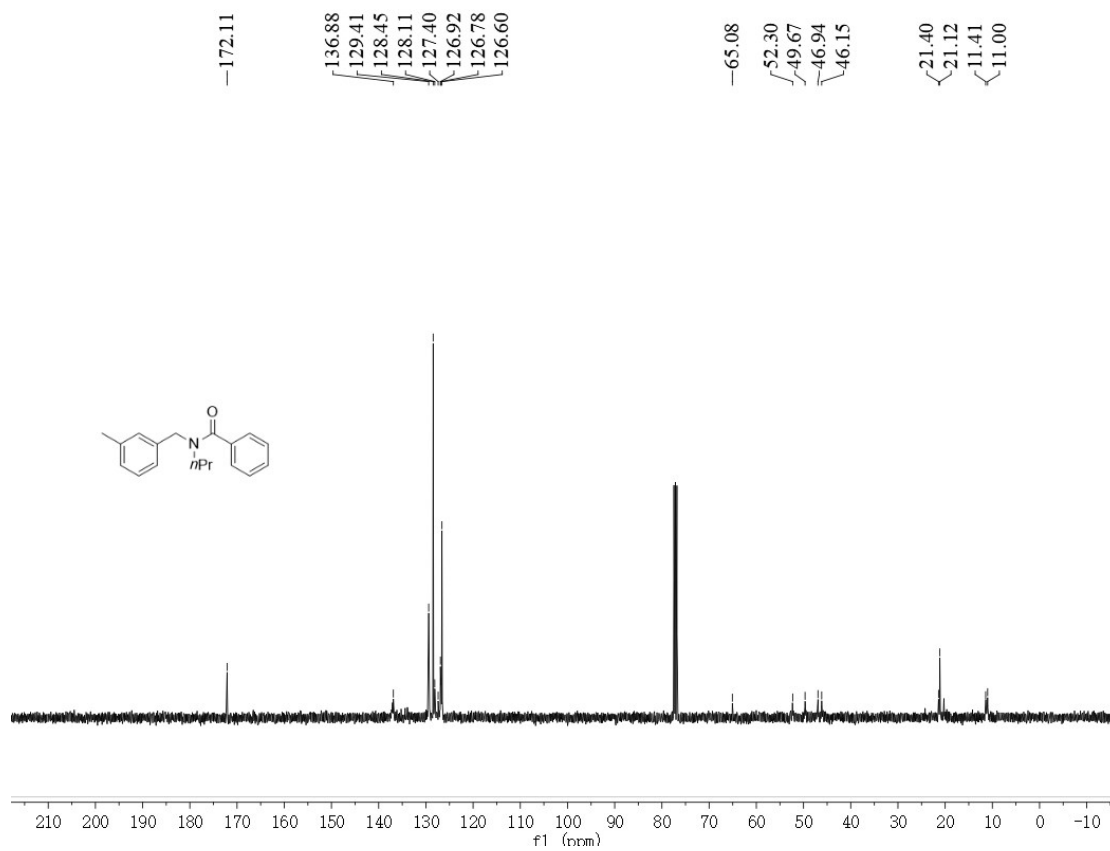

N-(4-methoxybenzyl)-N-propylbenzamide (5ai)

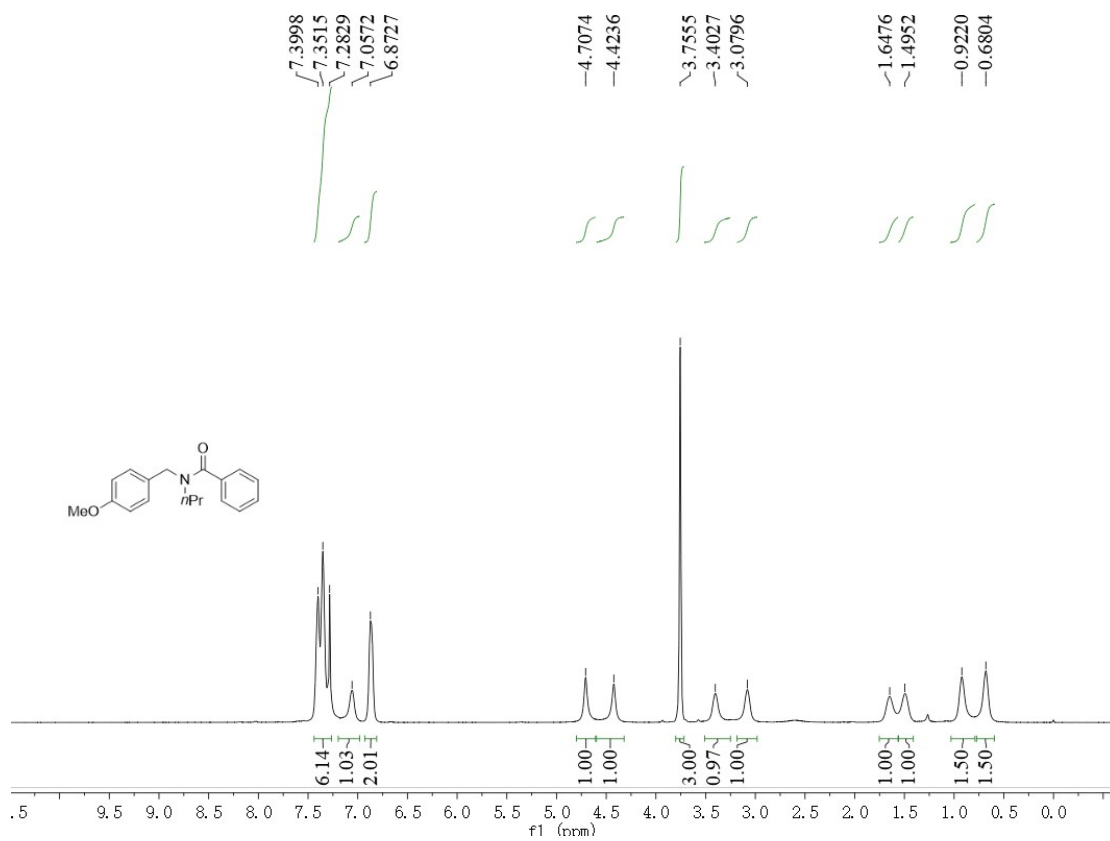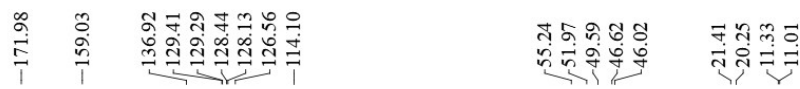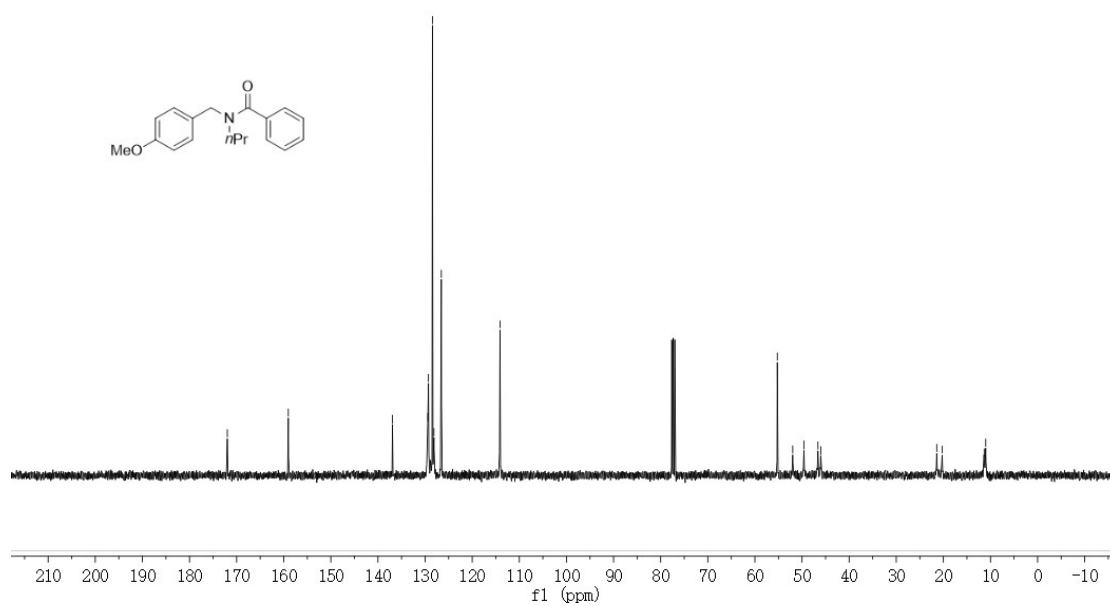

**N-(3-bromo-4-methoxybenzyl)-N-propylbenzamide (5aj)**

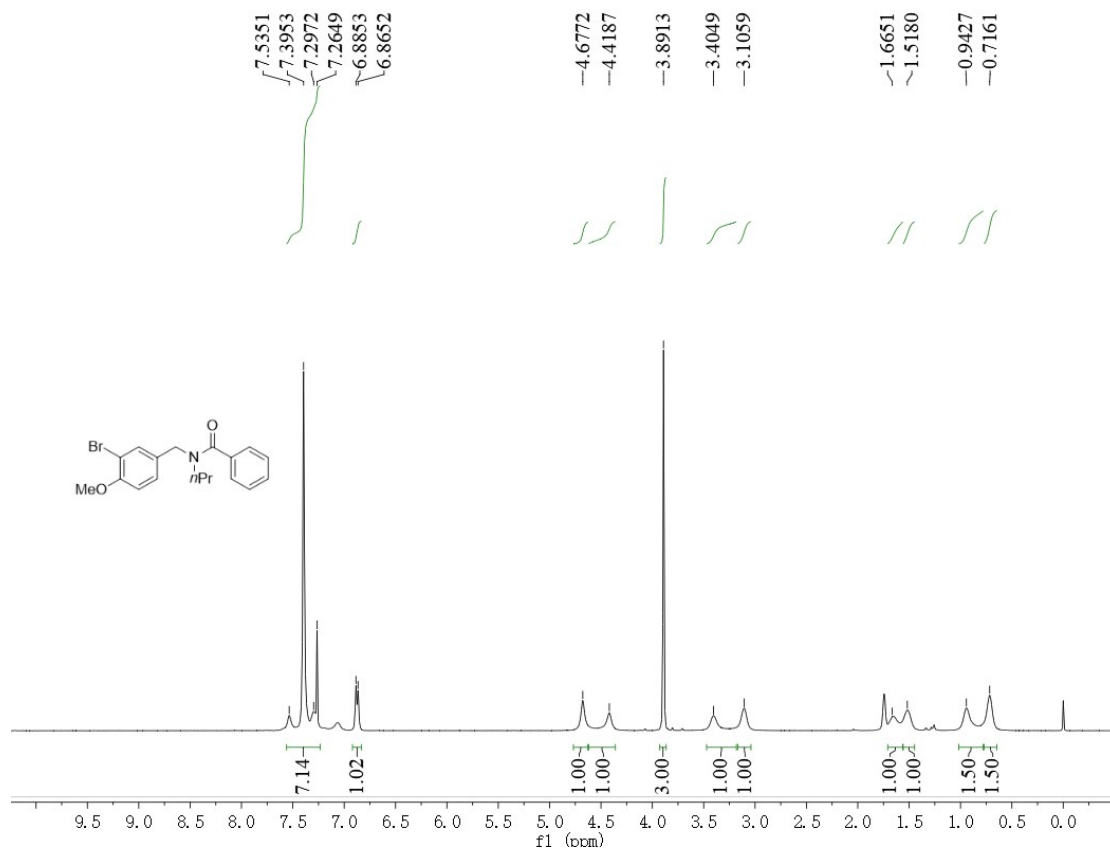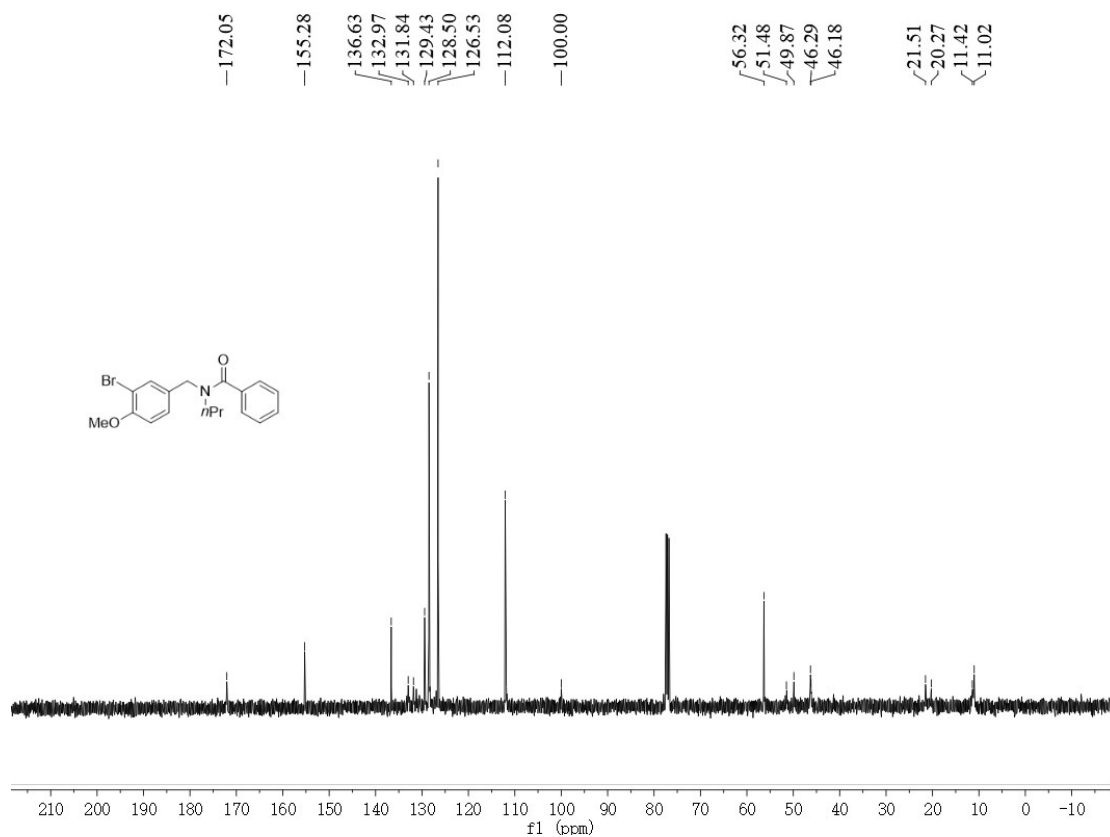

**N-propyl-N-(4-(trifluoromethyl)benzyl)benzamide (5ak)**

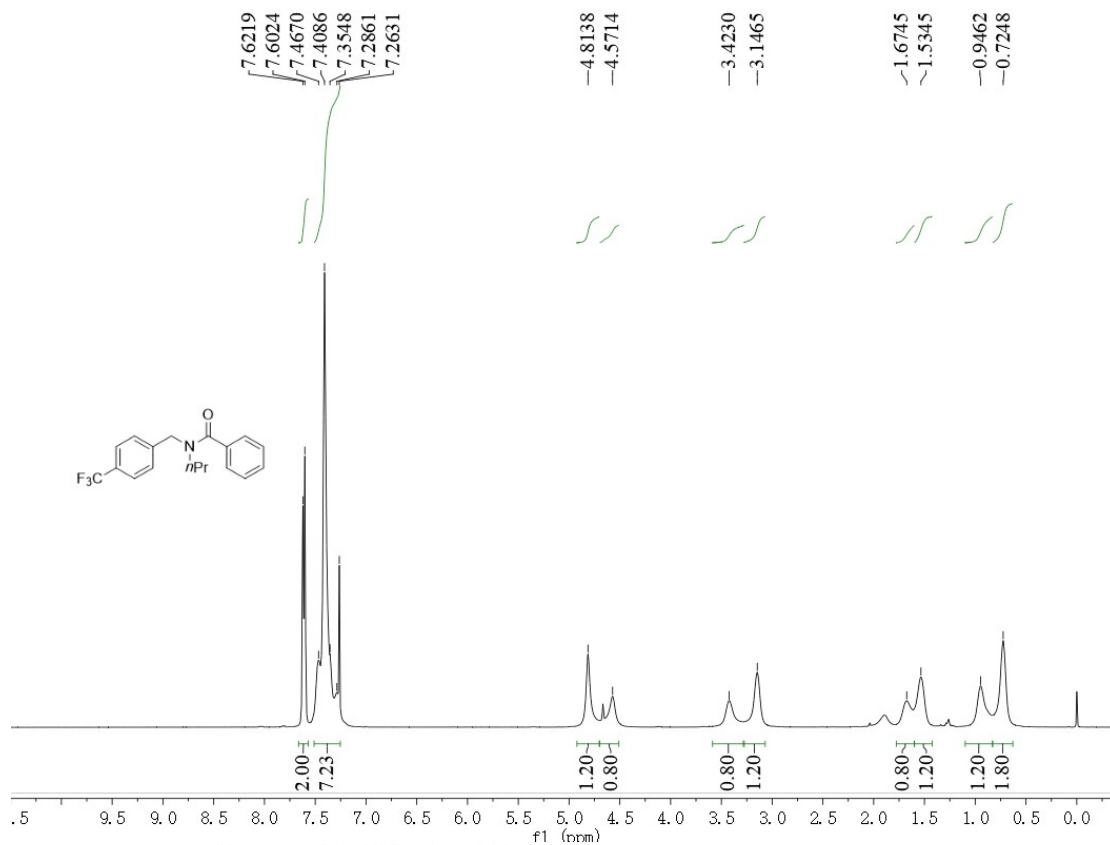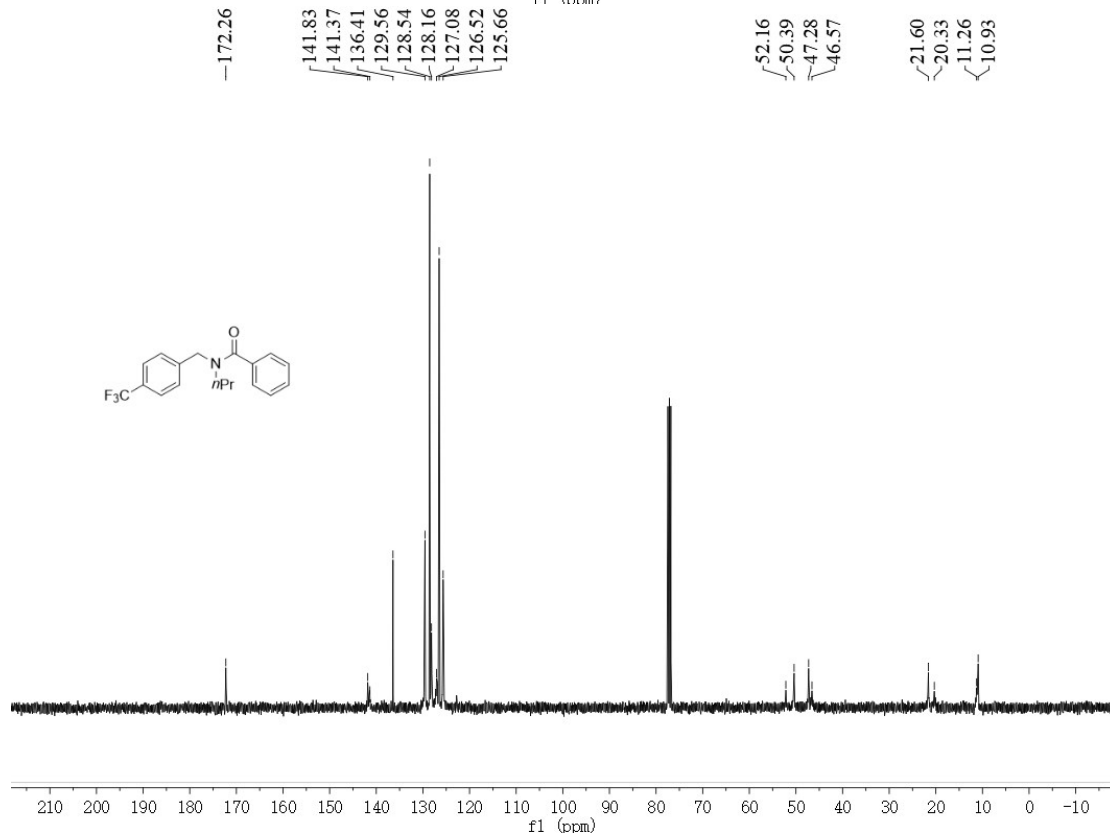

**N-(furan-2-ylmethyl)-N-propylbenzamide (5a)**

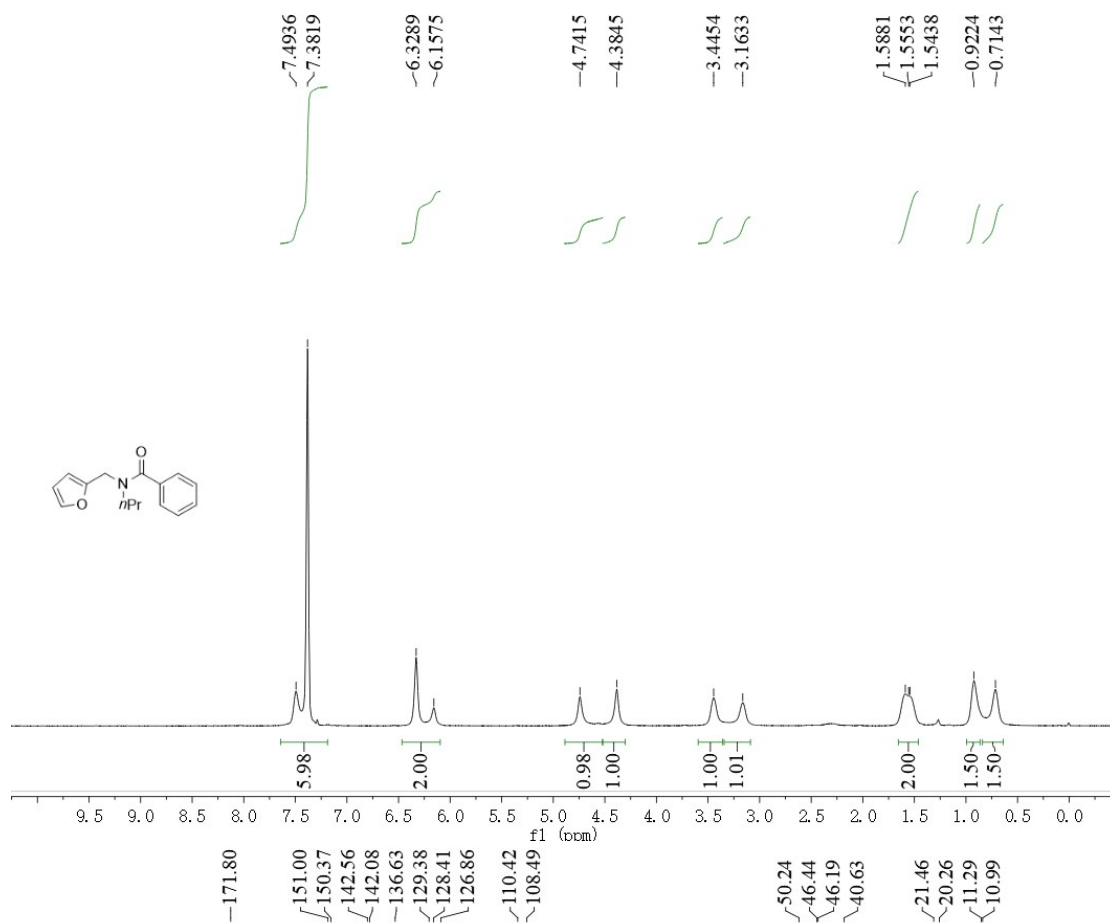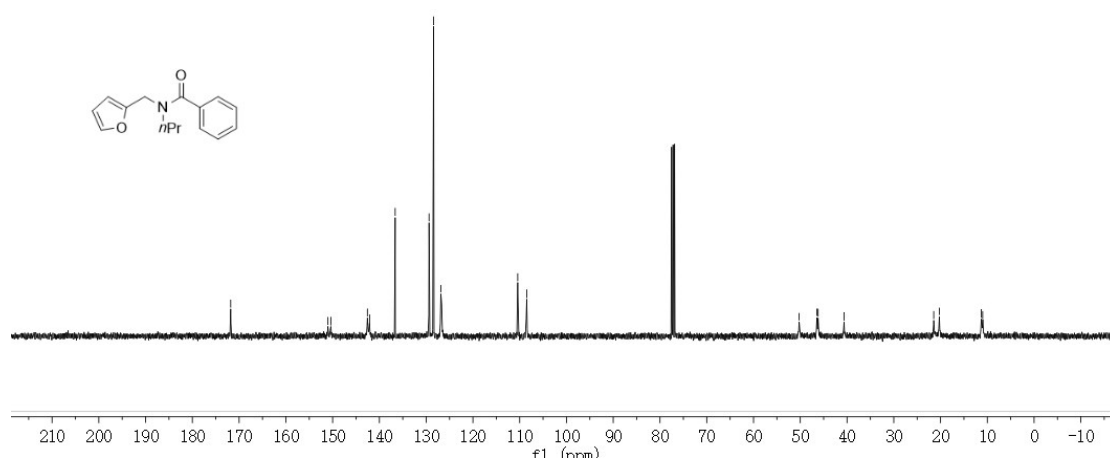

**N-((5-methylfuran-2-yl)methyl)-N-propylbenzamide (5am)**

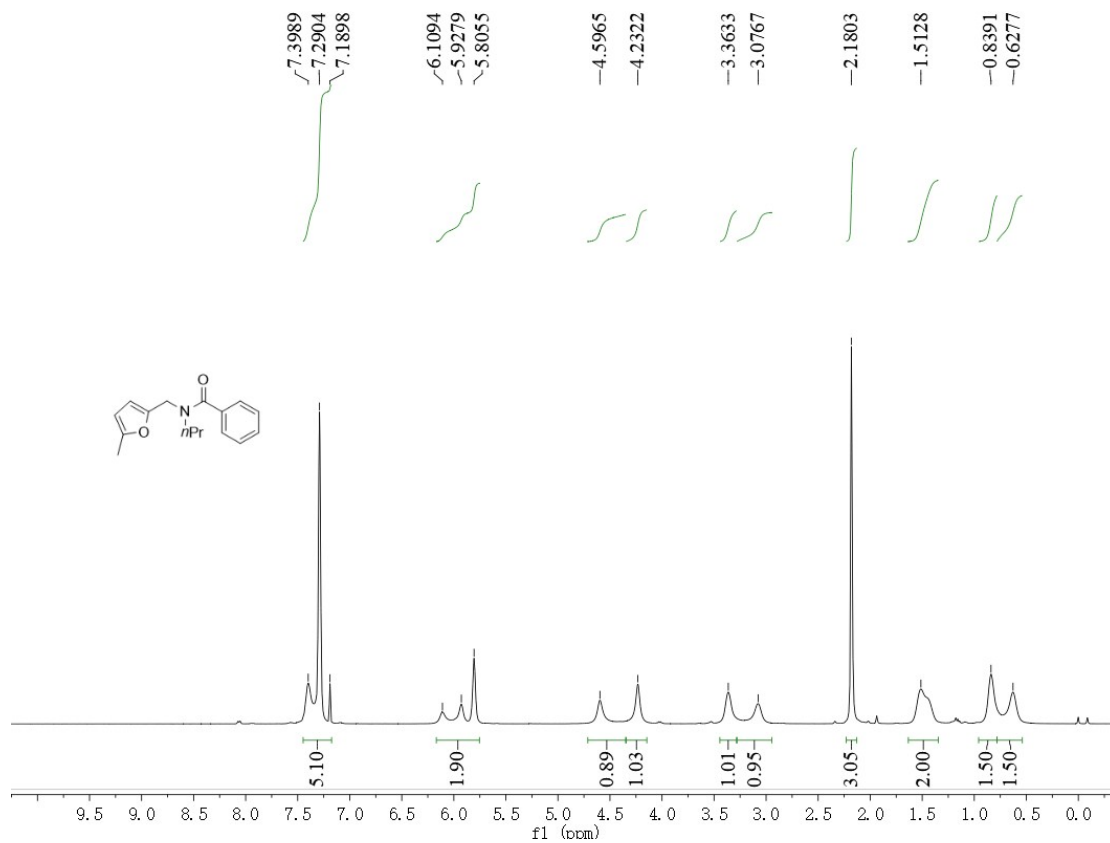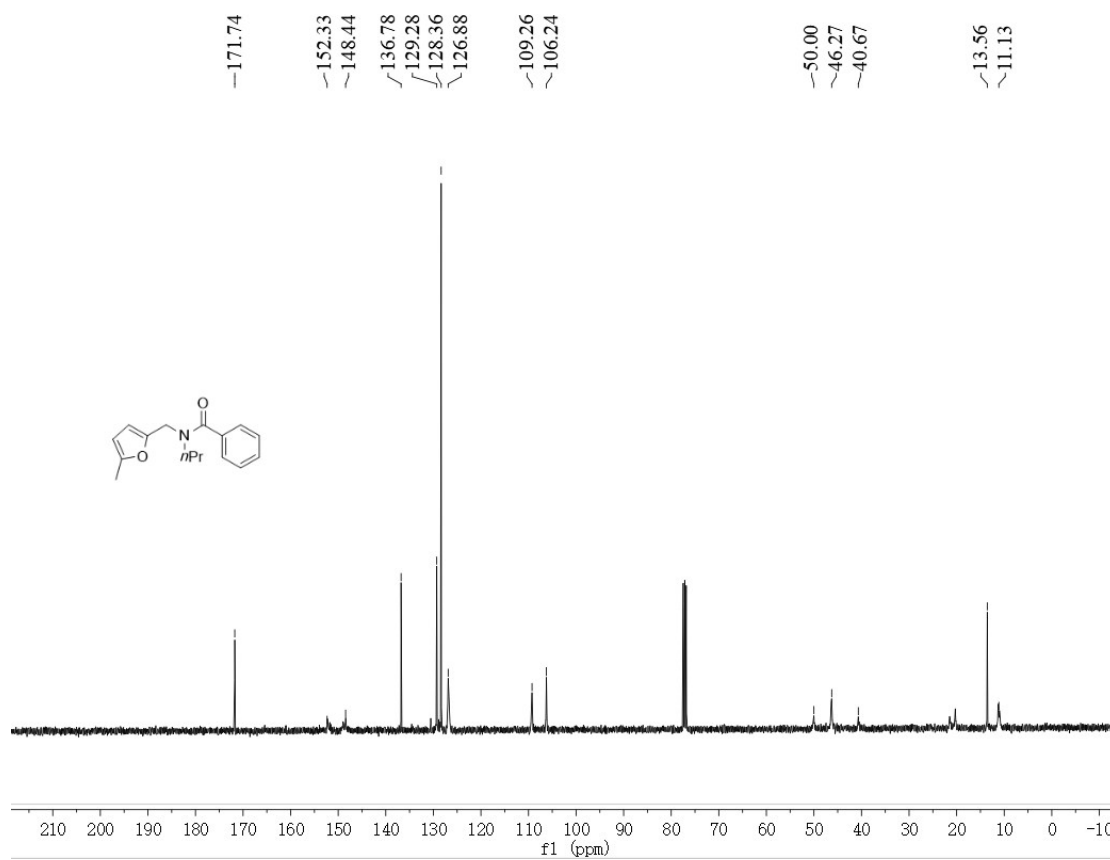

**N-((1H-pyrrol-2-yl)methyl)-N-propylbenzamide (5an)**

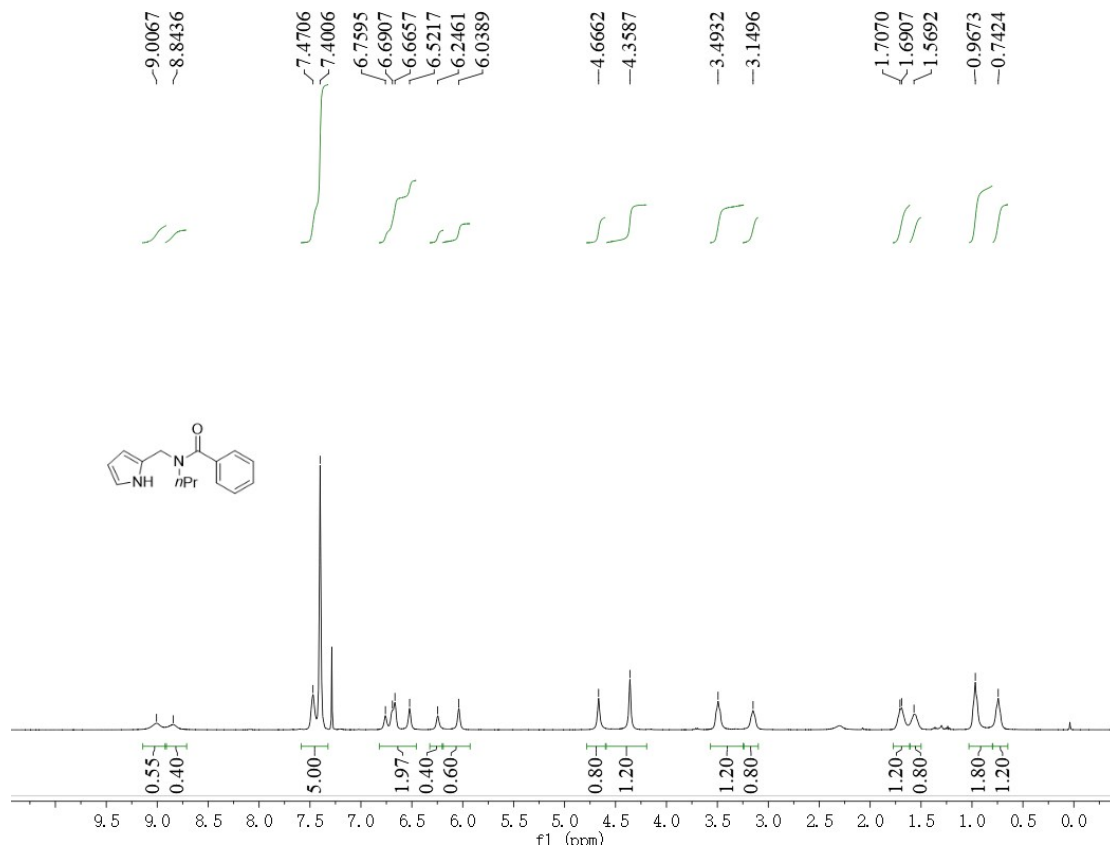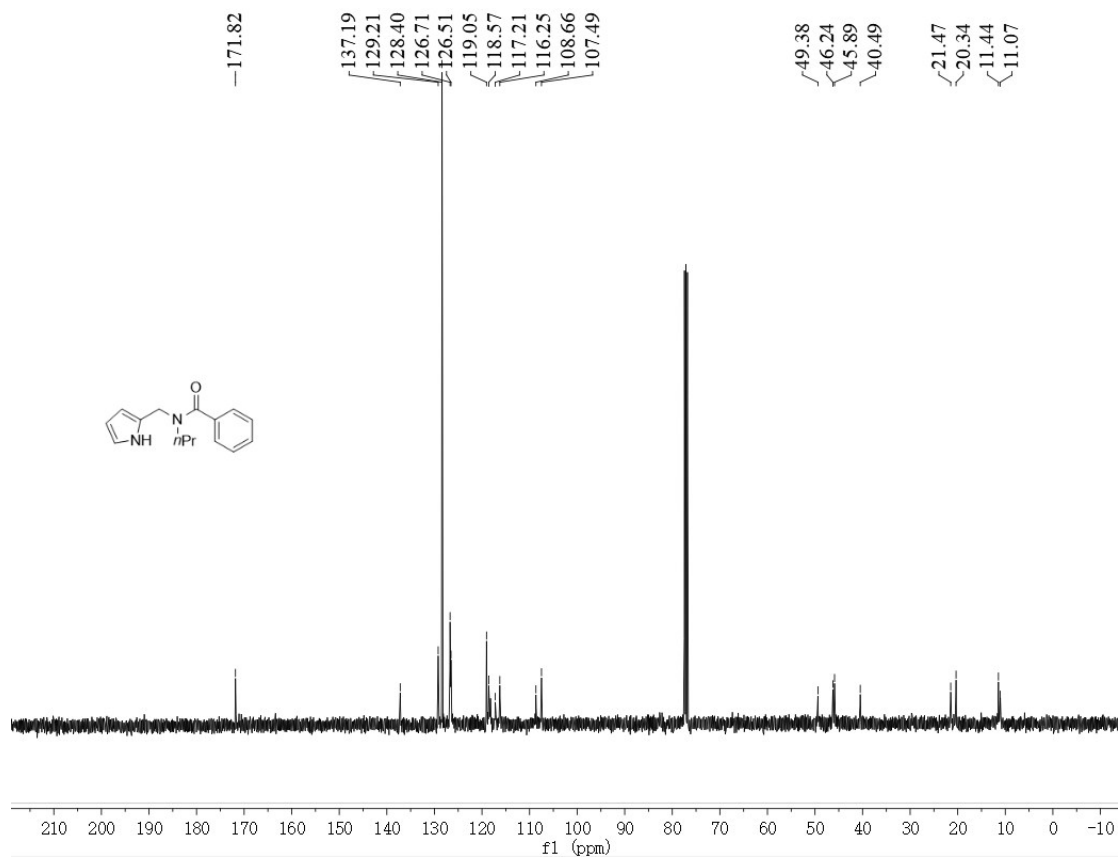

N-propyl-N-(thiophen-2-ylmethyl)benzamide (5ao)



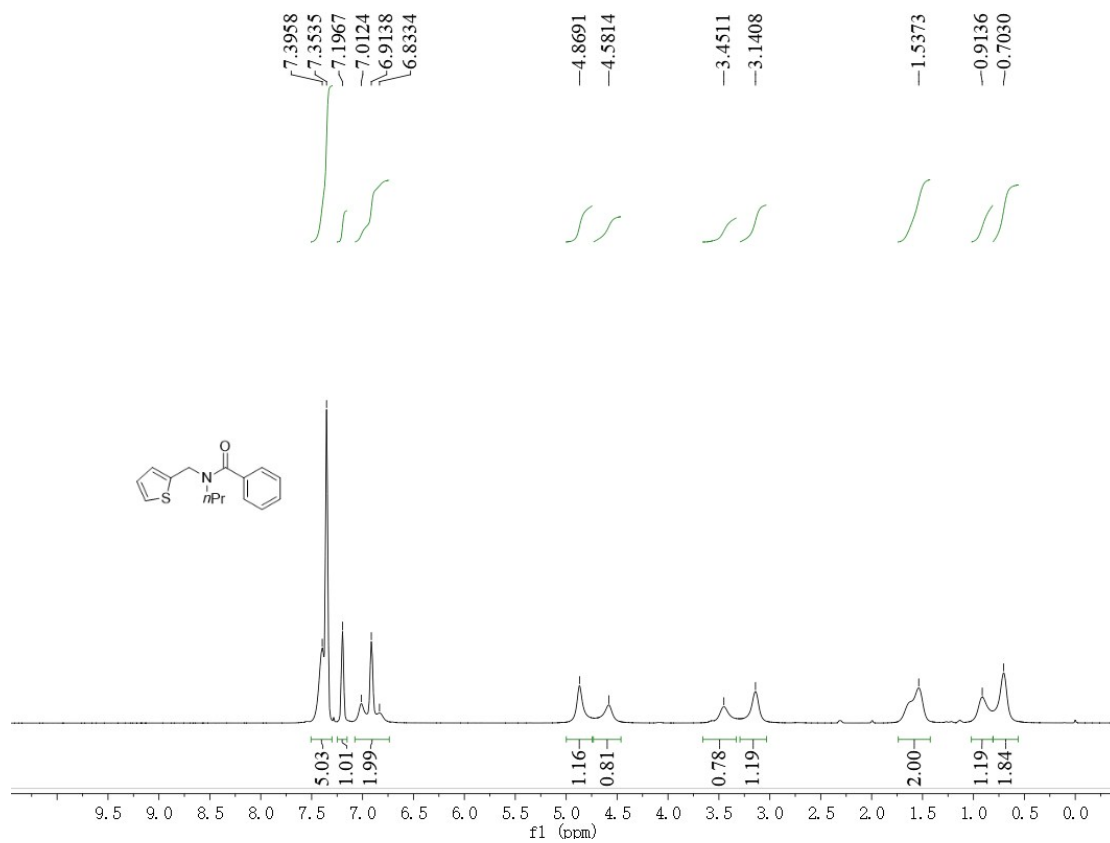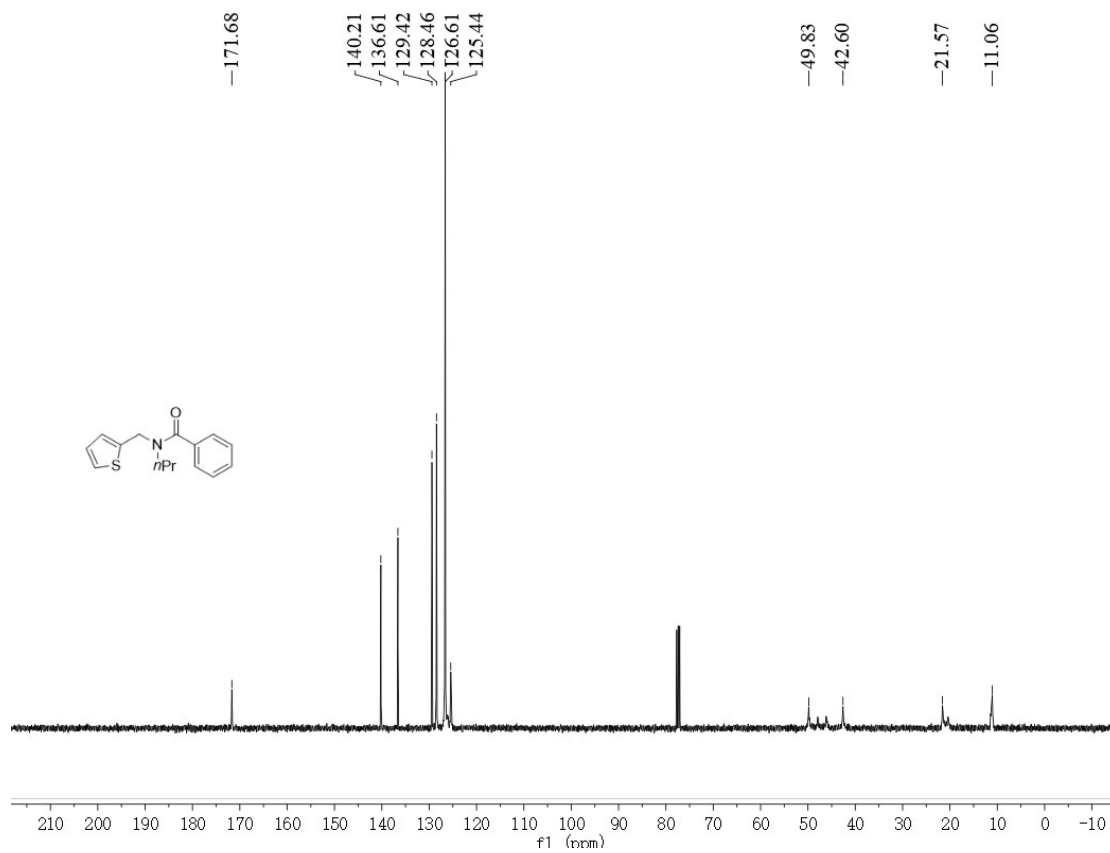

**N-((5-nitrofuran-2-yl)methyl)-N-propylbenzamide (5ap)**

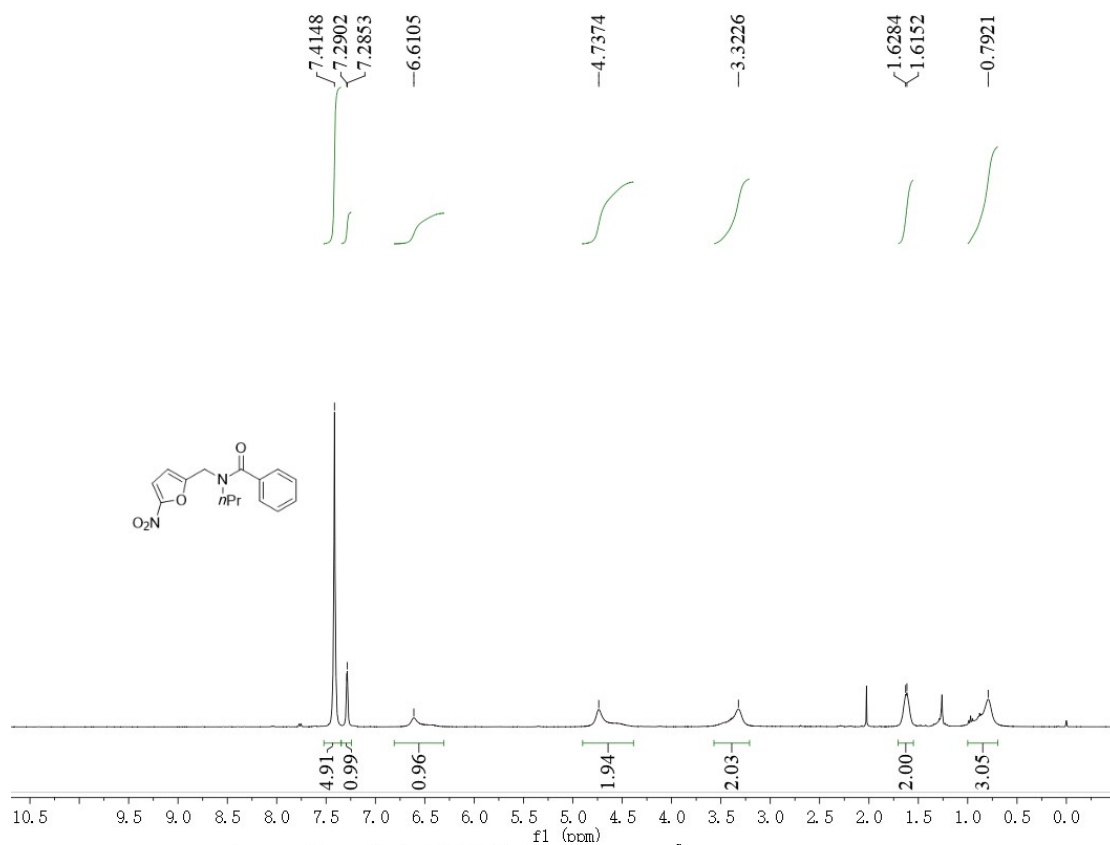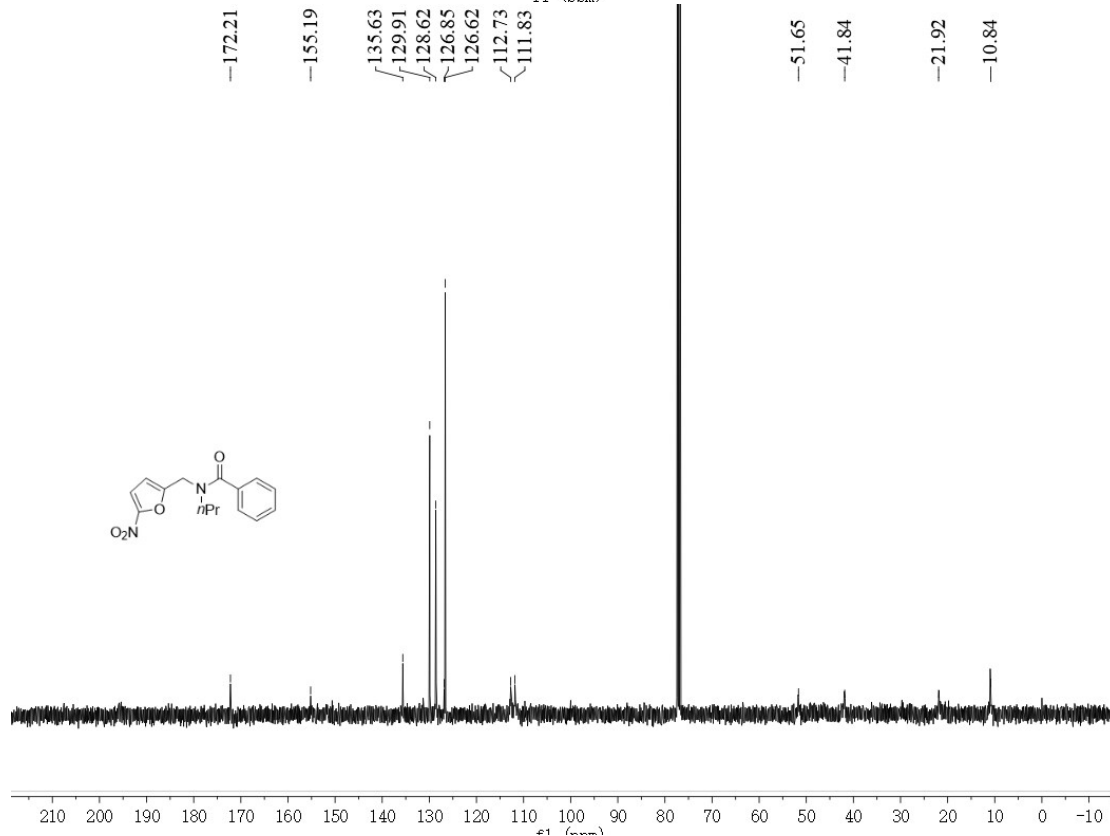

**N-((1,2-dimethyl-1H-indol-3-yl)methyl)-4-methyl-N-propylbenzenesulfonamide (7a)**

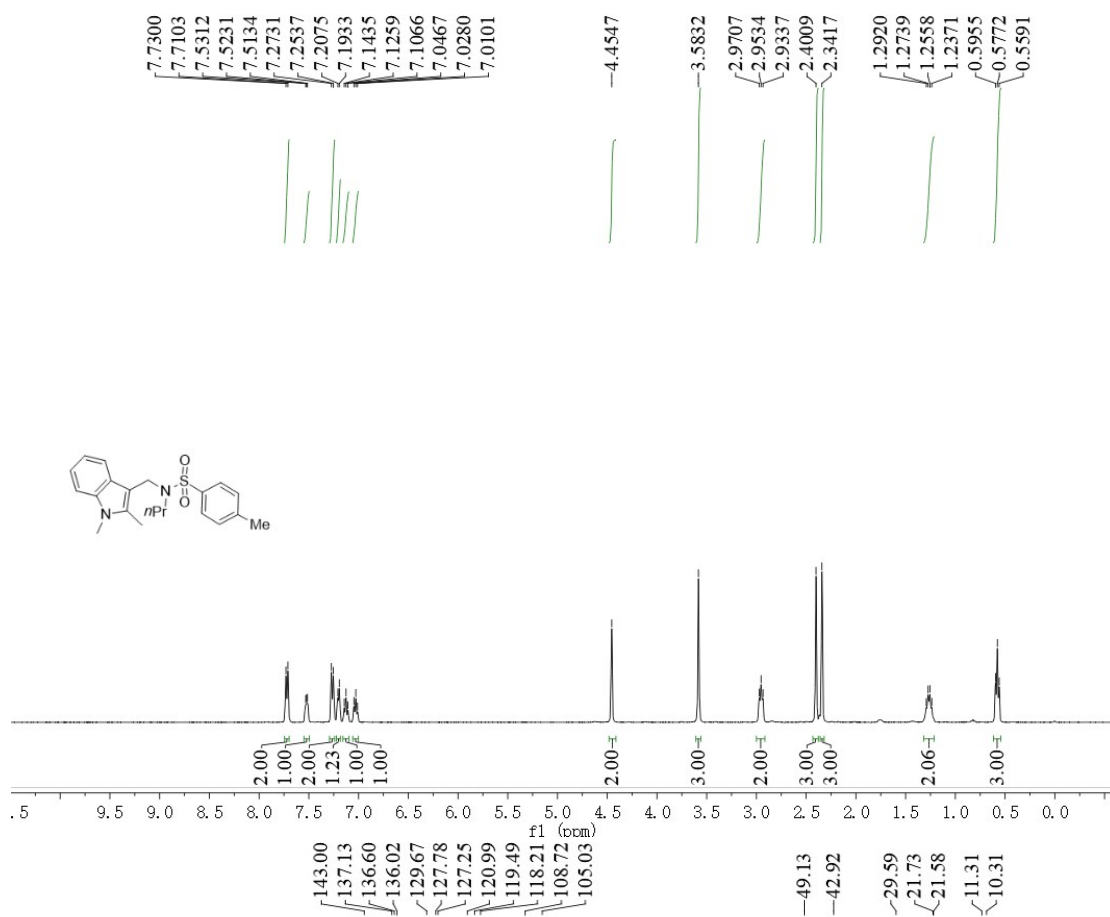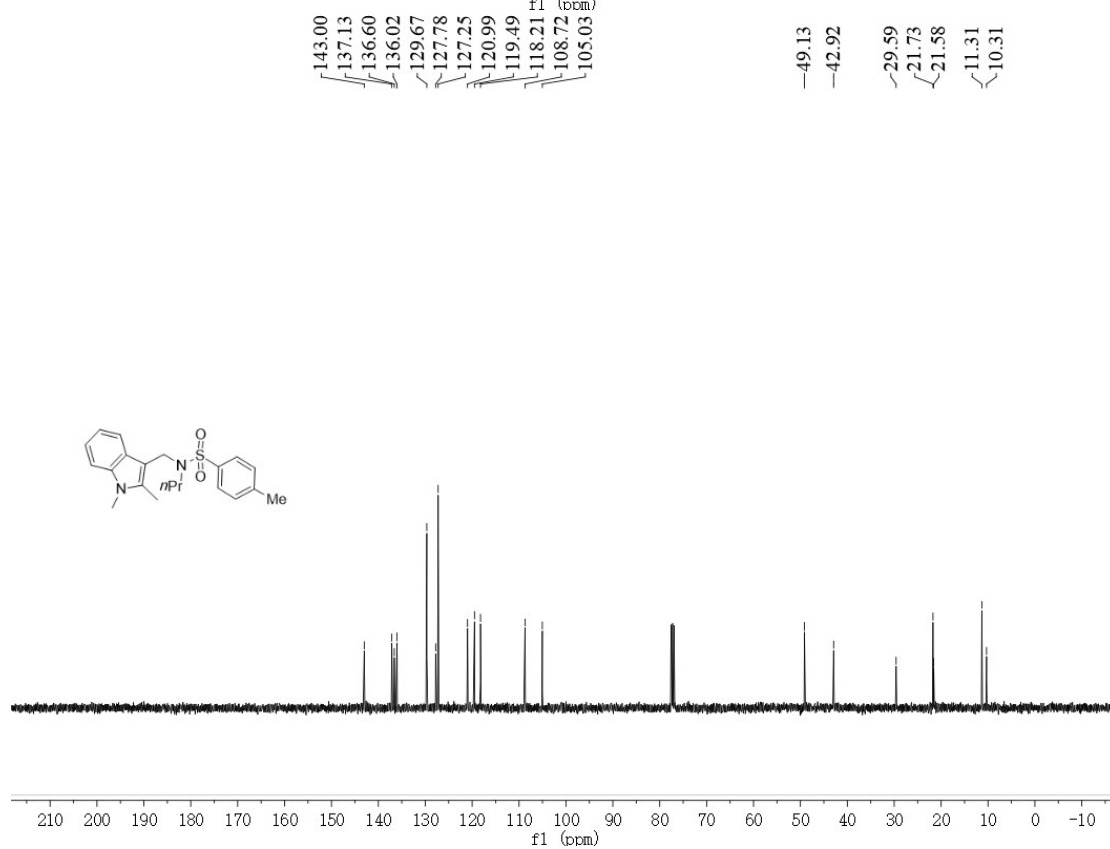

**N-(4-methoxybenzyl)-4-methylbenzenesulfonamide (7b)**

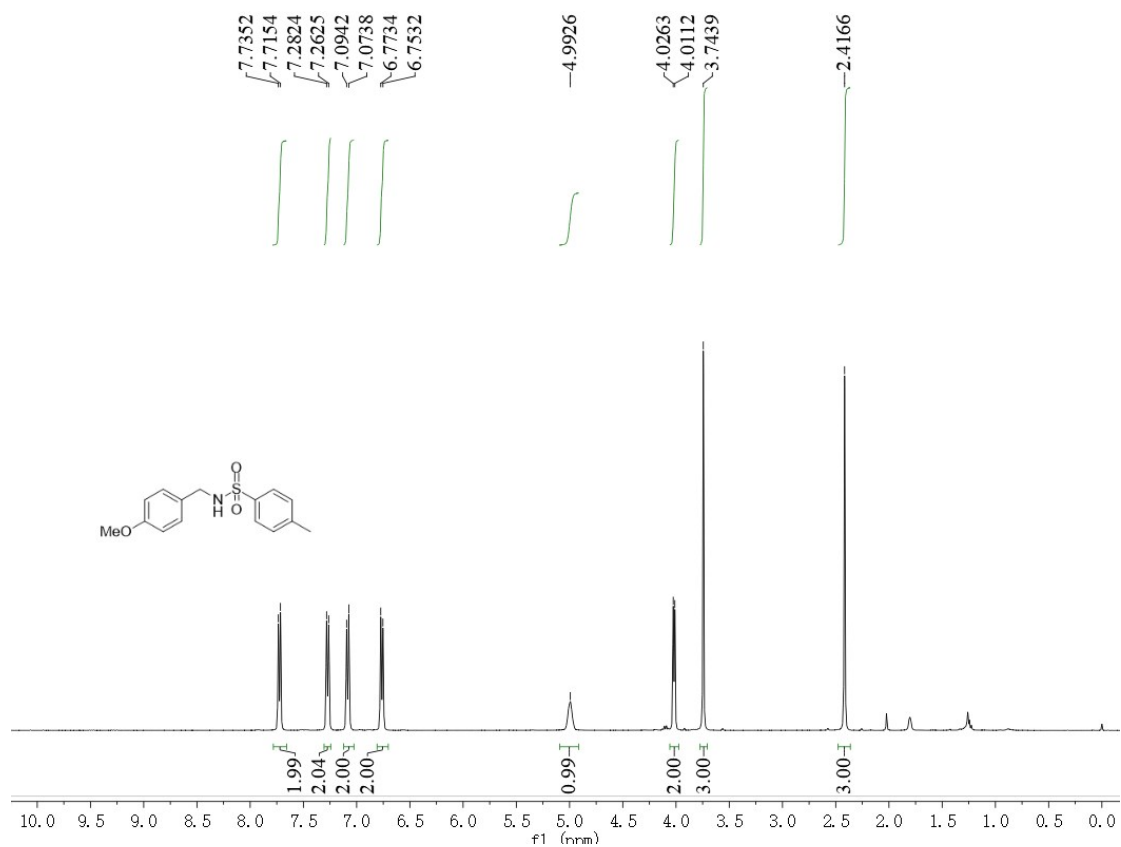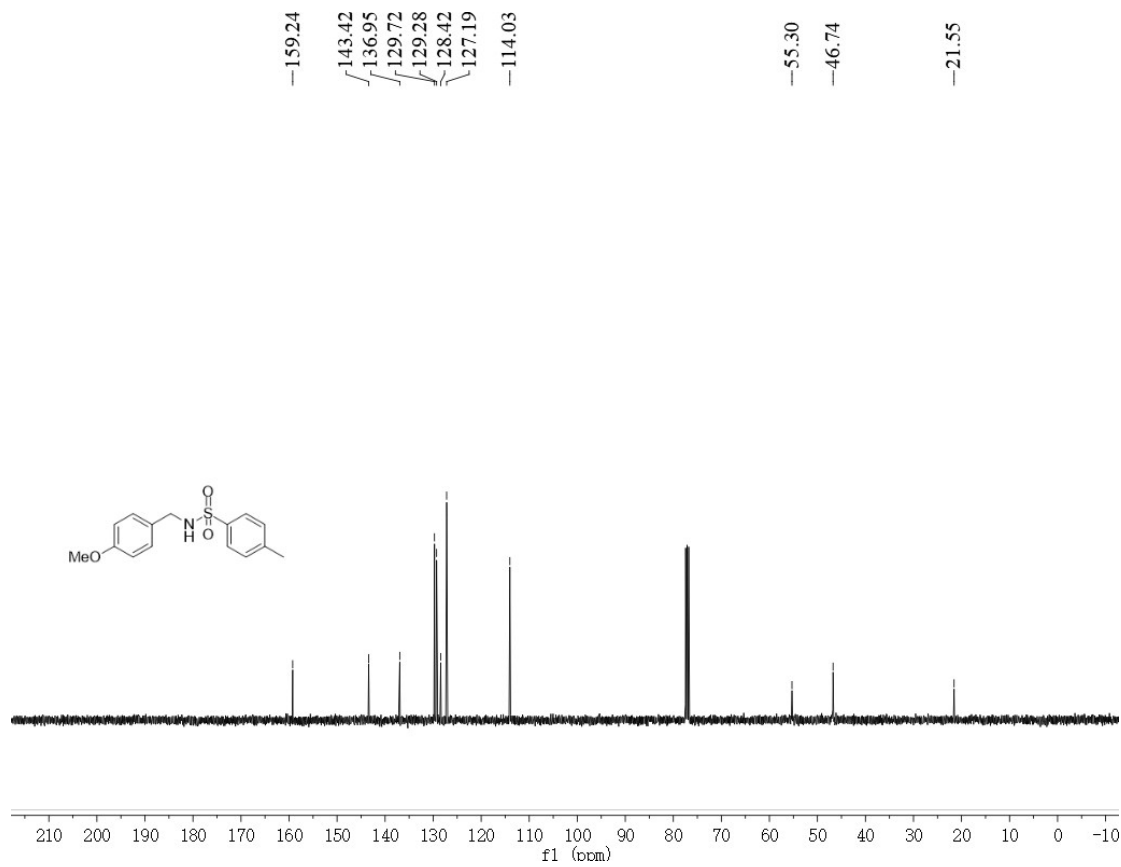

**N-propylbenzamide (6a)**

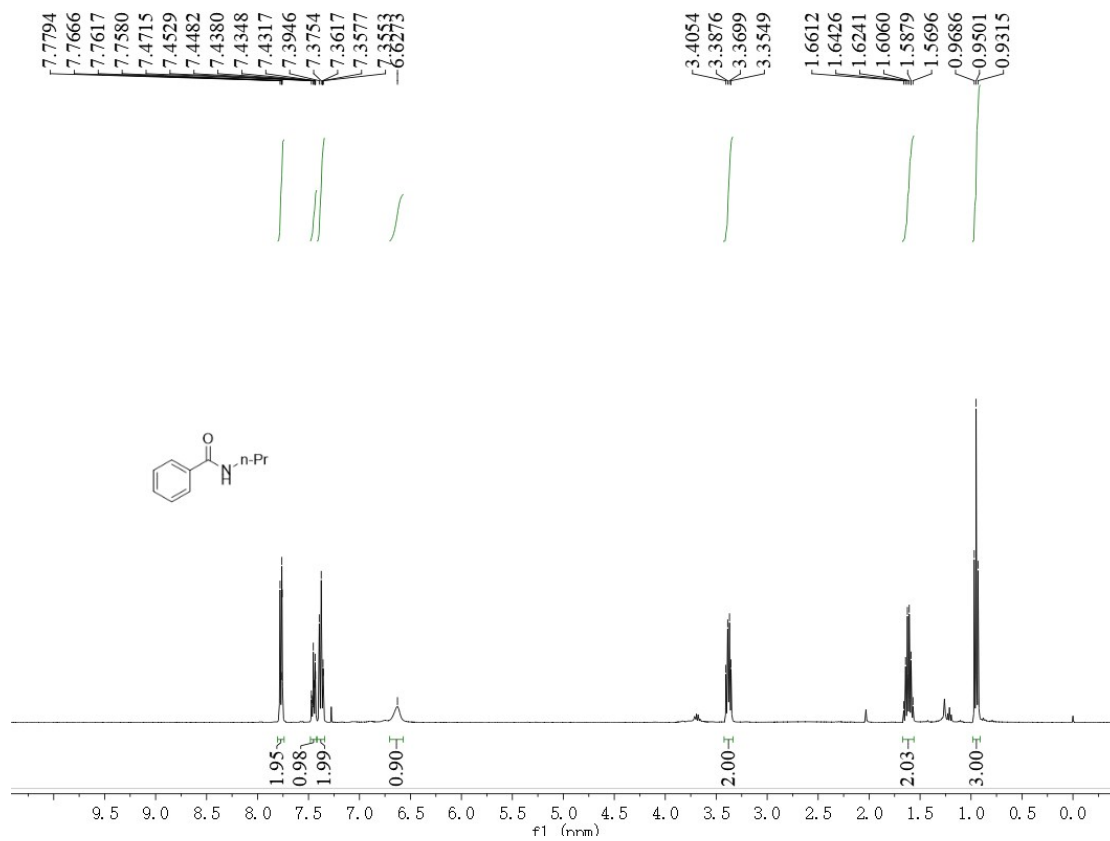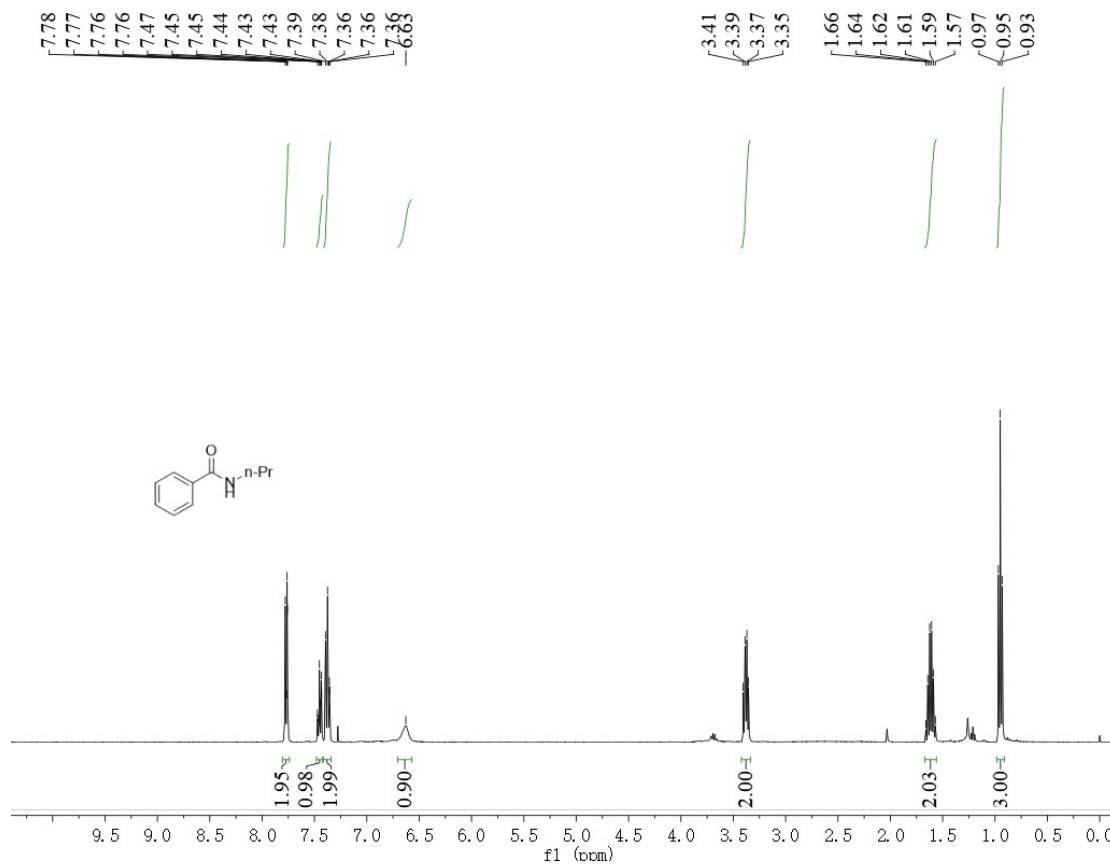

4-Cyano-N-propylbenzamide (6b)

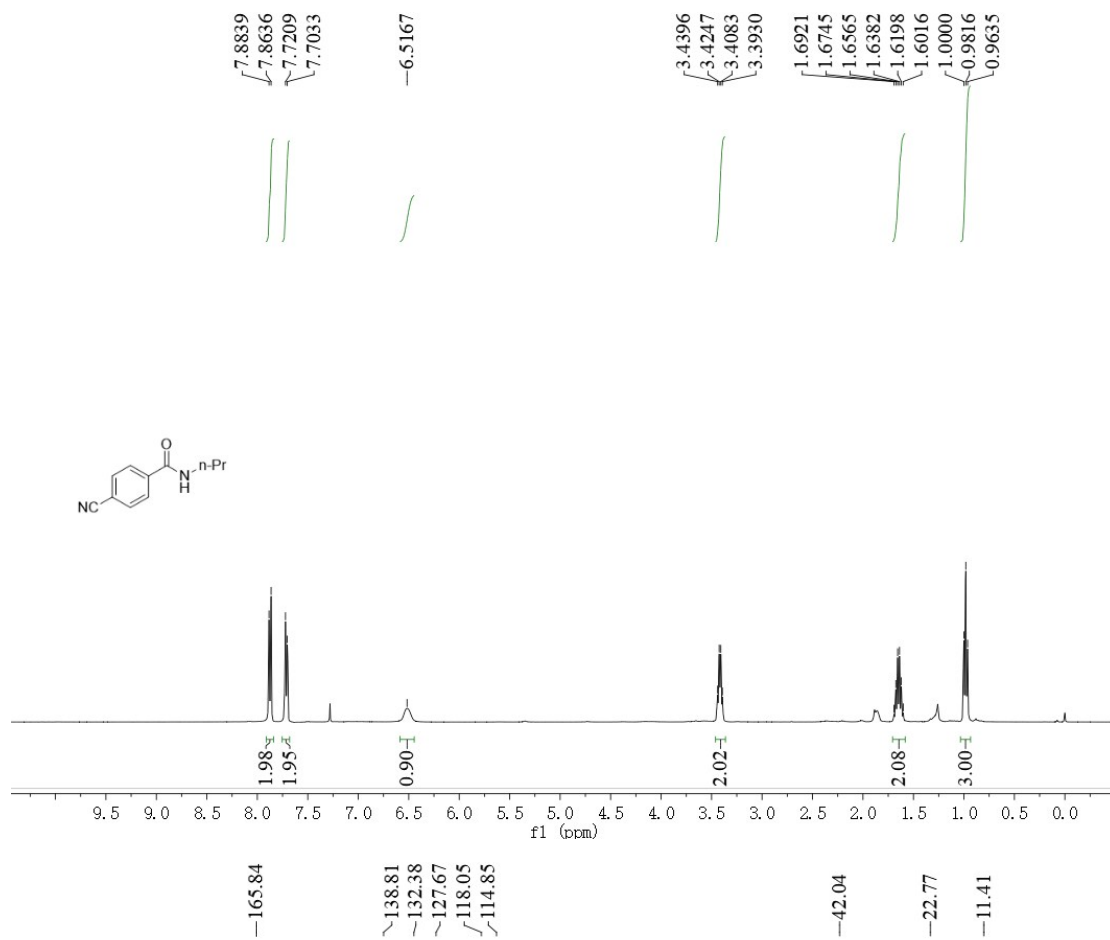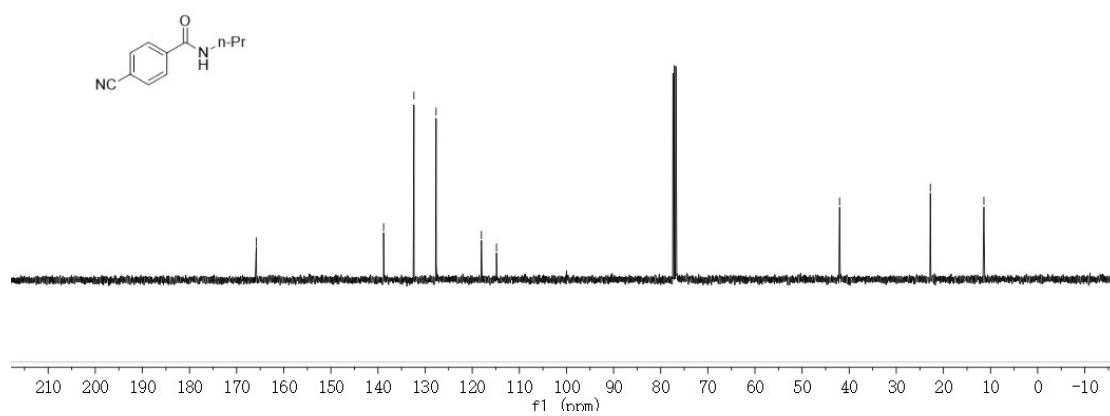

4-Methyl-N-propylbenzamide (6c)

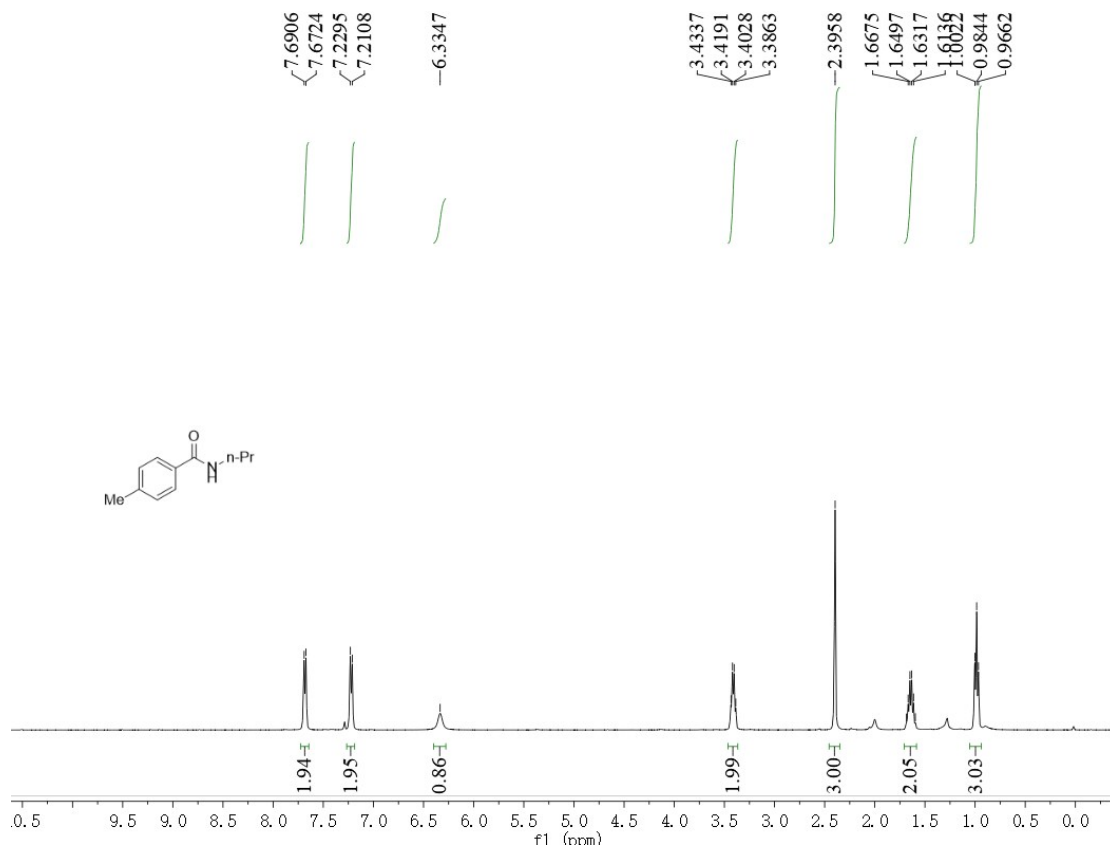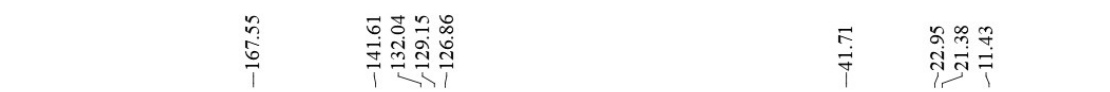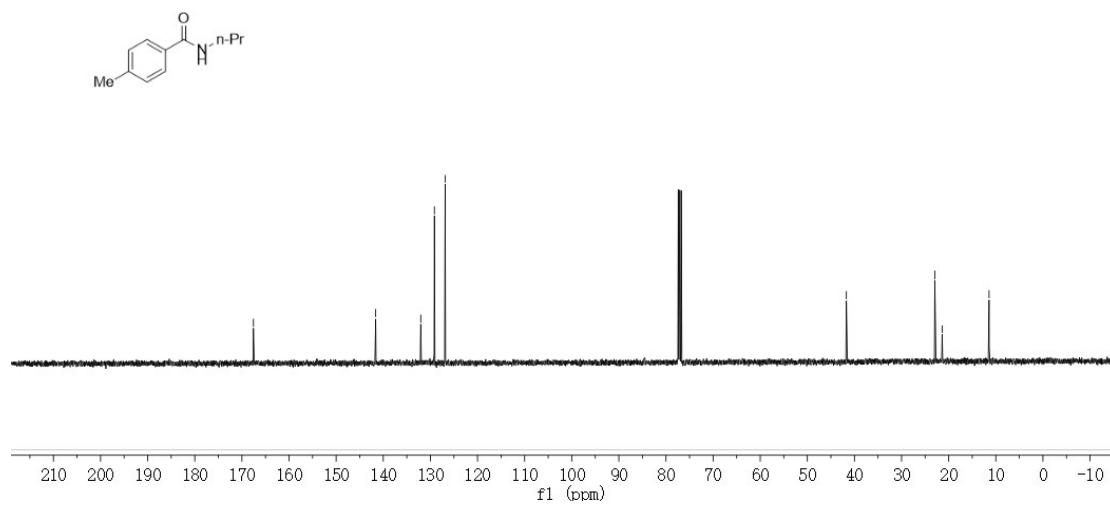

4-Methoxy-N-propylbenzamide (6d)

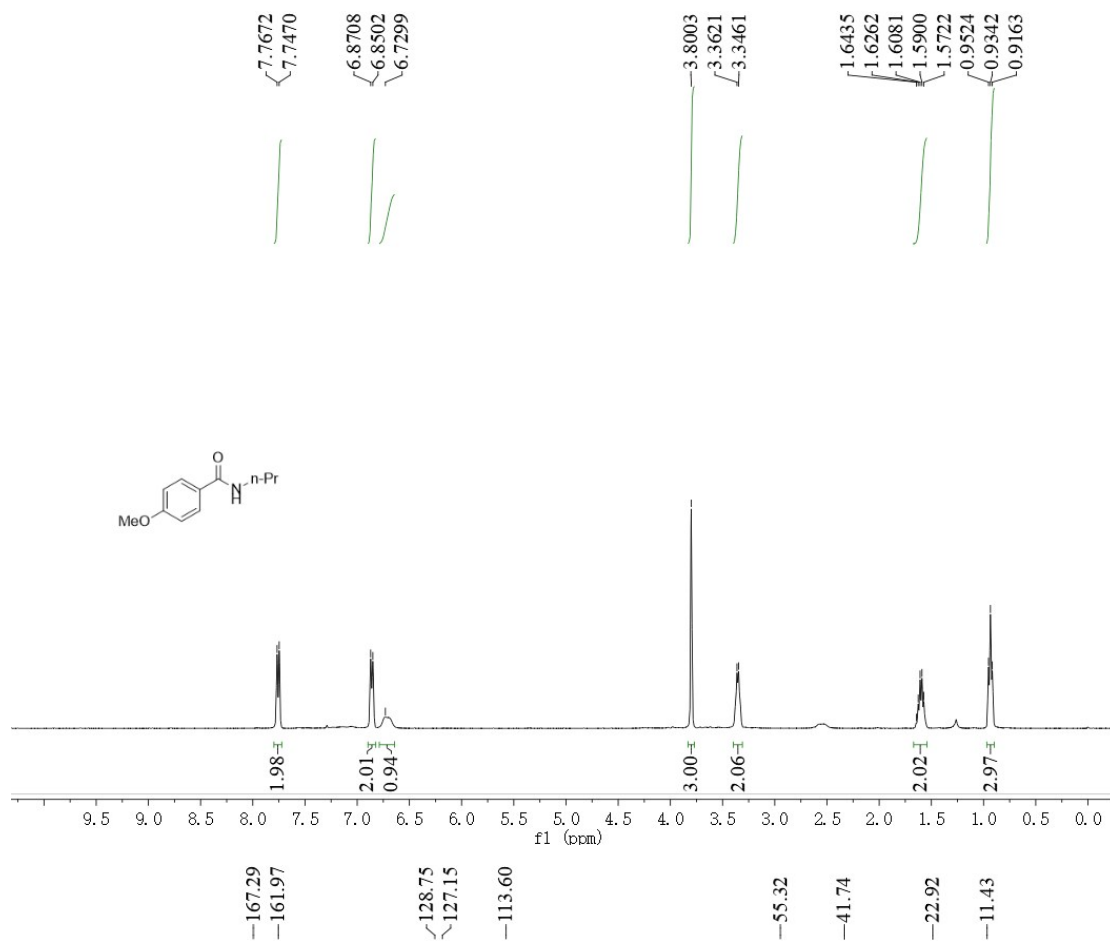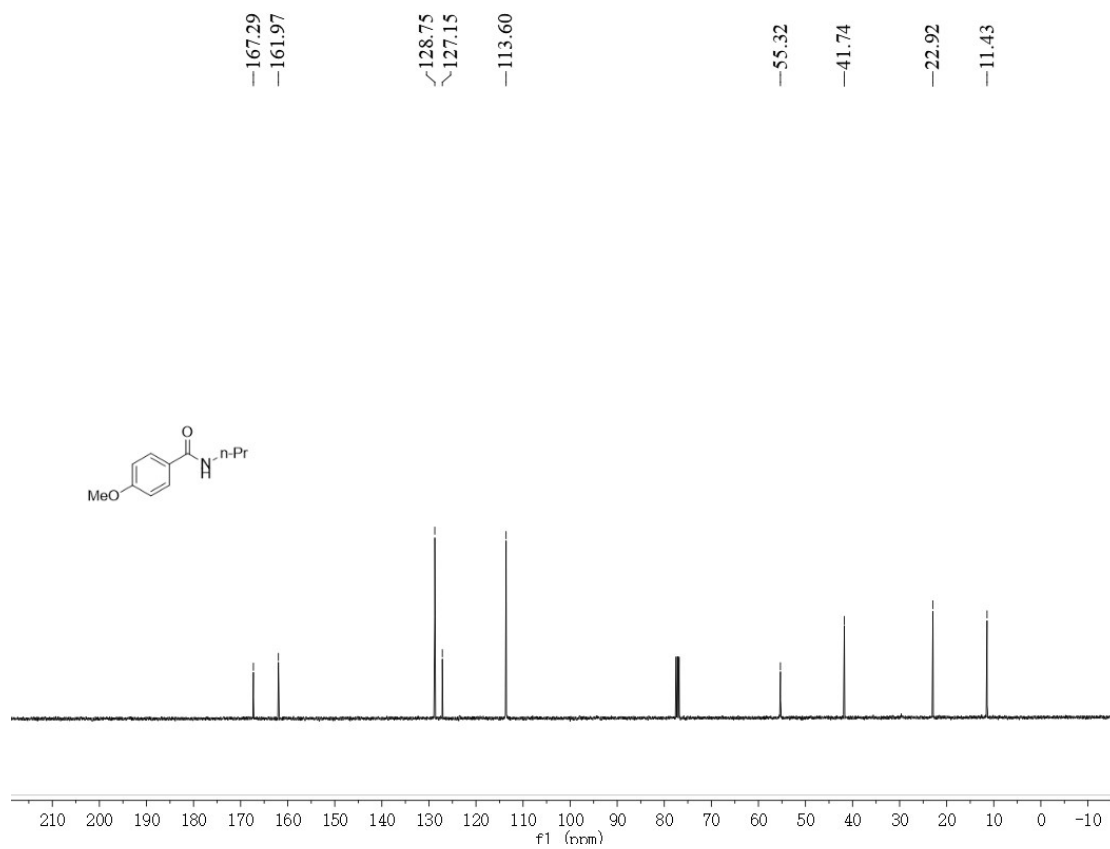

4-Hydroxy-N-propylbenzamide (6e)



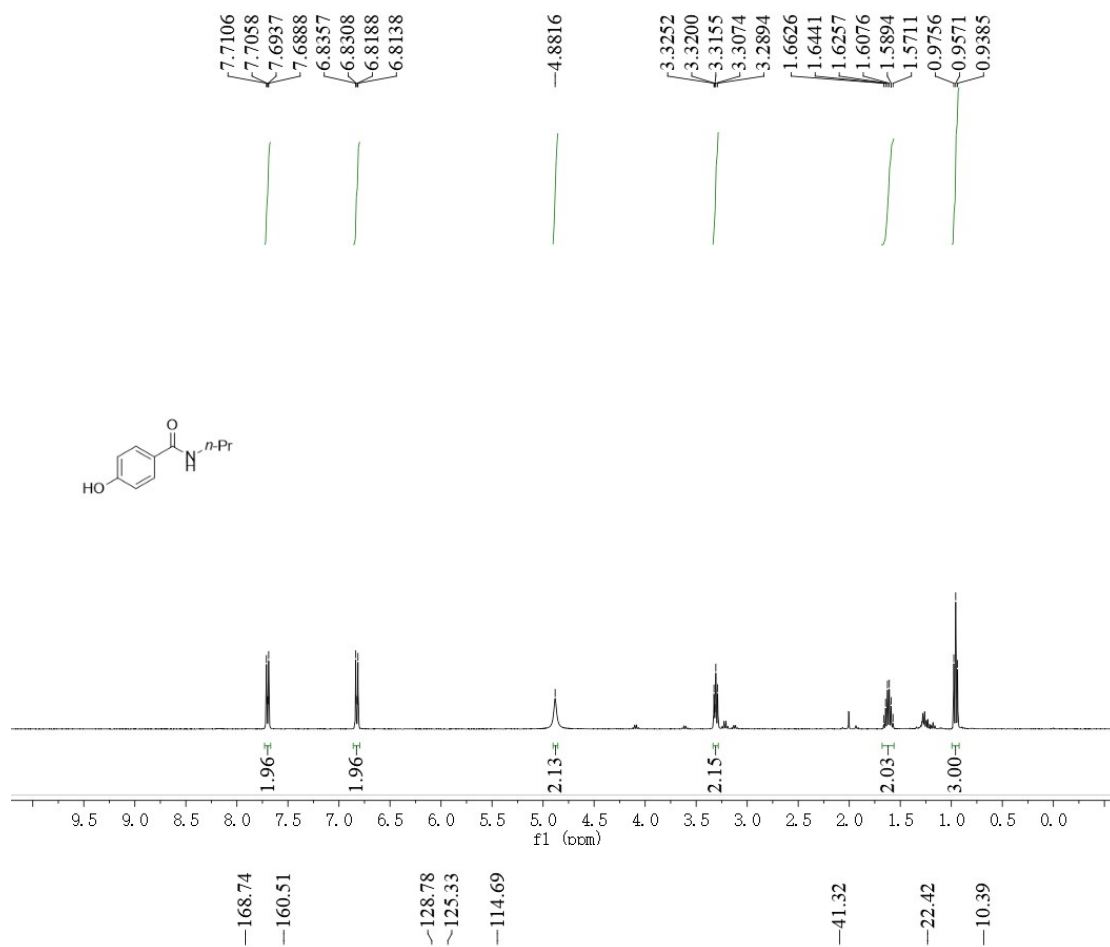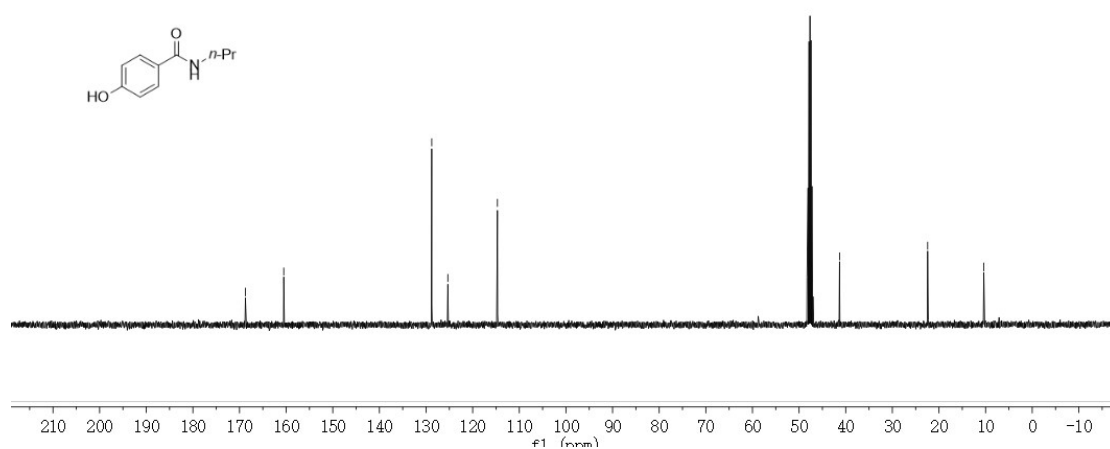

**N-propylfuran-2-carboxamide (6f)**

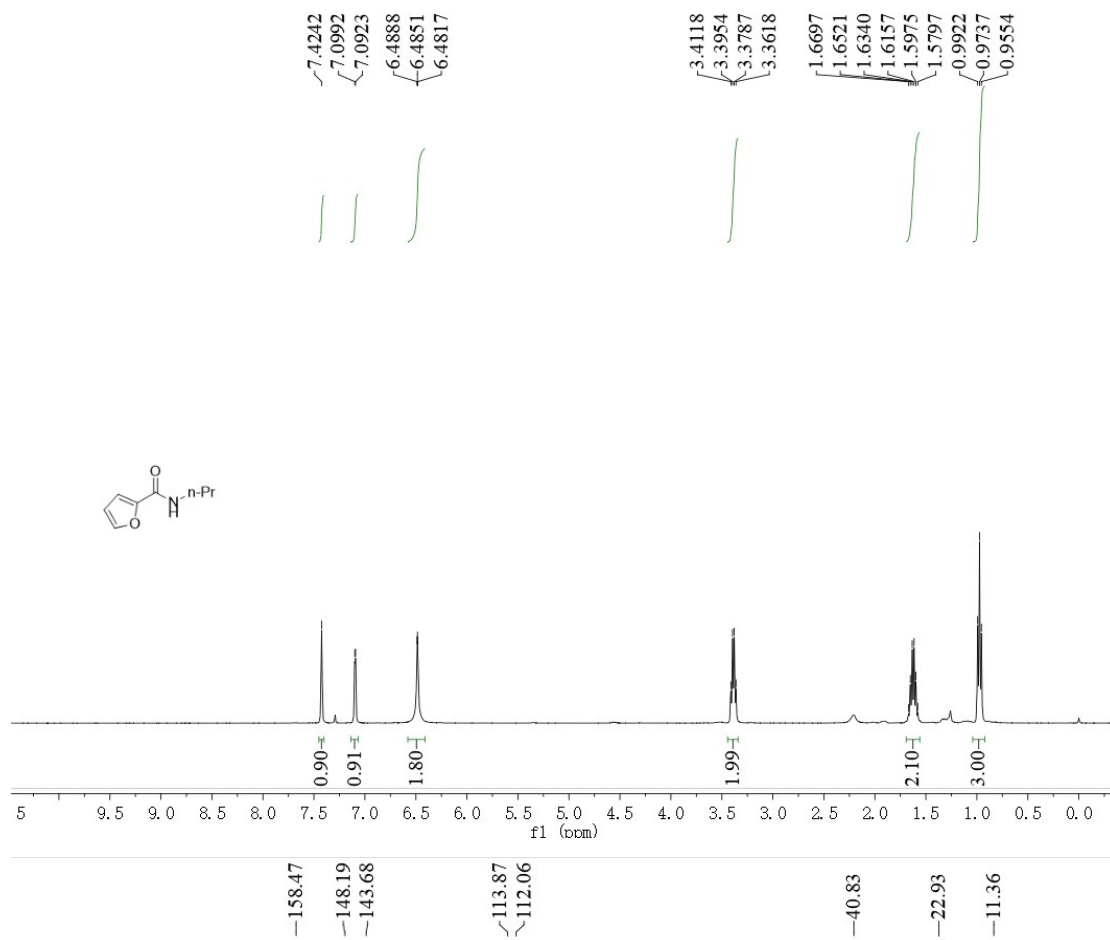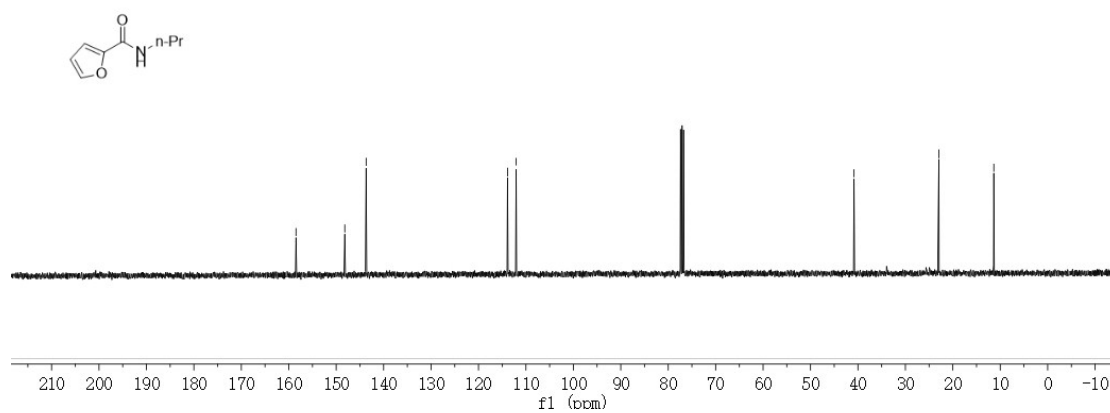

**N-propylthiophene-2-carboxamide (6g)**

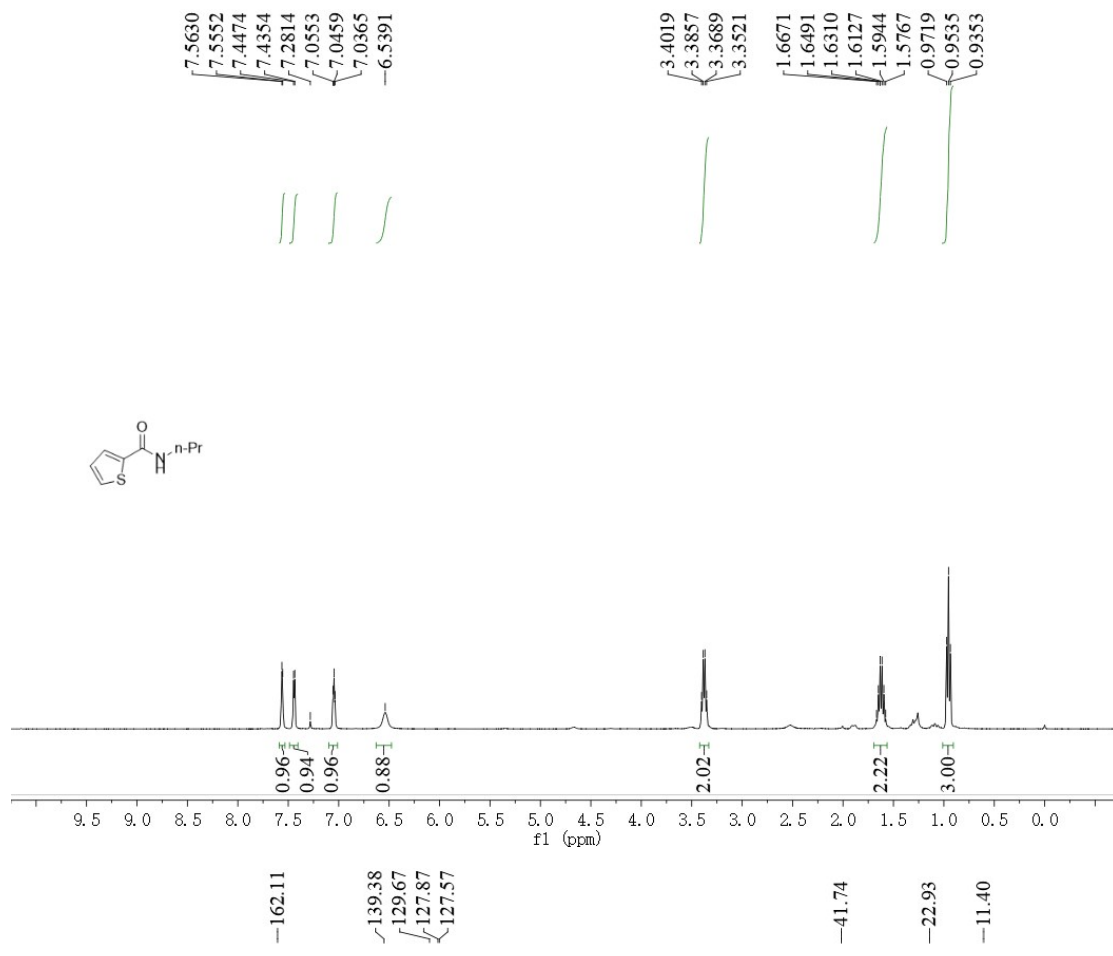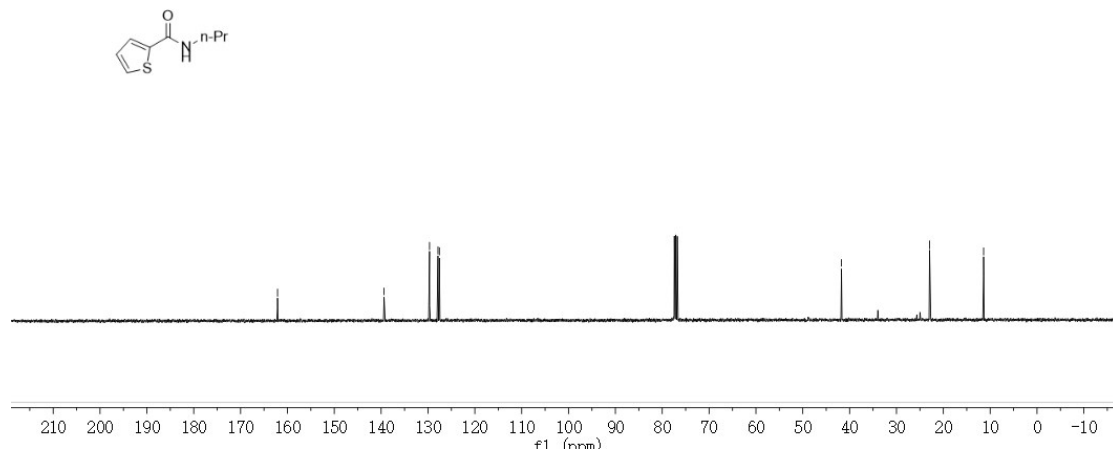

**N-propylcinnamamide (6h)**

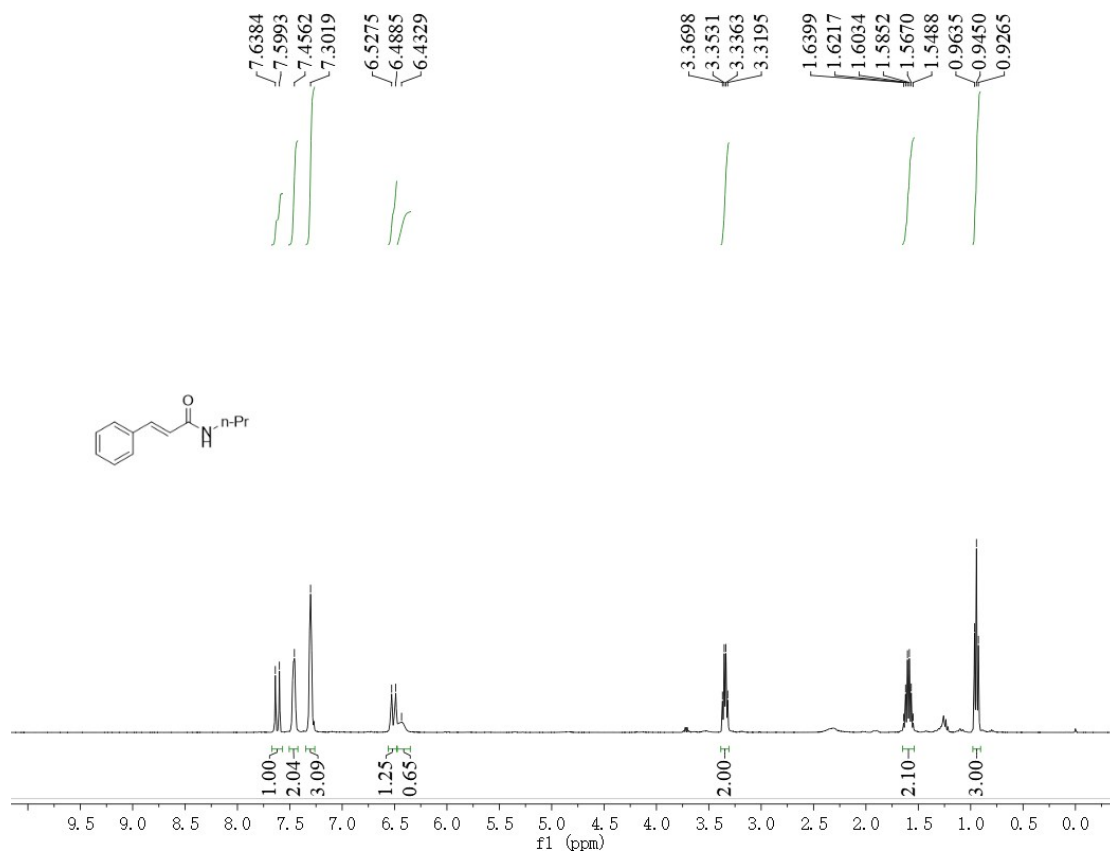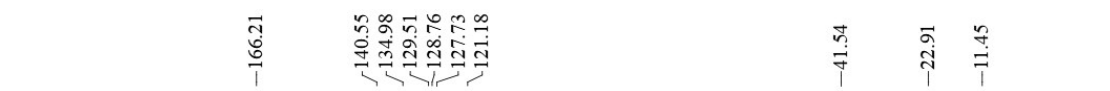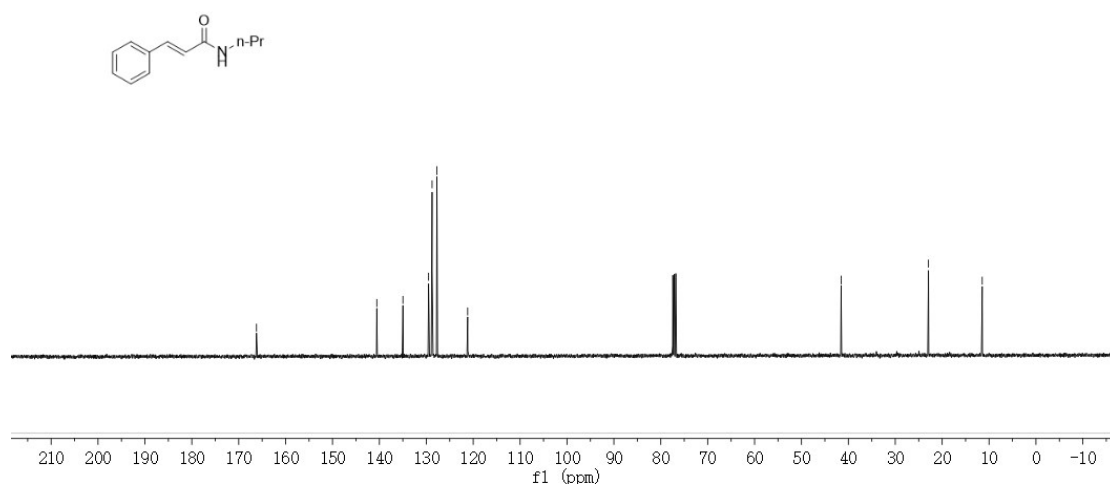

3-Phenyl-N-propylpropiolamide (6i)

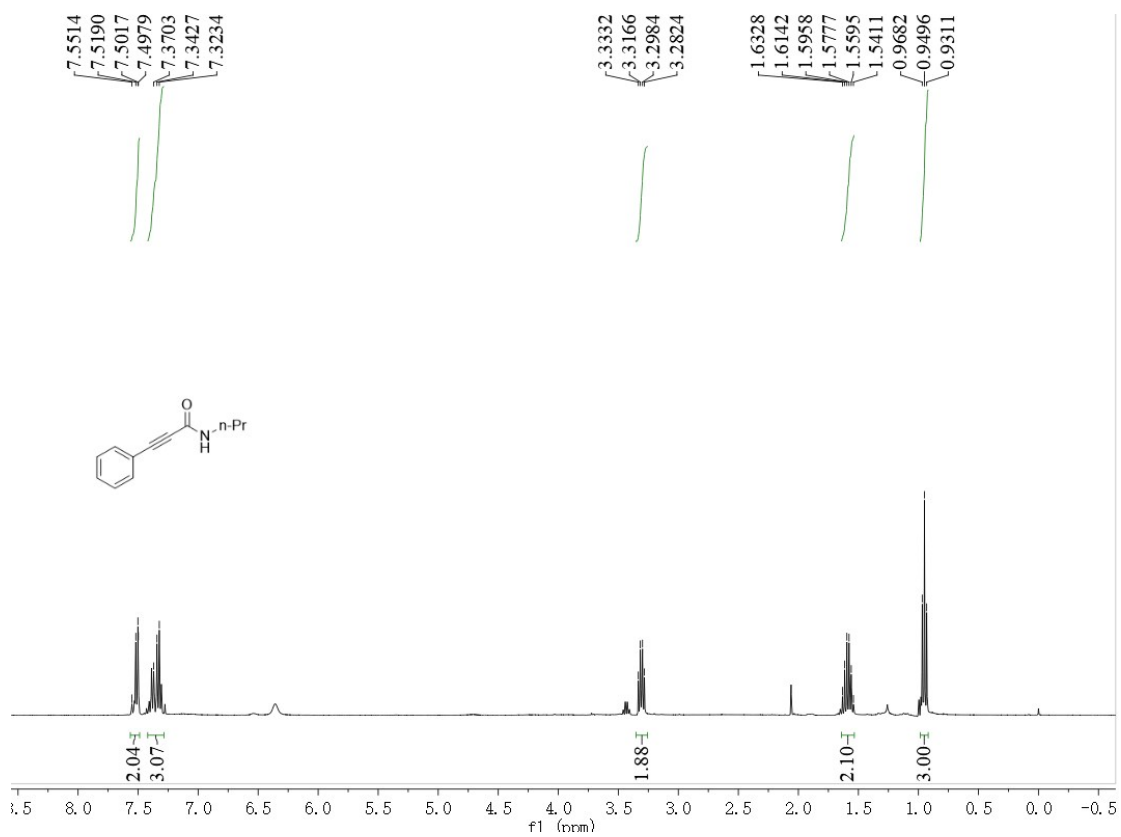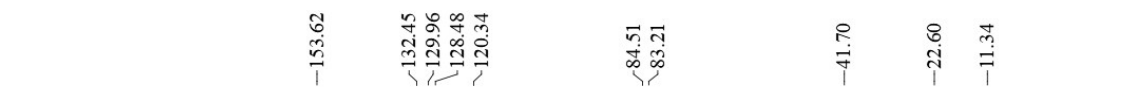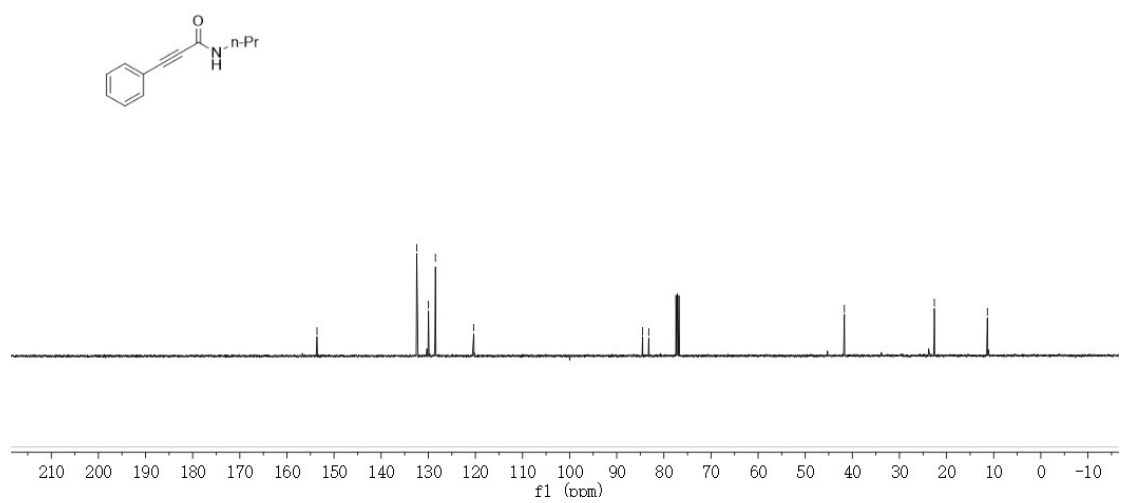

**N-(1-oxo-1-(propylamino)propan-2-yl)benzamide (6k)**

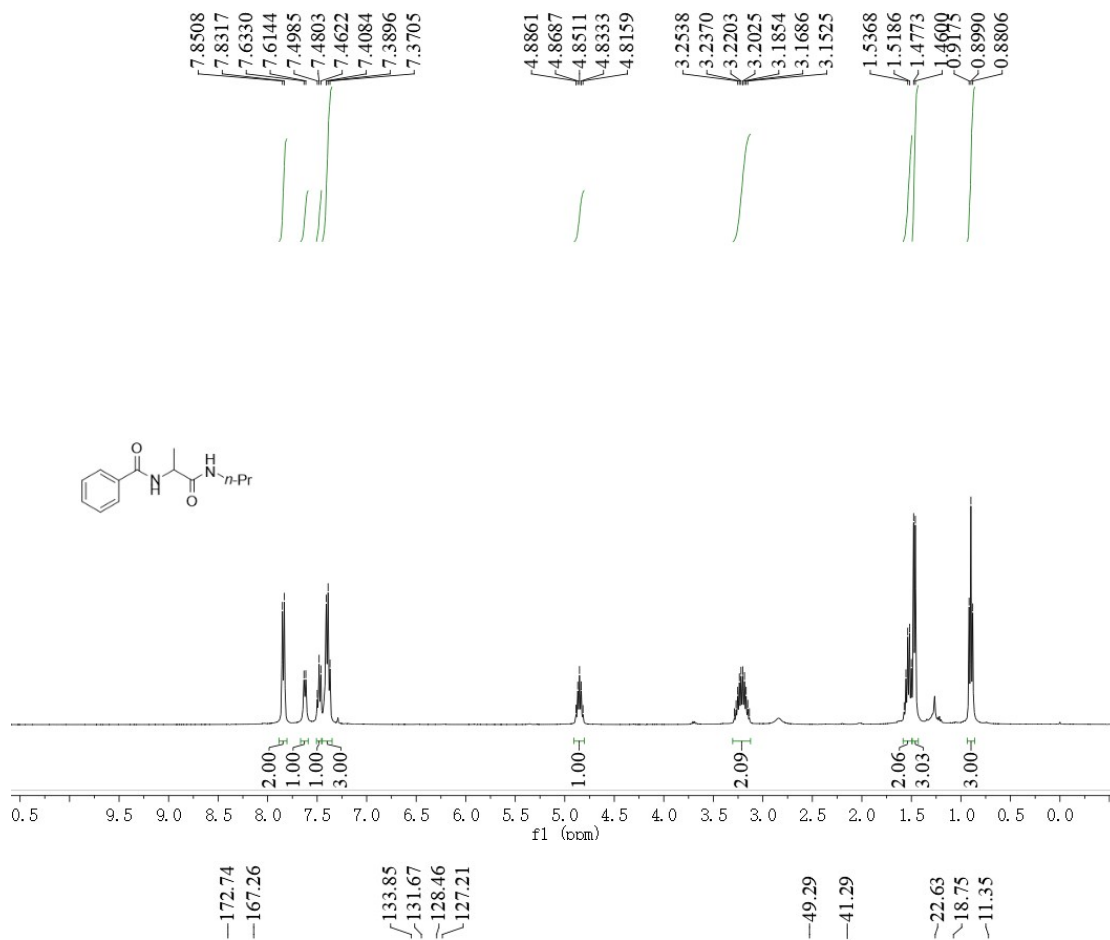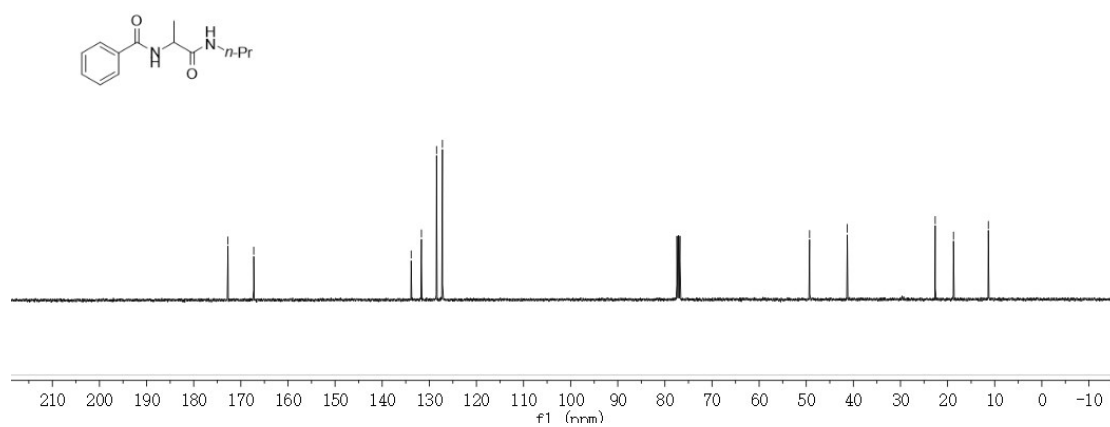

**Benzyl (1-oxo-1-(propylamino)propan-2-yl)carbamate (6l)**

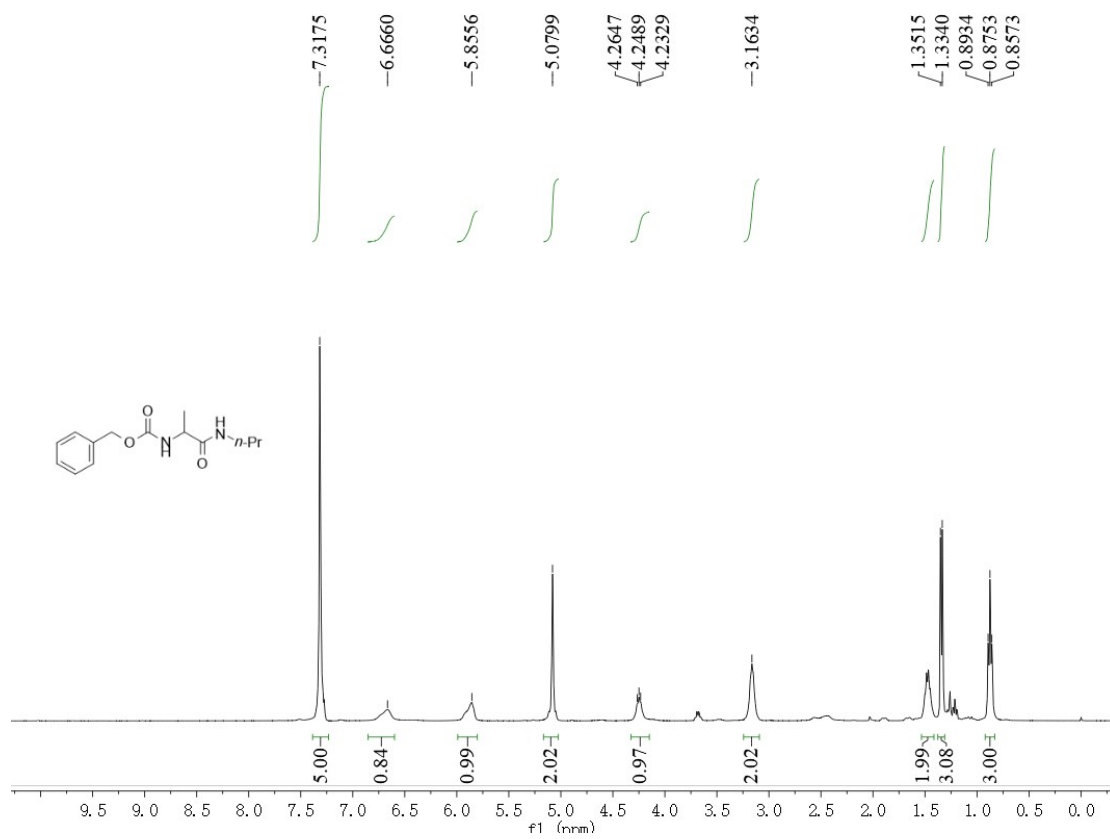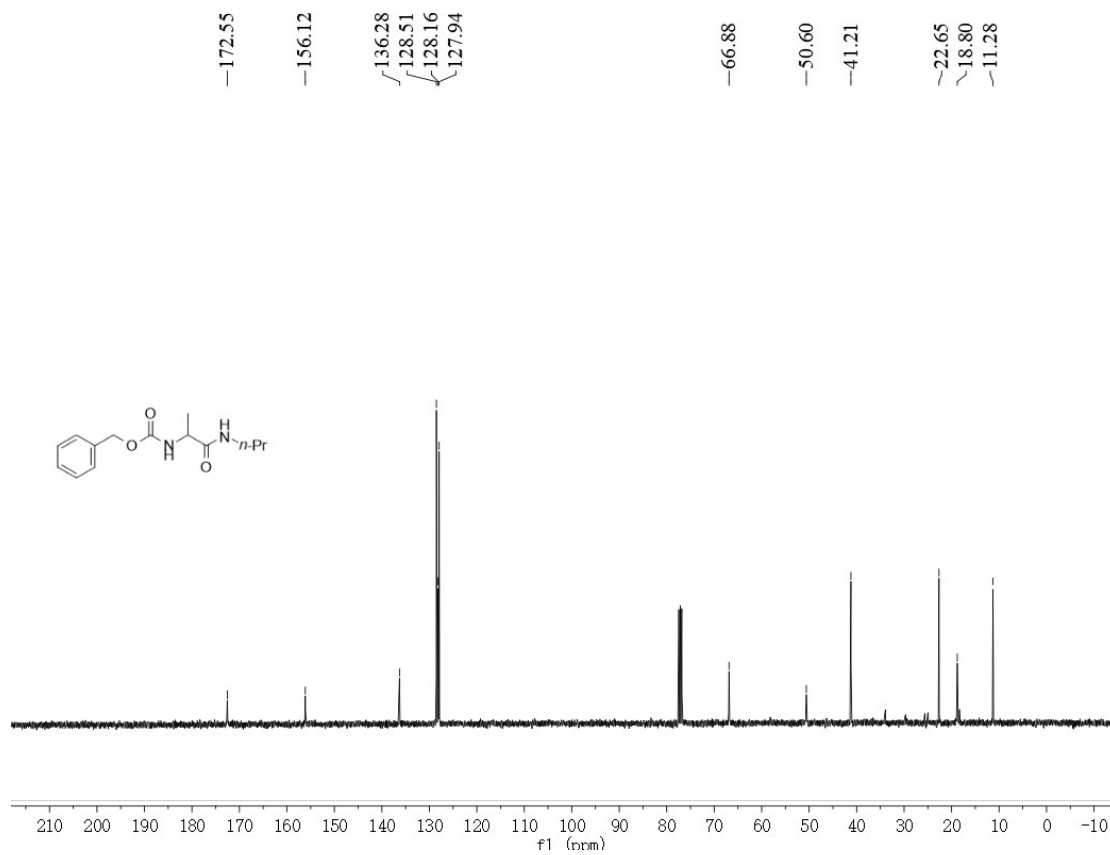

**2-Hydroxy-3-phenyl-N-propylpropanamide (6m)**

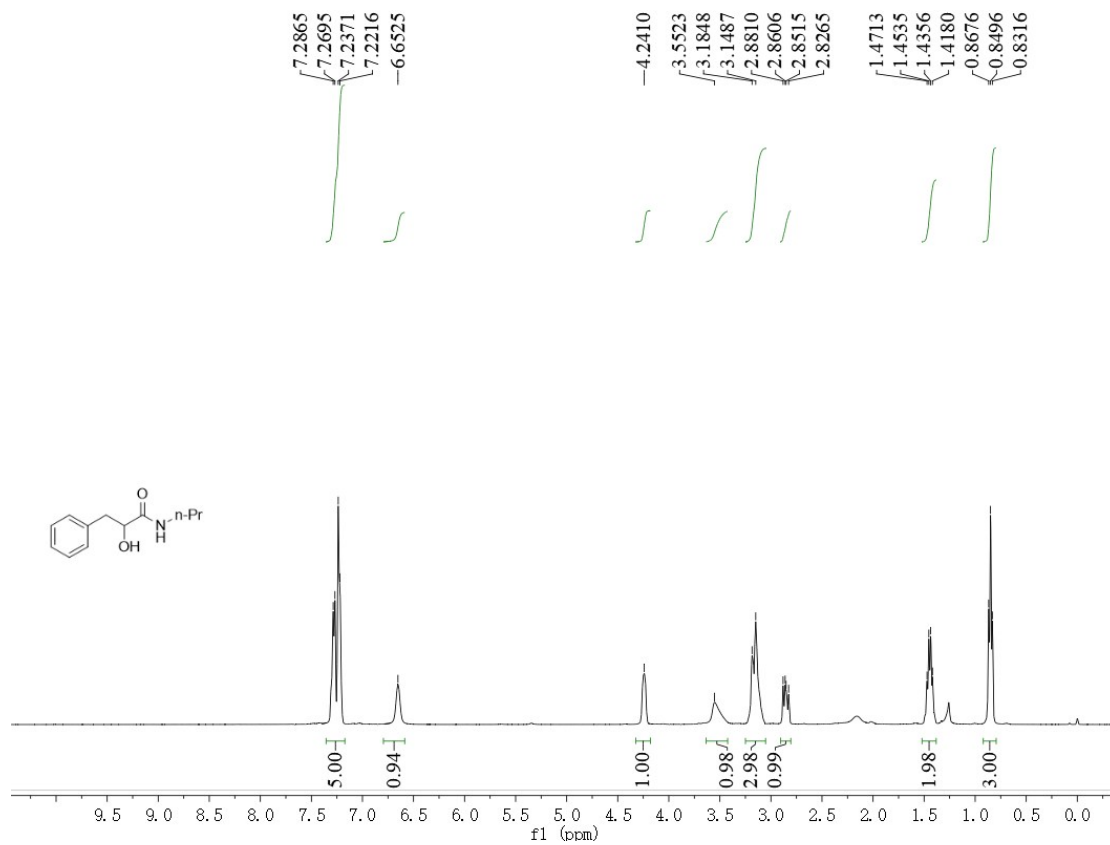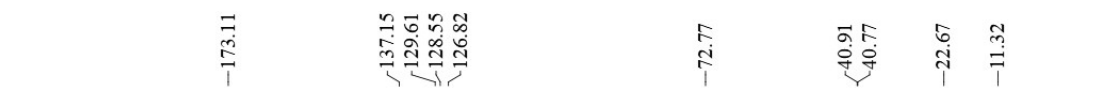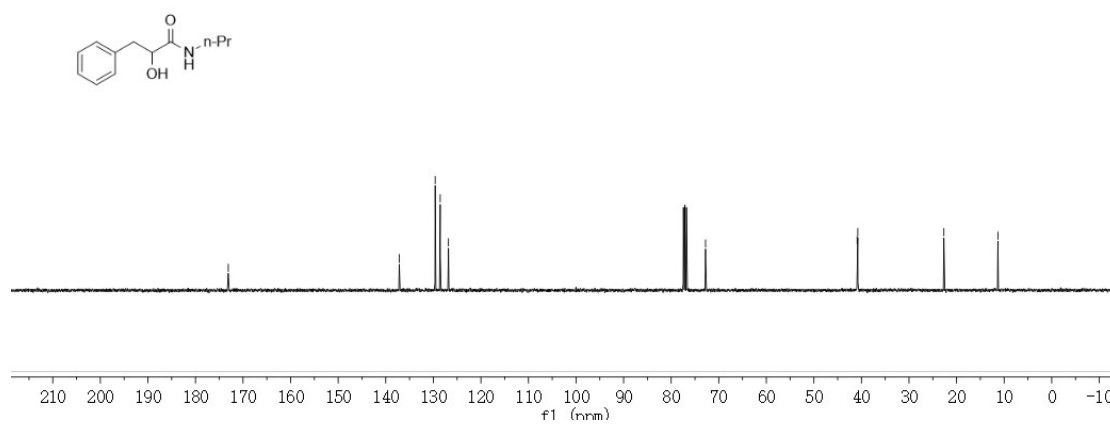

**Benzamide (6p)**



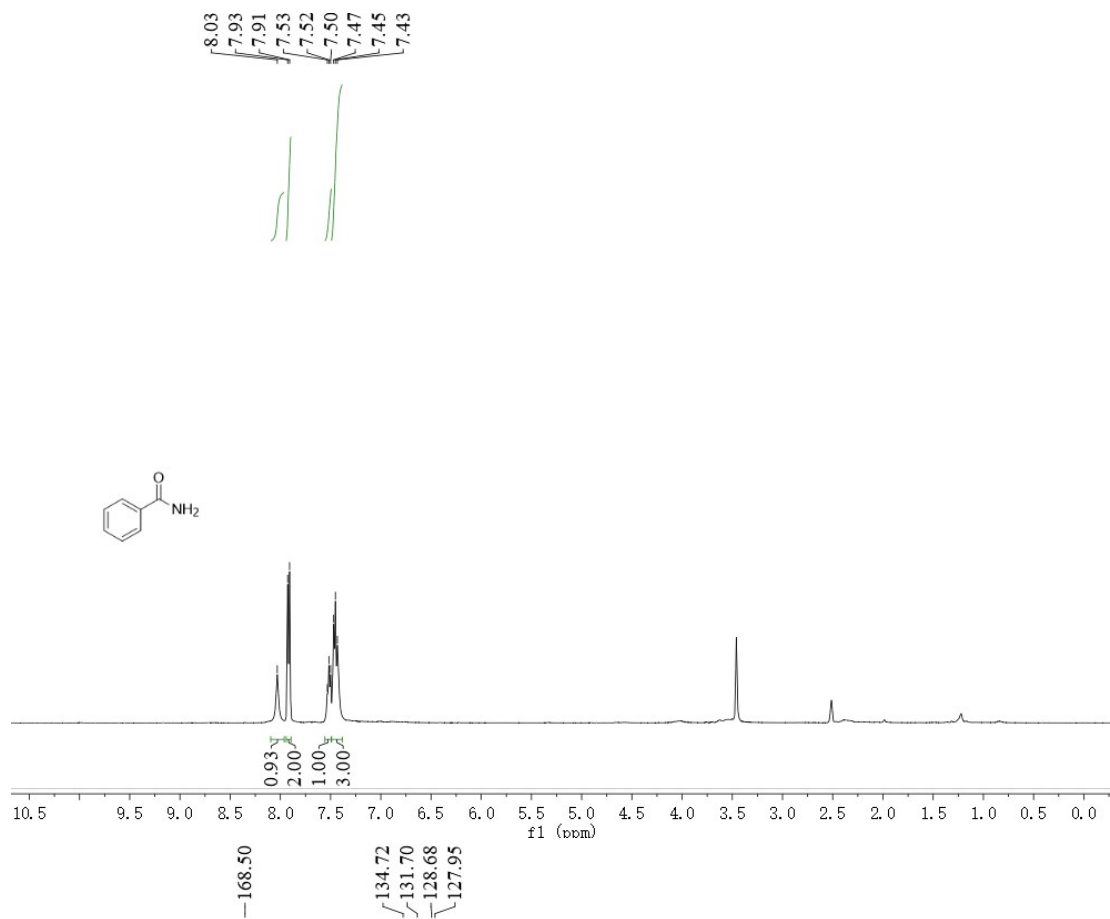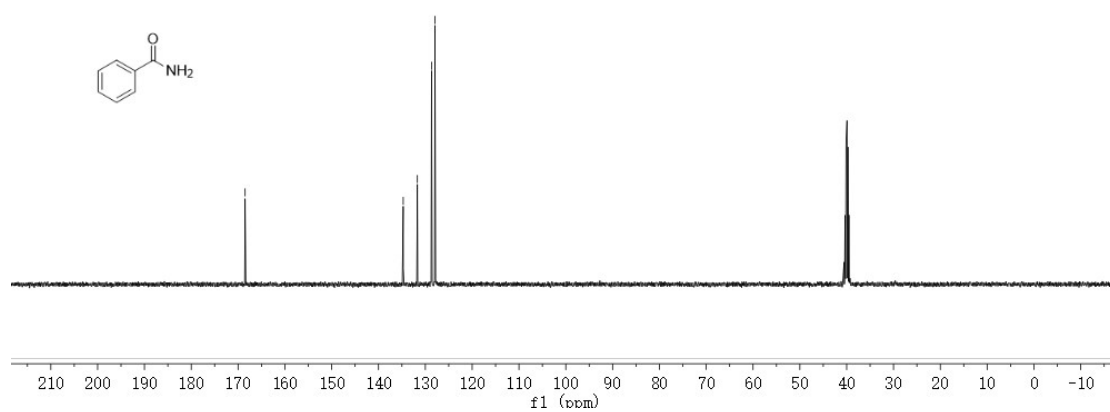

**N-methylbenzamide (6q)**

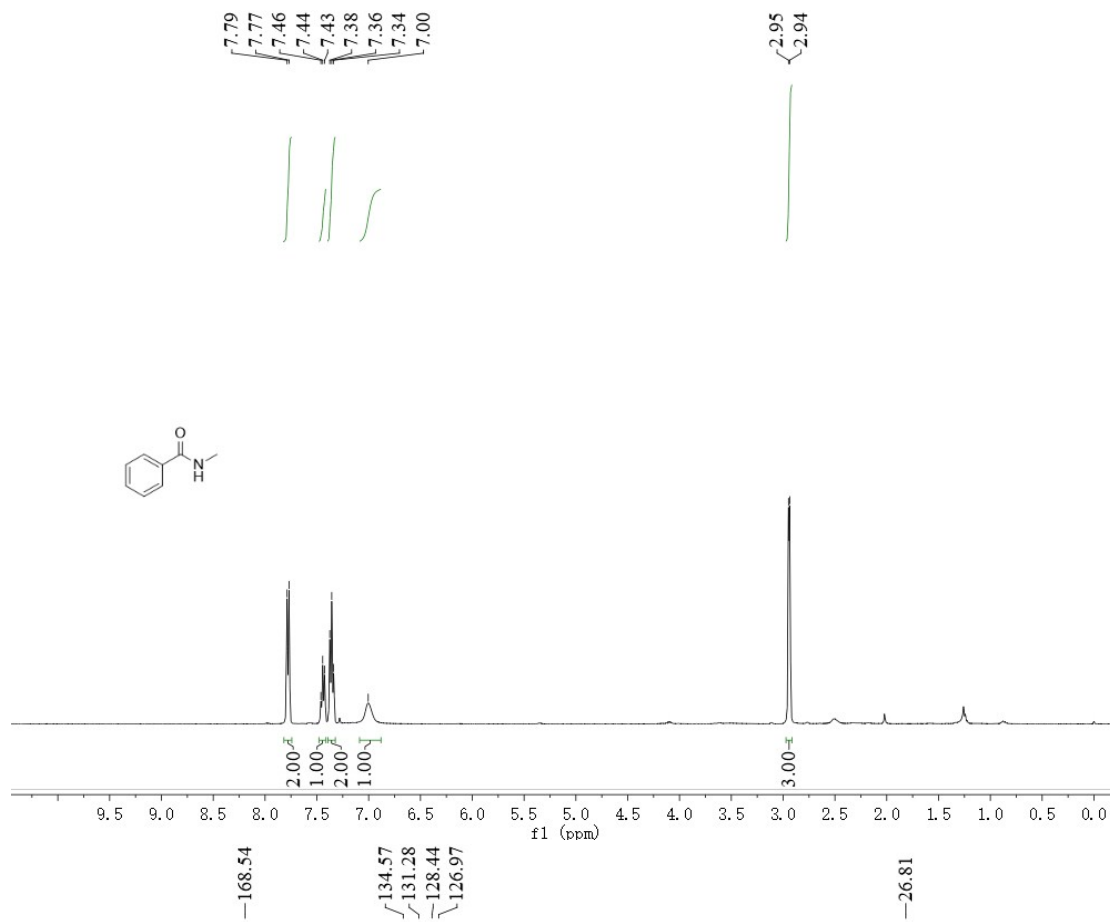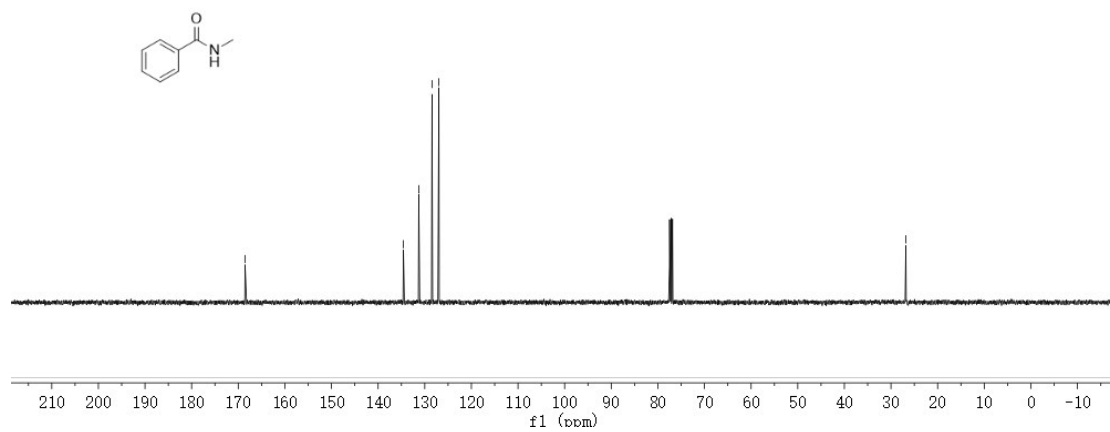

**N-phenylbenzamide (6r)**

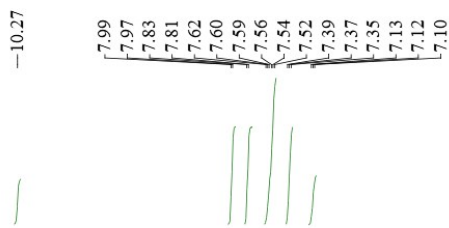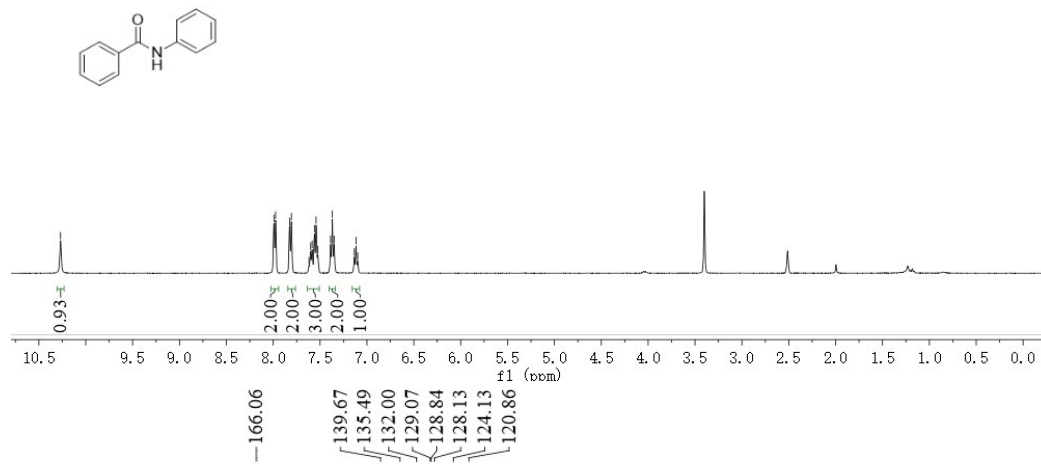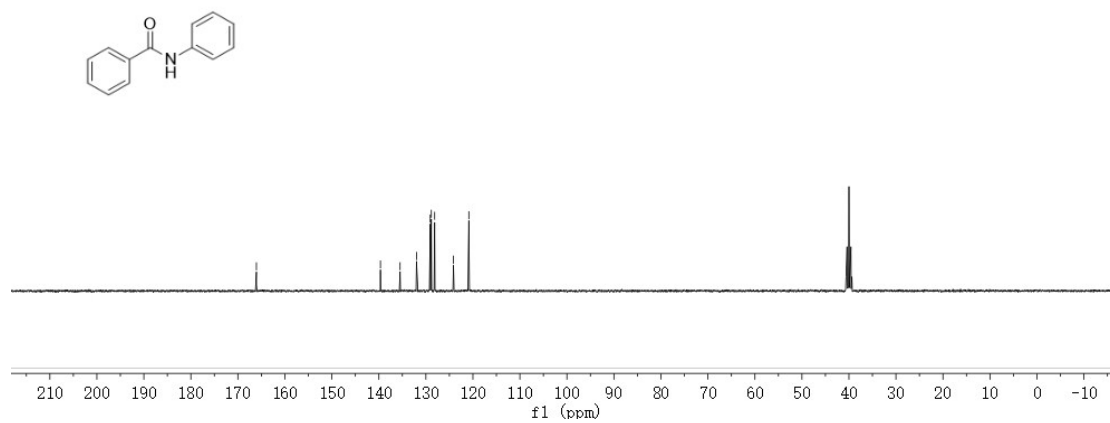

**N-benzylbenzamide (6s)**

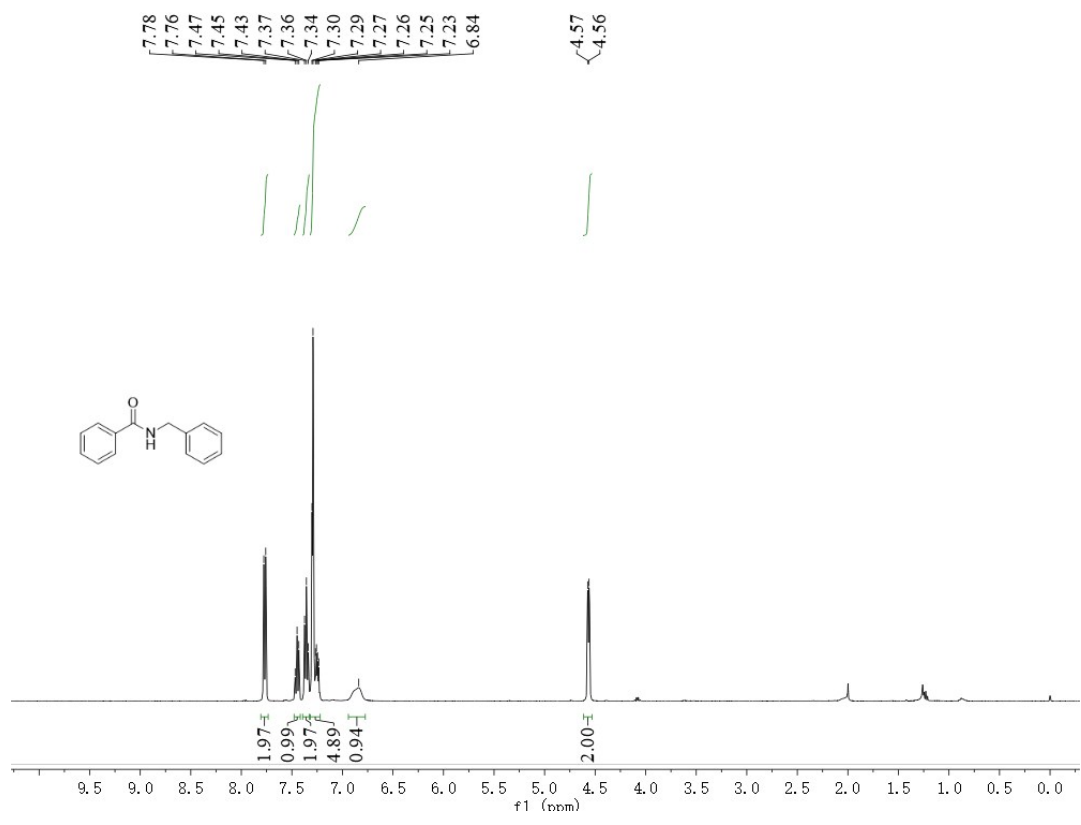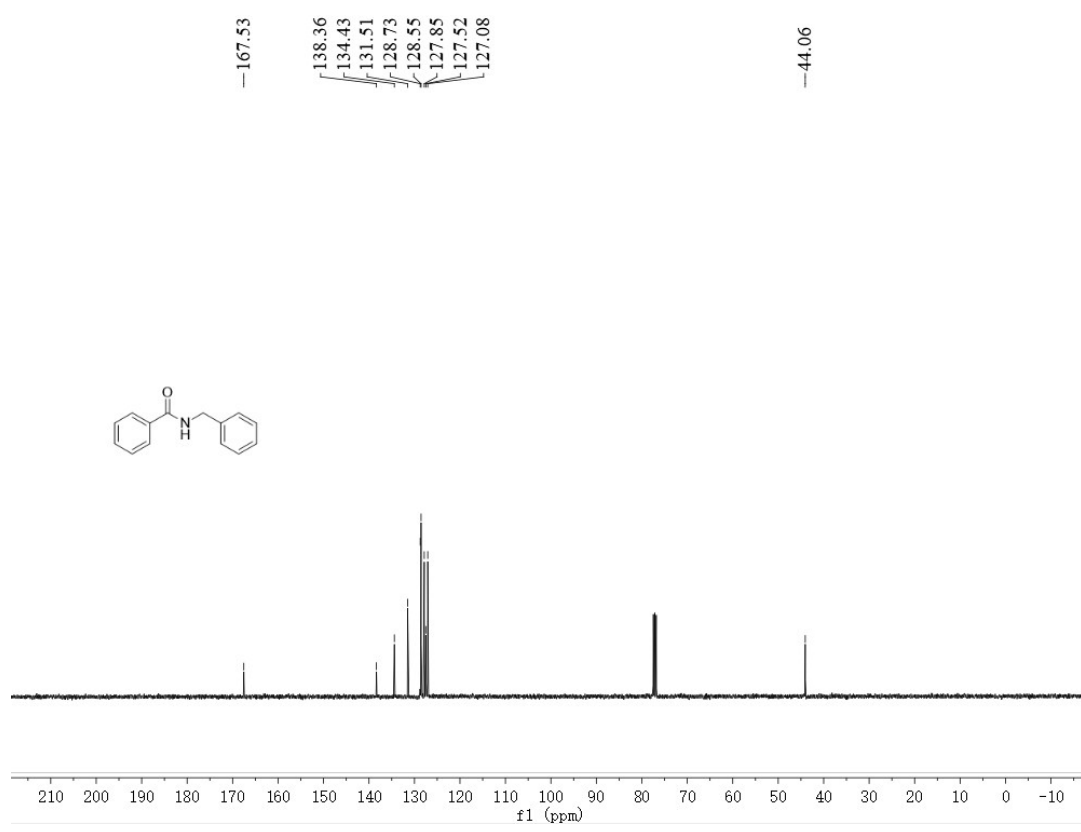

**4-Methyl-N-propylbenzenesulfonamide (8a)**

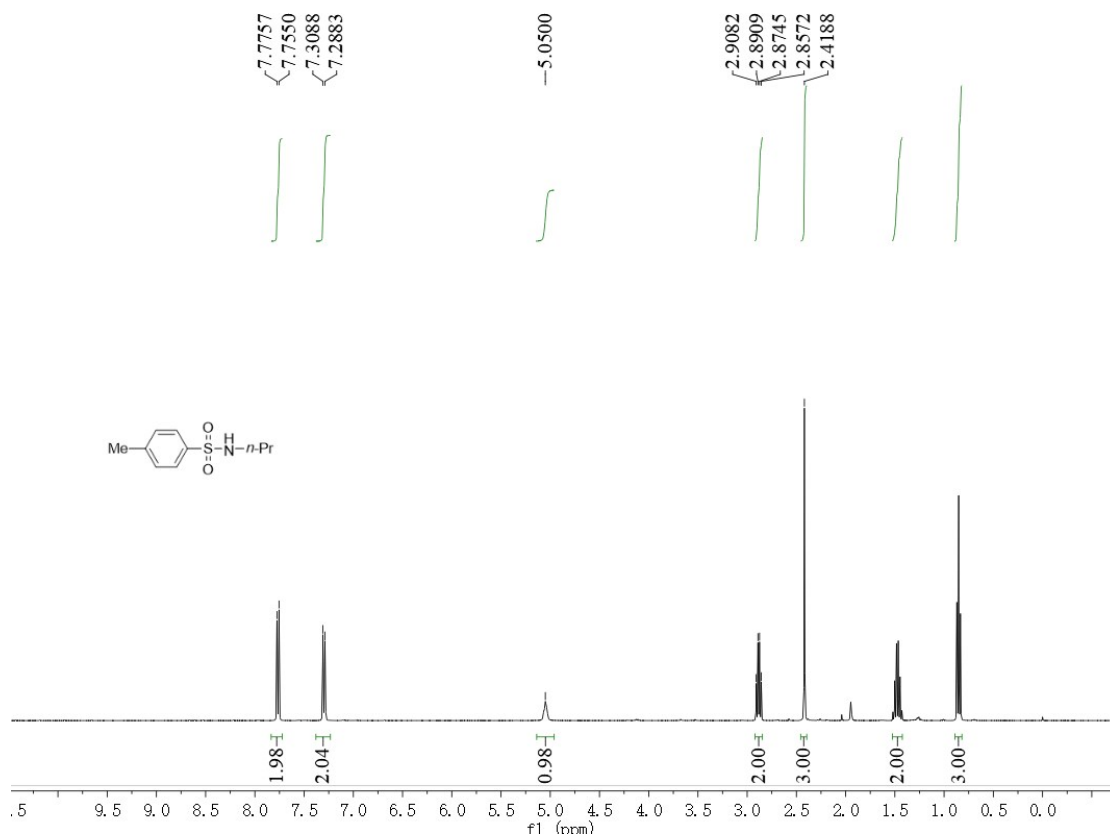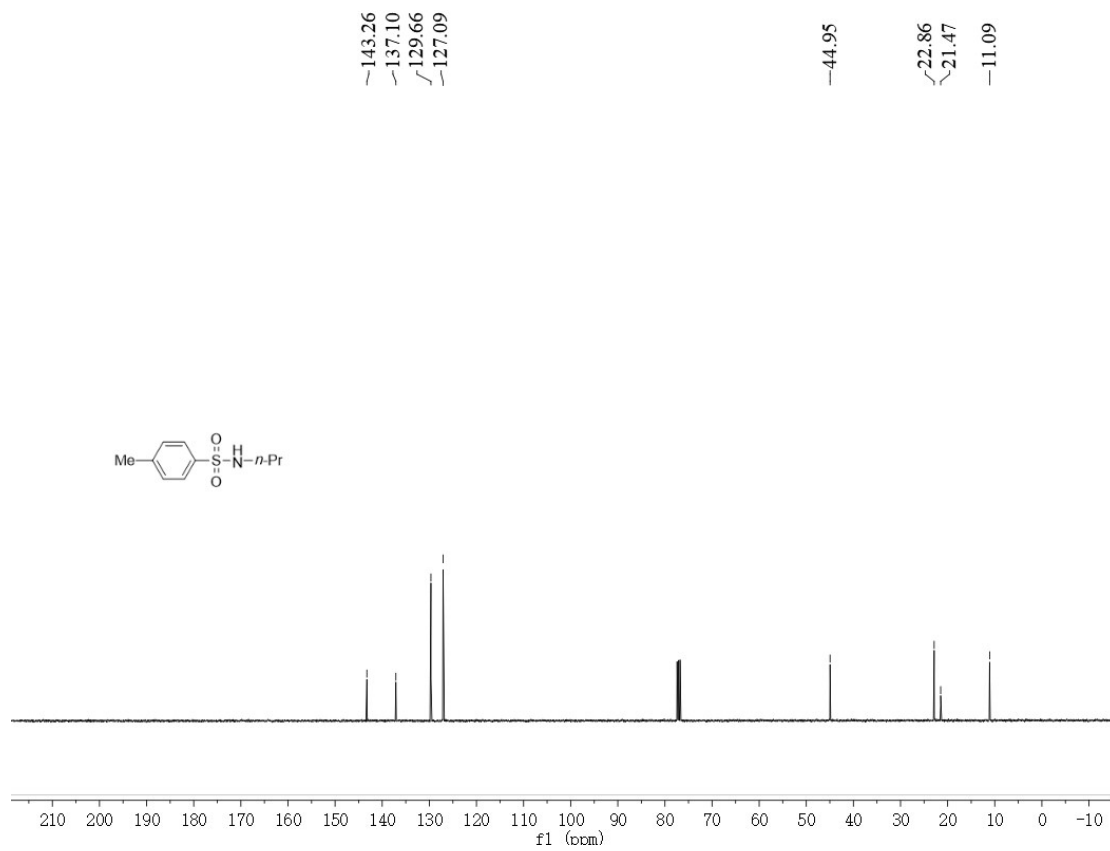

4-Methylbenzenesulfonamide (8b)

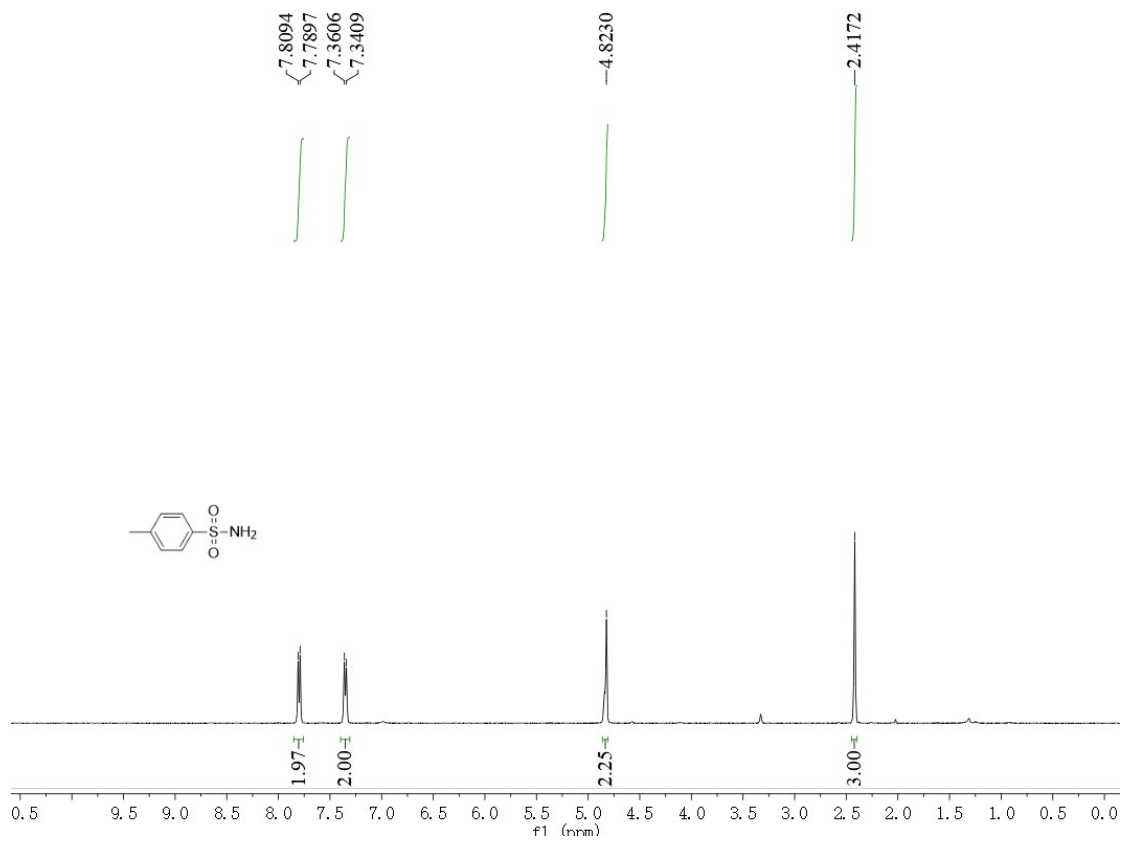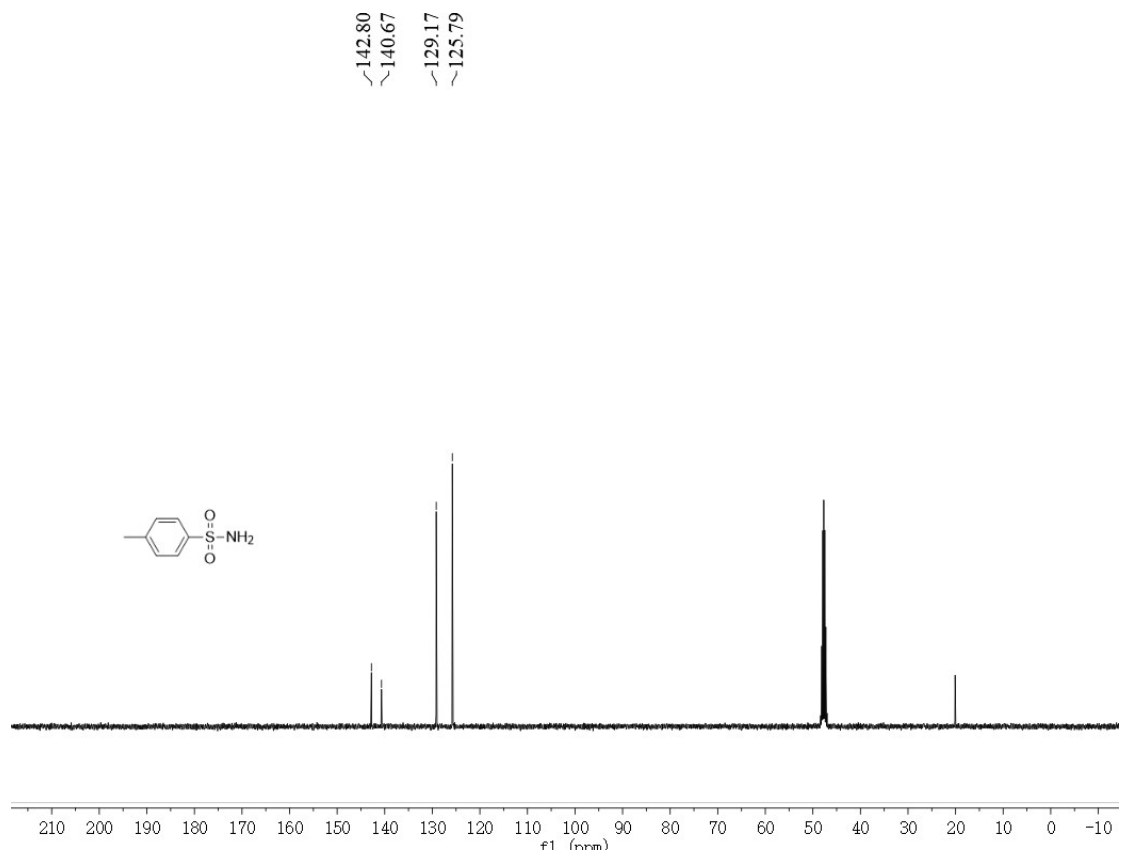

Supplement: c9gc00176j1.pdf [file c9gc00176j1.pdf]
